# Supplementary material
Source: Research Square preprint supplement (doi:10.21203/rs.3.rs-8746817/v1)
Supplement: Supplementary file 1 [file 85809c4562b66d5630d6e97a.xlsx]

## Sheet: Sheet1
ID	TYPE	Residence	Gender	Age	Marital Status	Participation Count	Health Interest	Awareness Channel	Motivation 1	Motivation 2	Marathon Interest	Running Style	Environment Improvement Factors	Infrastructure Satisfaction	Club Membership	Tournament Participation	Marathon & Health	Recommendation Intent	Tournament Awareness	Tournament Perception	Positive 1	Positive 2	Negative 1	Negative 2	Direction	Weekly Exercise Frequency	Event Category	Willingness to Pay (WTP)	Initial Amount	Initial Amount (+)	Initial Amount (-)	Reason for Non-payment	Reason for Payment	Education	Income	Occupation	Physical 1	Physical 2	Physical 3	Physical 4	Physical 5	Physical 6	Social 1	Social 2	Social 3	Social 4	Social 5	Social 6	Mental 1
1	A	1	2	4	2	1	5	3	1	3	3	2	2	5	2	2	5	5	2	5	2	1	1	2	1	1	1	1	1	1			3	4	3	3	3	4	3	3	3	3	3	3	3	3	3	3	4
2	A	1	1	5	1	2	5	1	2	1	2	1	1	5	3	3	5	5	3	5	3	2	2	3	2	1	9	1	1	1			2	6	4	9	2	3	2	2	2	2	4	4	5	3	3	4	4
3	A	1	2	2	2	1	5	3	1	2	4	2	2	5	2	2	5	5	2	5	2	1	1	2	1	1	10	1	0		1		4	2	2	3	3	3	3	4	3	3	4	4	4	5	5	4	5
4	A	1	1	4	2	1	5	3	1	3	4	2	2	4	2	3	4	4	3	4	2	3	3	2	3	3	10	0				3		2	4	3	5	5	5	4	4	5	5	5	4	4	5	4	4
5	A	1	1	4	2	1	5	3	1	3	3	3	4	5	2	2	5	5	2	5	2	1	1	2	1	1	1	1	0		1		3	2	4	3	2	3	4	4	3	3	5	4	4	5	5	4	5
6	A	1	2	5	2	1	5	1	3	1	4	2	3	5	2	2	5	5	2	5	1	2	2	1	2	2	3	1	1	0			2	4	5	3	4	4	4	3	3	3	4	5	4	4	5	4	5
7	A	1	2	3	1	1	5	4	2	1	5	1	1	5	3	3	5	5	3	5	1	3	3	1	3	1	3	1	1	1			2	5	6	4	4	4	4	4	4	4	2	3	3	3	3	3	4
8	A	1	1	3	2	1	5	1	2	3	3	2	2	5	2	2	5	5	3	5	1	2	2	1	2	2	1	1	0		1		2	4	8	1	3	2	4	3	3	4	5	4	4	5	5	5	3
9	A	1	2	4	2	1	5	3	1	2	4	2	2	5	2	3	5	5	2	2	2	3	3	2	3	1	1	1	1	1			1	3	1	3	3	2	3	3	3	3	4	5	3	3	4	4	4
10	A	1	1	4	2	2	5	1	2	1	3	2	3	5	2	2	5	5	2	5	1	2	2	1	2	2	1	1	0		1		2	4	8	1	3	3	4	3	3	3	3	3	3	3	3	3	3
11	A	1	1	4	2	1	5	1	2	1	3	3	2	5	2	2	5	5	3	4	4	2	2	4	2	2	1	1	1	0			2	4	4	1	3	4	4	4	4	4	4	4	4	4	4	4	3
12	A	1	2	4	2	1	5	1	3	2	4	2	2	5	2	3	5	5	2	5	2	3	3	2	3	0		1	1	1			3	3	2	3	3	3	3	3	3	4	3	3	3	4	4	4	3
13	A	1	2	4	2	1	5	1	3	1	3	2	4	5	2	2	5	5	3	5	4	2	2	4	2	3	1	1	0		1		3	4	3	3	4	3	4	3	4	4	4	5	5	4	4	4	4
14	A	1	1	4	2	3	5	4	1	3	2	2	3	5	2	2	5	5	2	5	1	2	2	1	2	1	1	1	1	1			3	4	3	3	3	3	3	3	3	3	5	3	3	4	4	5	3
15	A	1	2	3	2	2	5	1	3	1	3	2	2	5	2	3	5	5	2	5	2	3	3	2	3	1	1	1	1	0			4	3	3	3	4	4	3	3	3	1	3	3	3	3	3	3	4
16	A	1	1	4	2	1	4	1	2	1	4	2	2	3	2	2	3	3	3	3	1	2	2	1	2	0		0				3		4	1	8	4	4	4	4	4	4	3	3	3	3	4	3	3
17	A	1	2	3	2	3	5	1	2	1	5	2	2	5	2	3	4	5	2	5	2	3	3	2	3	1	2	1	1	1			1	4	5	3	4	3	3	3	4	3	4	5	5	4	5	4	5
18	A	1	1	3	2	2	5	3	1	3	5	2	2	5	2	2	3	5	2	5	1	2	2	1	2	0		0				1		3	4	3	3	3	3	3	3	3	4	4	5	4	3	5	5
19	A	1	1	3	1	3	5	3	4	1	3	1	3	5	1	1	5	5	3	5	1	2	2	1	2	1	6	0				3		6	3	7	3	4	3	3	3	4	3	3	4	4	4	3	5
20	A	1	1	4	2	3	5	3	4	1	3	1	1	5	3	3	5	5	3	5	1	3	3	1	3	1	1	1	0		1		1	4	1	4	2	2	3	2	2	2	3	3	3	3	3	3	5
21	A	1	2	1	2	1	5	1	3	1	4	3	1	5	1	1	5	5	1	5	1	4	4	1	4	2	1	1	1	1			2	2	2	4	4	4	4	4	4	4	3	3	3	3	3	3	3
22	A	1	2	3	2	2	5	1	2	1	5	1	1	5	3	3	5	5	3	5	2	3	3	2	3	1	7	1	1	0			1	1	8	3	4	3	5	3	4	4	4	4	4	4	4	4	4
23	A	1	2	1	2	1	5	1	2	1	4	3	3	5	3	3	5	5	3	5	1	3	3	1	3	0		1	1	1			3	4	1	3	3	3	3	2	3	2	3	3	3	3	3	3	3
24	A	1	1	4	2	1	5	4	3	1	3	1	4	5	1	3	5	5	1	5	1	3	3	1	3	0		1	0		1		3	4	3	2	3	3	5	4	4	4	3	4	4	4	4	4	3
25	A	1	2	2	2	1	5	1	2	1	3	1	1	5	1	1	5	5	3	5	3	1	1	3	1	0		1	1	1			5	4	2	3	3	3	3	3	3	3	3	3	3	3	3	3	4
26	B	1	1	2	1	3	4	1	2	1	3	2	3	4	3	3	4	4	3	4	2	3	3	2	3	0		0				4		6	2	5	2	4	2	3	4	4	3	3	4	4	3	3	4
27	B	1	2	2	2	2	4	2	3	1	4	2	2	5	2	2	5	5	2	5	1	2	2	1	2	0		1	1	1			2	2	8	3	3	4	3	3	4	3	4	4	5	3	3	4	4
28	B	1	1	3	2	1	5	3	2	1	4	1	1	5	1	1	5	5	1	5	2	1	1	2	1	2	1	1	1	1			2	3	3	3	3	4	4	4	3	4	3	3	3	3	3	3	4
29	B	1	1	3	2	3	5	2	1	1	5	3	1	5	1	3	5	5	3	2	1	3	3	1	3	0		1	1	1			3	4	4	5	4	4	4	4	4	4	4	4	4	4	4	4	4
30	B	1	2	5	2	2	5	1	2	1	3	1	3	5	3	3	3	5	3	5	2	3	3	2	3	1	9	0				2		2	1	6	2	2	2	3	3	3	3	2	3	3	3	3	3
31	B	1	2	2	2	2	5	4	1	2	2	1	1	5	1	3	5	5	1	5	1	3	3	1	3	0		1	0		1		2	4	8	5	5	3	5	4	5	5	4	4	5	5	4	4	3
32	B	1	1	1	2	2	5	2	3	1	2	1	1	5	3	3	5	5	3	5	1	3	3	1	3	1	1	1	1	0			1	4	1	3	4	3	3	2	2	2	3	3	3	3	3	3	4
33	B	1	2	1	2	3	5	2	3	1	5	1	3	5	3	3	5	5	3	5	1	3	3	1	3	0		1	1	1			3	4	1	5	2	2	2	2	2	2	4	4	4	3	3	5	4
34	B	1	1	4	2	2	5	4	1	2	5	2	2	2	3	3	4	2	3	2	1	3	3	1	3	0		0				3		5	3	4	4	2	3	3	3	3	3	3	4	5	5	4	4
35	B	1	2	4	1	2	5	1	2	1	5	2	4	5	3	3	5	5	3	5	2	3	3	2	3	0		1	1	1			1	4	4	4	3	3	3	2	2	3	3	4	4	4	5	4	3
36	B	1	2	4	1	1	5	1	2	2	5	2	2	4	3	3	5	4	3	4	2	3	3	2	2	1	3	0				3		6	4	4	4	3	3	3	3	3	2	2	3	3	4	4	4
37	B	1	1	4	2	2	5	2	1	2	5	1	3	5	1	3	5	5	1	5	1	3	3	1	2	0		1	1	0			3	4	2	4	1	2	2	3	2	2	4	5	3	3	4	5	3
38	B	1	2	2	2	1	5	2	3	1	5	1	1	5	3	3	5	5	3	5	2	3	3	2	3	0		1	1	1			3	4	4	4	3	2	3	3	5	2	4	5	5	4	4	4	4
39	B	1	1	4	2	1	5	1	2	1	5	1	1	5	1	3	5	5	1	5	1	3	3	1	2	0		1	1	1			3	4	3	3	4	4	3	4	3	3	4	4	5	5	4	4	4
40	B	1	2	4	2	1	5	4	1	2	5	3	1	4	3	3	4	4	3	4	2	3	3	2	2	0		0				3		6	2	3	3	3	3	3	3	3	4	5	5	4	4	5	3
41	B	1	1	2	1	1	5	1	2	1	5	2	3	5	2	3	5	5	2	5	2	3	3	2	3	0		1	1	1			0	4	6	5	5	4	5	4	5	5	5	4	4	4	5	4	4
42	B	1	2	1	2	1	5	2	1	3	5	1	1	5	3	3	5	5	3	5	2	3	3	2	2	1	1	1	1	1			4	4	2	3	3	3	3	3	3	3	4	5	5	4	4	5	3
43	B	1	2	1	2	1	5	3	1	2	5	1	4	5	1	1	5	5	1	5	2	1	1	2	3	0		1	1	1			3	4	6	3	1	1	1	2	2	3	5	3	3	4	4	4	5
44	B	1	2	1	2	1	5	1	3	1	2	3	3	4	2	2	5	4	2	2	1	2	2	1	2	0		0				3		4	2	3	3	3	3	3	3	3	4	4	5	5	4	5	4
45	B	1	2	3	2	2	5	1	3	2	1	2	2	4	3	3	5	4	3	4	2	3	3	2	2	0		0				3		4	4	3	5	5	4	4	4	4	4	4	5	5	4	5	5
46	B	1	2	3	2	1	4	1	3	2	3	2	2	5	3	3	5	5	3	2	2	3	3	2	3	0		1	1	0			2	3	4	3	5	4	4	2	4	3	4	4	3	3	4	4	5
47	B	1	2	5	2	1	4	2	3	1	3	2	2	5	2	3	5	5	2	5	2	3	1	2	4	0		1	1	1			1	6	5	2	3	3	3	3	3	3	4	4	5	4	4	4	4
48	B	1	2	3	2	1	4	3	2	1	4	2	3	5	3	3	5	5	3	5	1	3	3	2	3	0		1	1	1			3	2	1	3	4	3	4	4	4	4	3	3	4	4	4	4	5
49	B	1	1	3	2	3	5	3	1	2	5	3	2	4	2	2	5	4	3	4	2	2	1	2	3	1	1	0				3		4	1	3	5	3	3	3	3	4	4	4	4	4	5	4	3
50	B	1	2	3	2	2	5	1	2	1	4	2	2	4	3	3	4	4	3	4	3	3	2	1	3	1	7	0				4		4	2	3	3	3	3	3	3	2	4	4	3	4	4	4	5
51	A	2	2	1	2	1	4	1	3	1	3	1	3	5	1	3	5	5	1	2	1	3	3	1	3	0		1	0		1		2	4	3	3	3	3	2	2	2	2	4	4	4	3	3	4	4
52	A	2	2	2	2	3	5	4	1	3	3	2	4	5	2	2	5	5	2	5	1	2	2	1	2	1	1	1	1	1			3	4	4	3	3	3	4	3	3	4	5	4	4	4	5	4	3
53	A	2	2	3	2	2	5	3	2	1	2	4	2	4	2	3	5	4	3	4	2	3	3	2	3	1	1	0				3		6	2	3	4	3	3	3	3	3	4	5	5	5	4	4	4
54	A	2	1	3	2	3	5	3	4	1	3	2	2	5	3	3	5	5	3	5	1	3	2	1	3	1	1	1	1	1			2	6	2	9	5	5	5	4	5	5	5	5	5	5	5	5	4
55	A	2	1	3	2	3	5	2	3	1	4	2	3	3	2	2	4	3	2	3	1	2	2	4	2	0		0				3		6	2	5	4	4	4	4	4	3	4	4	3	3	4	4	4
56	A	2	2	4	2	1	5	2	1	2	2	4	2	5	3	3	5	5	3	5	2	3	3	2	3	1	1	1	1	1			1	4	1	5	4	3	5	4	4	4	5	5	5	5	5	5	5
57	A	2	2	3	2	2	4	4	1	2	5	1	1	4	1	1	5	4	1	2	3	1	2	4	1	0		1	0		1		3	4	1	3	2	2	3	3	3	3	4	4	4	4	4	4	3
58	A	2	2	4	2	1	5	2	3	1	3	1	3	3	1	3	3	3	1	3	1	3	2	1	3	1	2	0				2		4	4	5	5	3	3	4	4	3	5	5	5	5	5	5	5
59	A	2	2	2	2	1	5	2	3	1	3	3	4	5	3	3	5	5	3	5	2	3	3	2	3	1	1	1	0		1		2	4	1	5	2	3	3	2	3	3	2	2	2	2	2	2	3
60	A	2	2	3	1	1	4	2	3	1	4	2	2	5	2	3	5	5	2	5	2	3	2	1	3	0		1	1	1			0	4	6	5	3	3	3	3	2	3	5	5	5	5	5	5	3
61	A	2	2	2	2	3	5	3	1	3	3	1	3	5	1	1	5	5	1	5	2	1	3	2	2	1	1	1	1	0			3	6	2	3	3	2	3	3	3	2	3	3	3	3	4	4	4
62	A	2	2	4	2	2	5	3	1	3	4	3	2	4	3	3	4	4	3	4	2	3	2	1	2	1	1	0				3		4	2	3	3	2	3	3	3	3	5	5	5	5	5	5	4
63	A	2	2	4	2	1	5	1	2	1	3	2	2	5	2	2	5	5	2	2	3	2	2	1	3	1	1	1	1	0			1	4	1	3	4	2	3	3	5	4	5	5	5	5	5	5	4
64	A	2	2	4	2	3	5	1	2	1	5	4	3	5	1	1	5	5	1	5	2	1	3	1	2	0	1	1	0		1		2	4	4	3	5	2	4	5	5	5	5	5	5	5	3	5	4
65	A	2	2	5	2	2	5	3	2	4	5	2	2	4	2	3	5	4	2	4	2	3	4	1	2	0	2	0				3		3	2	3	4	5	5	4	5	5	4	4	3	4	4	4	4
66	A	2	1	5	2	2	5	1	2	1	5	4	4	5	3	3	5	5	3	5	2	3	3	2	3	1	1	1	1	1			2	4	1	5	2	1	5	3	4	4	4	4	4	4	4	4	4
67	A	2	2	4	2	2	5	2	1	2	5	2	3	5	2	2	5	5	2	5	1	2	3	1	2	1	9	0				3		8	5	2	3	3	2	3	4	4	4	4	4	4	4	4	4
68	A	2	2	4	2	3	5	2	3	1	5	3	1	3	3	3	4	3	3	3	1	3	3	1	3	1	1	0				3		4	8	3	4	4	4	5	5	5	5	5	5	5	5	5	3
69	A	2	1	2	2	3	4	1	2	2	5	1	1	5	1	1	5	5	1	5	2	1	1	3	2	0		1	1	0			1	7	3	2	3	2	2	4	2	3	4	4	3	3	4	4	4
70	A	2	1	3	1	3	5	1	3	3	5	1	3	5	1	3	5	5	1	2	1	3	3	2	2	2	3	1	1	1			2	5	1	4	5	4	4	4	4	4	2	3	4	3	3	2	4
71	A	2	2	4	1	2	5	1	3	3	5	1	1	5	3	3	5	5	3	5	2	1	2	1	3	1	3	1	0		1		1	4	2	4	3	2	2	3	3	3	4	4	4	4	4	4	3
72	A	2	2	4	1	3	5	1	2	2	5	1	1	5	1	3	4	5	1	5	3	2	1	2	4	0	9	1	1	1			2	4	3	8	3	3	3	2	2	2	3	3	3	3	3	3	4
73	A	2	2	5	2	1	5	1	3	1	5	2	4	5	2	2	5	5	2	5	2	1	3	1	3	1	9	1	1	0			1	6	1	2	3	3		4	3	4	3	3	4	5	4	5	5
74	A	2	1	3	1	1	5	1	2	1	5	1	1	5	3	3	5	5	3	5	2	3	3	2	3	1	4	1	0		1		1	4	3	7	3	3	3	3	3	3	5	5	5	5	5	5	3
75	A	2	2	4	2	2	5	1	2	1	2	2	2	5	2	2	5	5	2	2	2	1	1	2	1	2	2	1	1	1			2	4	2	3	3	3	3	3	3	5	3	3	3	3	3	3	5
76	B	2	1	4	2	2	5	1	2	1	1	1	3	5	1	3	5	5	3	5	1	2	2	1	2	1	2	1	1	1			2	4	2	3	4	4	4	3	4	3	4	4	4	4	4	4	3
77	B	2	1	1	2	2	5	1	2	1	3	2	2	5	2	2	5	5	2	5	1	3	3	1	3	3	1	1	1	0			3	6	5	2	1	3	4		4	2	4	4	3	4	3	4	3
78	B	2	2	3	2	2	5	2	1	3	3	2	2	5	3	3	5	5	3	5	1	2	2	1	2	0		1	1	0			1	5	3	2	4	4	3	4	4	4	4	4	4	4	4	4	5
79	B	2	1	2	1	2	5	1	2	1	4	2	4	5	2	2	5	5	2	5	2	3	3	2	3	1	4	1	1	1			1	5	4	8	4	3	3	3	3	3	4	4	5	5	5	5	3
80	B	2	2	4	2	2	5	4	2	1	5	1	1	5	1	3	5	5	1	5	1	2	2	1	2	0		1	0		1		1	6	8	3	4	3	3	3	4	4	4	4	4	3	4	4	3
81	B	2	1	3	2	3	2	2	1	1	4	3	1	5	3	3	5	5	3	2	4	2	1	2	2	4	2	1	1	1			4	6	2	5	3	4	4	4	4	4	4	4	4	4	4	5	4
82	B	2	2	3	1	1	1	3	3	2	3	2	3	4	2	3	4	4	2	4	2	3	3	2	3	0		0				1		5	1	4	2	4	4	3	4	4	5	4	5	4	4	5	3
83	B	2	1	5	2	1	3	3	1	3	3	2	4	5	2	3	5	5	2	5	4	2	1	2	2	5	1	0				3		3	1	3	4	3	4	4	4	4	4	4	4	4	4	4	4
84	B	2	2	4	2	2	3	3	1	1	2	2	2	3	3	3	4	3	3	3	1	2	2	1	2	0		0				3		4	3	3	3	3	3	3	3	3	3	2	3	3	3	2	4
85	B	2	1	2	2	1	4	1	2	1	3	3	3	4	2	3	5	4	2	4	2	3	3	1	3	0		0				3		4	4	3	3	3	3	3	3	3	4	2	3	4	2	4	3
86	B	2	1	3	2	1	5	1	1	4	4	2	2	4	2	2	5	4	2	2	1	2	2	1	2	3	10	0				1		4	4	3	4	4	4	2	4	4	3	4	4	4	3	3	4
87	B	2	2	3	2	1	4	1	3	1	2	1	3	4	3	3	5	4	3	4	2	3	3	2	3	3	1	0				2		4	2	5	1	1	1	1	3	3	3	4	3	4	3	3	4
88	B	2	1	3	2	1	3	2	1	2	5	1	4	5	1	3	5	5	1	5	1	2	2	1	2	5	3	0				4		6	4	5	3	2	2	3	3	2	4	4	4	4	4	4	5
89	B	2	2	3	2	1	3	2	1	3	3	2	2	3	2	3	4	3	2	3	1	2	2	4	2	0	1	0				3		6	3	3	4	3	4	3	4	4	3	3	3	3	3	3	4
90	B	2	2	3	2	1	2	4	1	2	3	3	3	5	3	3	5	5	3	5	1	3	3	2	3	3	1	1	1	1			3	6	2	5	3	3	4	3	3	2	3	3	3	3	3	3	5
91	B	2	2	2	2	1	3	3	3	1	4	1	4	5	1	3	5	5	1	2	1	4	2	4	4	3	1	1	1	0			3	3	6	3	3	3	4	3	3	4	3	3	3	4	3	3	4
92	B	2	1	3	2	2	4	1	1	2	3	2	2	5	2	2	5	5	2	5	2	3	2	1	3	0		1	1	1			3	4	2	5	2	2	3	4	4	2	5	5	5	5	5	5	5
93	B	2	2	3	2	1	2	2	1	3	4	3	3	4	2	3	5	4	3	4	1	3	3	2	3	0		0				3		4	6	3	3	2	3	2	3	3	4	4	3	3	3	3	5
94	B	2	1	2	2	1	5	1	2	1	3	1	1	5	3	3	5	5	3	5	1	3	2	1	3	4	1	1	1	1			4	6	2	5	4	2	4	2	3	3	4	3	3	3	3	3	3
95	B	2	2	4	2	1	3	3	2	1	3	2	2	5	2	2	5	5	2	5	3	1	3	2	1	0		1	1	1			3	6	4	3	4	3	4	3	4	3	3	3	3	3	4	3	4
96	B	2	2	3	2	3	3	3	2	1	4	2	3	5	3	3	5	5	3	2	2	3	2	1	3	3	10	1					3	6	4	3	4	4	4	3	4	4	3	4	4	4	4	3	3
97	B	2	1	1	2	2	4	2	1	2	3	3	4	5	1	1	5	5	1	5	1	2	2	1	3	5	2	0				3		6	5	5	3	2	2	1	3	2	4	4	4	4	3	4	3
98	B	2	2	4	1	1	3	3	4	1	2	2	2	5	2	2	5	5	2	5	2	1	3	1	2	4	9	1	1	0			1	5	1	4	4	4	4	4	4	4	4	4	2	3	3	3	3
99	B	2	2	3	2	3	4	1	3	1	4	1	3	4	3	3	5	4	3	4	1	3	4	1	2	4	1	0				3		4	1	3	3	3	3	3	3	5	5	5	5	5	5	2	3
100	B	2	2	3	2	2	3	2	1	3	4	2	2	5	2	2	5	5	2	5	2	3	3	2	3	5	1	0				6		4	2	3	5	2	5	4	5	5	4	4	3	3	3	3	3
101	A	3	2	4	2	3	3	2	1	2	3	3	4	4	3	3	4	4	3	2	1	3	3	1	2	4	3	0				3		4	3	3	2	2	4	3	4	3	3	4	3	3	3	3	3
102	A	3	1	4	2	3	4	1	1	2	4	2	2	4	2	3	5	4	2	4	1	3	3	1	2	0		0				4		4	4	8	4	4	4	3	4	4	4	3	3	3	3	4	4
103	A	3	2	3	2	1	4	2	1	3	5	1	3	4	1	1	5	4	3	4	1	3	1	3	3	0		0				3		6	3	5	4	4	4	4	4	4	3	3	2	2	2	3	5
104	A	3	1	5	2	2	3	3	3	1	3	1	1	5	3	3	5	5	3	5	1	3	3	2	2	6	1	1	1	0			1	6	2	5	4	3	5	3	5	4	3	2	3	3	3	3	4
105	A	3	1	4	1	1	2	3	1	2	4	2	2	5	2	3	5	5	2	5	2	3	2	1	3	0		1	1	1			1	5	2	4	3	3	3	4	4	3	3	2	2	1	1	2	4
106	A	3	2	4	1	1	3	3	2	1	3	1	4	5	1	1	5	5	1	2	2	3	1	2	2	4	5	0				1		5	2	4	2	3	2	4	4	3	4	3	2	2	3	3	5
107	A	3	1	3	2	1	4	1	1	3	3	2	2	4	2	2	4	4	2	4	1	3	3	1	2	0		0				3		6	8	5	3	2	3	3	4	2	5	5	5	5	5	5	5
108	A	3	2	4	2	3	2	4	2	1	4	2	2	4	3	3	5	4	3	4	2	3	3	2	3	4	4	0				3		6	3	8	4	2	5	3	4	4	3	3	2	1	2	2	3
109	A	3	1	5	2	2	3	2	1	2	3	3	1	5	1	1	5	5	1	5	1	3	3	1	4	0		1	0		1		1	6	4	5	4	2	2	3	3	3	4	4	3	3	3	4	4
110	A	3	1	2	2	1	3	1	2	2	2	2	3	4	2	3	5	4	2	4	2	3	3	2	3	0		0				1		6	1	5	2	2	4	3	4	3	4	3	4	5	4	4	3
111	A	3	2	1	2	3	3	3	1	3	3	2	2	4	3	3	4	4	3	2	2	3	3	2	3	0		0				6		4	2	3	5	5	5	4	4	4	4	4	4	4	4	4	4
112	A	3	2	3	2	2	2	2	3	2	4	2	4	3	2	2	5	3	2	3	2	3	3	2	3	3	1	0				4		4	1	3	5	4	4	4	4	4	4	4	3	4	5	4	3
113	A	3	1	4	2	2	4	2	4	3	5	3	3	4	2	3	4	4	3	5	2	1	1	2	1	0		0				2		4	1	1	4	2	3	3	3	3	4	4	4	4	4	3	2
114	A	3	2	4	2	2	3	1	1	2	5	1	1	5	1	1	5	5	1	5	1	2	2	1	2	3	8	0				4		4	3	3	2	2	2	2	3	3	4	4	4	4	4	4	3
115	A	3	1	4	2	3	3	1	2	3	3	2	2	4	3	3	4	4	3	4	2	3	3	2	3	3	1	0				1		4	4	1	2	2	3	3	3	2	3	4	5	4	4	5	4
116	A	3	1	4	2	1	3	2	2	1	3	1	4	4	1	3	5	4	1	4	2	3	3	2	3	3	3	1	1	0			3	6	4	5	3	4	4	3	4	4	4	3	4	3	4	3	4
117	A	3	2	4	2	2	3	3	2	1	4	2	2	5	2	2	5	5	3	2	2	3	3	2	3	3	1	1	1	1			3	4	2	3	4	3	3	3	3	3	4	3	3	3	3	3	3
118	A	3	1	1	2	1	3	1	5	2	5	1	1	3	3	3	4	3	3	3	1	3	3	1	3	4	2	0				4		4	4	3	4	4	4	4	4	3	3	3	4	4	4	3	3
119	A	3	2	2	2	1	4	2	1	1	4	2	2	4	2	3	5	4	2	4	2	2	2	2	2	4	1	0				4		4	3	3	2	2	2	2	3	2	4	4	4	4	4	4	4
120	A	3	1	2	2	1	3	3	1	2	3	2	3	5	2	2	5	5	2	5	3	3	3	3	3	0		1					3	4	2	1	3	4	3	2	3	3	3	3	3	3	3	3	4
121	A	3	2	2	2	1	3	3	3	2	3	1	4	4	1	1	4	4	1	2	1	3	3	1	3	5	2	0				4		8	8	7	3	3	3	3	3	3	4	3	4	3	4	4	4
122	A	3	1	2	2	1	2	1	3	2	3	2	2	4	3	3	4	4	3	4	1	2	2	1	2	0		0				4		4	2	1	4	4	4	3	4	4	4	4	4	4	4	4	4
123	A	3	1	3	2	1	4	4	3	1	4	1	3	4	1	1	5	4	1	4	2	3	3	2	3	3	6	1	1	0			3	4	6	7	3	3	3	2	3	2	4	3	3	3	3	3	3
124	A	3	2	3	2	1	2	4	2	1	4	1	1	4	3	3	3	4	3	4	1	3	3	1	3	0		0				3		6	2	5	4	4	4	4	4	4	4	4	3	3	3	4	5
125	A	3	1	3	1	2	5	1	2	1	5	1	1	5	3	3	5	5	3	5	1	2	2	1	2	4	5	0				4		5	4	4	4	4	4	4	4	4	4	3	3	3	4	4	3
126	B	3	2	5	2	1	4	3	2	3	3	3	3	4	2	2	4	4	3	2	2	3	3	2	3	1	1	0				4		4	4	3	4	3	4	4	4	4	4	3	3	4	4	3	3
127	B	3	2	2	2	1	4	1	1	2	2	2	4	4	2	2	4	4	2	4	3	1	1	3	1	1	7	0				4		4	5	3	4	3	3	2	4	4	4	4	4	4	4	3	3
128	B	3	1	3	1	1	1	3	1	2	2	2	2	4	3	3	5	4	3	4	1	3	3	1	3	1	11	0				4		4	1	5	4	3	4	3	4	3	3	2	2	2	2	3	3
129	B	3	2	3	1	3	4	4	1	3	5	1	1	4	1	1	4	4	1	4	2	3	1	2	3	4	8	1	0		1		1	4	1	5	2	2	2	3	4	3	3	4	2	3	3	3	5
130	B	3	1	3	2	2	4	3	1	2	5	2	3	5	2	2	5	5	2	5	2	3	3	2	3	3	9	1	1	1			3	6	2	3	3	3	3	4	3	3	5	5	5	4	5	4	4
131	B	3	1	2	2	1	3	1	1	3	5	1	1	5	1	3	5	5	1	2	2	1	1	2	1	4	1	1	0		1		4	6	3	3	3	3	4	3	3	4	4	3	3	3	3	3	3
132	B	3	2	2	1	3	3	3	1	2	5	1	1	5	3	3	5	5	3	5	2	3	2	1	3	4	9	1	1	0			1	5	4	4	3	3	4	3	4	3	4	4	3	4	4	3	3
133	B	3	1	2	2	2	3	3	1	3	5	2	4	4	2	2	5	4	3	4	3	2	3	1	2	1	3	1	1	1			2	6	3	3	4	4	3	4	4	4	3	4	3	3	4	5	4
134	B	3	2	4	2	3	3	2	1	2	5	2	2	5	3	3	4	5	3	5	2	1	2	1	2	1	2	0				3		6	2	3	5	5	5	4	4	4	4	4	4	4	4	4	5
135	B	3	2	1	2	3	3	2	1	2	5	2	2	5	3	3	4	5	3	2	2	3	3	2	3	2	5	0				3		6	8	3	3	4	4	5	4	4	3	3	3	3	2	4	3
136	B	3	1	2	2	1	2	1	2	1	5	2	3	4	2	2	5	4	3	5	2	3	2	1	2	2	1	0				4		4	3	3	4	3	4	3	3	3	5	4	4	5	4	5	5
137	B	3	1	1	2	2	2	2	1	2	5	1	1	3	1	1	5	3	1	3	2	1	2	4	2	0		0				3		4	4	3	3	4	3	2	3	3	3	4	3	3	4	3	3
138	B	3	2	1	2	1	3	4	1	2	5	3	1	5	1	3	5	5	1	5	3	2	3	2	3	3	1	1	0		1		3	4	5	3	2	3	2	3	2	1	3	1	1	5	5	3	4
139	B	3	1	3	2	1	5	4	1	3	5	2	4	5	2	2	5	5	2	2	2	1	2	4	2	7	1	1	0		1		5	2	2	1	3	2	2	3	2	3	4	4	4	4	4	4	5
140	B	3	1	2	2	1	5	2	1	2	2	2	2	4	2	2	5	4	2	4	2	3	2	1	3	3	1	0				4		4	3	5	2	2	2	2	2	2	5	5	4	3	4	5	3
141	B	3	2	3	2	3	2	1	3	1	1	2	3	5	2	3	5	5	2	5	2	1	3	2	2	3	1	1	1	1			3	2	4	3	4	2	4	3	4	3	4	4	3	3	3	3	4
142	B	3	2	2	1	2	1	4	2	4	3	1	3	4	1	1	5	4	3	5	1	2	2	1	2	3	9	0				2		6	4	3	4	2	4	3	3	3	3	3	2	3	4	2	3
143	B	3	2	3	1	1	1	1	2	1	3	2	2	5	2	3	5	5	2	5	1	3	3	2	3	2	4	1	0		1		1	6	2	3	2	3	2	4	2	1	3	5	3	4	4	3	3
144	B	3	2	3	2	3	2	2	1	2	2	2	2	5	3	3	5	5	3	2	1	2	2	1	4	0		1	1	1			3	6	5	3	4	5	5	4	5	5	4	5	5	5	4	5	3
145	B	3	2	3	1	2	4	2	1	2	4	1	1	5	3	3	5	5	3	5	2	3	2	1	3	3	5	1	0		1		1	5	8	4	3	2	4	3	3	3	3	4	3	3	3	4	3
146	B	3	1	3	1	2	4	1	2	1	4	2	4	4	3	3	5	4	3	4	1	2	3	1	3	3	3	0				4		5	2	4	4	4	4	4	4	4	4	5	4	4	5	3	4
147	B	3	1	3	1	2	4	4	1	3	3	1	1	4	3	3	5	4	3	4	4	2	4	1	2	3	3	0				4		7	4	7	3	3	3	2	2	3	3	3	2	3	2	3	5
148	B	3	2	3	2	1	3	1	1	2	4	1	1	5	3	3	5	5	3	5	2	3	3	2	3	3	2	1	1	0			3	6	4	6	2	2	2	3	2	2	4	4	4	4	4	4	4
149	B	3	1	3	2	1	4	4	3	1	5	3	3	5	1	3	5	5	1	5	4	2	3	1	2	3	1	1	1	0			3	4	6	1	3	3	3	3	3	3	3	3	2	3	4	3	5
150	B	3	2	3	2	1	3	1	1	2	3	1	1	5	3	3	5	5	3	2	1	2	3	1	2	3	2	1	1	1			3	4	1	3	4	3	4	3	3	3	3	3	3	3	3	3	3
151	A	4	2	4	2	1	3	2	1	2	4	2	2	5	2	2	5	5	3	5	2	3	1	3	3	0		1	1	1			2	4	5	3	3	2	2	3	3	3	3	3	3	3	3	2	5
152	A	4	1	1	1	2	4	3	1	2	3	1	4	5	3	3	5	5	3	5	1	2	3	2	2	4	3	1	1	0			1	6	5	4	3	2	2	3	4	3	5	5	5	5	5	5	3
153	A	4	1	3	1	1	2	3	1	2	3	2	2	5	2	3	5	5	2	5	2	3	2	1	3	3	11	0				2		5	5	4	4	3	4	2	2	2	4	4	4	4	3	3	3
154	A	4	1	4	2	2	3	1	1	2	4	1	3	5	1	1	5	5	1	2	1	2	1	2	2	5	1	1	1	0			5	4	6	1	4	3	3	2	3	3	5	3	3	4	3	5	5
155	A	4	1	4	2	2	3	1	1	2	3	2	2	3	2	2	4	3	2	3	1	2	3	1	2	3	10	0				4		3	2	1	2	2	2	2	2	2	2	2	2	3	3	3	4
156	A	4	2	4	2	2	3	2	1	2	2	1	1	5	3	3	4	5	3	5	1	3	3	2	3	3	1	1	0		1		3	4	4	3	5	5	5	4	5	5	4	4	5	4	5	4	4
157	A	4	1	5	2	2	3	3	3	2	3	2	4	5	2	2	5	5	3	5	1	4	4	1	4	3	1	0				2		4	5	3	4	2	3	4	4	3	4	4	4	4	4	4	4
158	A	4	2	3	2	2	4	1	1	2	4	2	2	4	2	3	4	4	2	4	2	3	3	2	3	2	1	0				3		6	3	3	4	2	4	3	3	3	3	3	3	3	4	4	5
159	A	4	1	3	2	1	4	3	1	2	5	3	2	5	3	3	5	5	3	2	1	3	3	1	3	2	2	0				5		6	6	3	3	4	3	2	3	3	5	5	5	3	5	3	5
160	A	4	2	2	2	3	2	4	1	2	5	1	1	4	1	3	5	4	1	4	1	3	3	1	3	0		1	1	1			2	6	8	7	3	2	2	3	3	3	4	3	4	4	4	3	4
161	A	4	1	2	1	2	2	3	1	4	3	1	4	5	1	1	4	5	1	5	3	1	1	3	1	3	3	0				4		5	4	4	2	2	2	2	2	2	4	4	4	4	4	3	4
162	A	4	1	1	1	2	4	2	2	1	3	1	1	4	3	3	5	4	3	4	2	3	3	2	3	5	2	1	1	0			1	6	3	6	4	4	5	4	4	4	5	5	5	5	5	5	3
163	A	4	1	4	2	2	4	1	1	2	4	2	2	4	2	2	4	4	3	2	1	2	2	1	2	6	1	0				1		4	4	5	3	2	4	3	4	3	3	4	2	3	2	4	3
164	A	4	2	2	1	1	4	4	1	3	5	2	3	4	2	2	4	4	2	4	2	1	1	2	2	1	3	0				4		6	5	4	4	4	4	3	4	4	4	5	3	3	3	5	3
165	A	4	1	3	2	1	3	1	1	2	4	2	2	4	3	3	4	4	3	4	1	3	3	1	3	6	1	0	0		1		2	6	1	5	3	4	3	3	3	3	4	4	4	4	4	4	3
166	A	4	1	3	2	1	5	1	1	2	3	2	2	5	2	3	4	5	2	5	2	3	3	2	2	3	1	1	1	1			3	4	3	5	4	3	4	3	3	3	4	5	4	4	4	4	4
167	A	4	2	4	1	1	2	3	1	2	3	2	4	5	2	2	5	5	3	5	1	3	3	1	2	2	9	0				1		5	3	4	3	2	3	3	3	2	4	4	3	3	3	3	3
168	A	4	1	2	1	2	3	3	1	3	3	1	1	5	3	3	5	5	3	2	1	3	3	1	3	3	11	1	1	1			1	5	5	4	4	3	3	3	4	4	4	4	4	4	4	4	5
169	A	4	1	1	1	1	4	1	2	1	4	2	2	5	2	3	5	5	2	5	1	3	3	1	2	0		0				4		5	2	4	4	4	4	4	3	4	4	3	3	3	3	3	5
170	A	4	2	5	1	1	4	1	1	2	4	2	3	5	2	2	5	5	2	5	1	3	1	2	3	2	8	1	0		1		1	5	8	4	4	4	4	4	4	4	4	4	4	4	3	4	4
171	A	4	2	5	2	1	4	1	2	1	5	2	2	5	3	3	5	5	3	5	2	3	3	2	2	3	1	1	1	0			3	4	4	3	3	3	3	3	3	3	3	2	2	2	1	2	4
172	A	4	2	3	2	1	4	3	1	2	3	1	4	5	1	3	5	5	1	2	2	3	1	2	2	3	1	0				4		4	3	3	4	4	4	4	4	4	4	4	3	3	3	3	3
173	A	4	2	5	2	1	4	1	1	1	2	1	1	5	3	3	5	5	3	5	1	3	2	1	3	3	1	0				1		4	2	3	3	3	3	3	3	3	4	3	3	3	3	3	4
174	A	4	2	3	2	1	3	3	1	3	2	3	3	5	3	3	4	5	3	5	2	3	3	1	4	1	3	0				1		6	6	3	3	3	2	3	4	3	3	3	3	2	2	3	4
175	A	4	2	3	2	1	4	1	1	2	5	2	2	4	2	3	4	4	2	4	1	3	2	1	3	1	3	1	0		1		1	6	5	3	4	4	4	3	3	2	3	4	2	3	3	3	3
176	B	4	2	4	2	1	4	2	1	3	5	1	1	5	1	1	4	5	1	2	2	3	3	2	3	3	1	1	1	1			3	4	2	3	2	2	3	2	3	3	4	3	3	3	2	3	4
177	B	4	2	4	2	2	3	2	1	2	5	1	4	5	3	3	5	5	3	5	2	3	2	1	3	0		1	1	1			3	6	2	3	5	5	5	5	5	4	4	3	3	3	4	3	4
178	B	4	2	3	2	1	4	2	1	2	5	2	2	5	2	2	4	5	2	5	2	3	2	4	3	3	1	1	1	1			3	4	3	3	4	3	3	3	4	3	3	2	2	3	1	1	4
179	B	4	2	3	2	1	4	2	1	3	5	1	1	5	3	3	5	5	3	5	2	1	3	2	1	3	1	1	1	0			5	4	2	3	4	4	4	3	3	3	3	4	2	3	4	4	4
180	B	4	2	3	2	1	3	3	4	2	5	2	3	5	2	2	5	5	2	5	1	2	2	4	2	3	3	0				1		4	4	3	4	3	4	4	4	4	4	5	4	4	5	4	2
181	B	4	2	4	2	1	4	2	1	4	5	1	1	5	1	1	5	5	1	2	2	3	2	1	3	0		1	1	1			3	4	6	3	4	3	3	3	2	3	2	3	3	3	2	2	4
182	B	4	2	2	2	1	4	2	1	4	5	2	2	5	2	3	5	5	2	5	2	3	3	2	3	3	4	1	0		1		3	4	2	3	3	3	3	3	3	3	3	2	3	3	2	3	5
183	B	4	2	2	2	1	4	2	1	2	5	1	4	5	3	3	5	5	3	5	2	3	2	1	3	3	9	1	1	1			3	4	5	3	4	4	3	2	3	3	3	3	3	3	3	3	4
184	B	4	1	3	1	1	4	2	3	2	5	2	2	5	2	3	5	5	2	5	1	3	3	2	3	0		0				4		6	4	8	3	2	3	3	3	3	4	4	3	2	3	3	5
185	B	4	2	1	2	1	5	1	2	1	5	1	1	5	3	3	4	5	3	5	2	2	2	1	2	5	3	1	0		1		3	6	5	5	4	3	4	4	4	4	4	4	4	3	5	5	3
186	B	4	2	3	2	1	3	1	1	3	2	2	4	4	2	2	5	4	2	2	3	3	2	1	3	1	3	0	1	0			2	6	3	3	4	3	4	3	4	4	2	2	2	2	1	1	4
187	B	4	2	3	2	2	4	1	1	2	1	2	2	4	3	3	5	4	3	4	1	3	3	1	3	1	2	1	1	1			3	6	4	7	4	3	3	4	4	4	3	3	3	3	3	3	4
188	B	4	2	2	1	1	3	3	1	3	3	2	2	3	2	2	4	3	2	3	1	2	4	1	2	2	3	0				1		5	4	4	4	4	4	4	4	4	4	4	4	4	4	4	3
189	B	4	1	3	2	1	3	3	1	2	3	3	4	4	2	2	4	4	2	4	2	3	3	2	3	3	1	1	0		1		3	4	3	1	4	3	3	3	3	3	3	3	3	3	3	3	3
190	B	4	1	4	1	1	4	2	1	2	4	2	2	4	2	3	4	4	2	2	1	3	3	1	3	5	2	1	1	1			5	6	2	8	3	3	4	3	3	3	5	5	5	5	5	5	4
191	B	4	1	1	2	1	5	1	2	2	5	1	1	5	3	3	4	5	3	5	1	2	3	1	2	0		0				1		6	8	5	4	4	3		5	4	4	4	4	4	4	5	3
192	B	4	2	2	2	1	4	1	1	2	4	2	4	5	2	2	5	5	2	5	2	3	1	3	3	0		1	1	0			1	6	4	7	4	4	3	3	4	4	4	3	2	3	4	3	3
193	B	4	1	2	1	1	4	2	1	3	3	1	1	4	1	3	4	4	3	4	3	1	3	2	1	3	6	0				1		5	4	4	3	2	3	4	4	3	4	3	3	3	3	4	5
194	B	4	2	5	2	1	2	3	1	3	2	2	4	5	3	3	5	5	3	2	1	3	2	1	3	3	1	0				3		6	2	3	2	2	2	2	4	3	4	4	4	4	4	4	4
195	B	4	2	5	2	1	4	3	1	2	4	1	3	4	1	1	4	4	1	4	2	3	1	2	3	5	2	1	1	0			5	6	5	3	4	3	4	4	4	4	4	4	3	4	3	3	3
196	B	4	1	4	1	1	1	1	1	2	4	2	2	4	3	3	5	4	3	4	2	3	3	1	3	0		1	1	1			2	6	8	6	4	4	4	4	4	4	3	4	2	3	4	4	3
197	B	4	2	5	2	2	4	1	1	3	3	1	1	5	1	1	5	5	1	3	2	1	3	2	3	3	1	1	0		1		3	4	1	3	3	4	4	3	3	4	3	4	3	3	3	4	4
198	B	4	1	2	2	1	4	2	2	1	4	2	4	5	2	3	5	5	3	5	2	3	3	2	2	0		1	1	1			3	6	8	6	4	4	4	3	4	4	3	3	3	3	3	3	3
199	B	4	1	4	2	1	5	1	1	2	5	1	3	5	3	3	4	5	3	5	3	2	2	3	2	3	1	0				2		4	2	1	4	4	4	3	4	4	3	4	3	3	4	3	4
200	B	4	1	4	1	1	4	1	1	2	3	1	1	4	1	3	5	4	1	4	2	1	1	2	3	5	11	1	1	0			1	6	3	4	2	2	3	3	3	3	4	2	3	3	4	4	4
201	A	5	1	5	1	1	5	4	1	2	4	2	4	5	3	3	5	5	3	5	2	3	3	2	2	1	6	1	1	0			2	5	4	6	4	2	4	3	2	2	4	3	3	4	4	3	3
202	A	5	1	3	1	1	4	1	2	3	3	1	1	4	1	1	4	4	1	2	2	3	3	2	2	0		1	1	1			1	5	8	6	4	2	2	3	3	4	3	4	3	3	2	3	4
203	A	5	2	3	1	1	4	1	2	1	3	1	1	5	1	3	5	5	1	5	1	2	2	1	3	0		0				2		6	2	4	4	4	4	4	4	4	4	4	4	4	4	4	4
204	A	5	1	4	1	1	5	1	2	1	4	3	5	4	3	3	5	4	3	4	2	1	1	2	2	1	6	1	0		1		1	5	2	4	3	2	2	4	4	3	1	3	3	3	3	3	5
205	A	5	1	4	1	1	4	4	1	2	3	2	2	5	2	3	5	5	3	5	3	2	2	3	3	0		1	1	1			2	5	1	4	4	3	3	2	3	3	4	4	3	4	4	4	4
206	A	5	2	4	1	1	4	1	2	1	2	2	2	5	2	3	5	5	2	2	2	1	1	2	2	0		1	1	0			1	5	1	4	4	4	4	3	4	3	4	4	4	4	4	4	5
207	A	5	2	4	2	1	4	4	1	2	3	2	3	4	3	3	5	4	3	4	2	3	3	2	2	0		0				4		6	4	5	4	2	3	3	3	3	5	5	5	5	5	5	4
208	A	5	1	4	2	1	4	1	2	1	4	2	4	5	2	3	5	5	2	5	2	1	1	2	3	0		0				3		4	1	3	3	3	3	3	3	3	4	4	4	4	4	4	5
209	A	5	1	4	1	2	4	5	2	1	5	1	1	5	3	3	5	5	3	5	1	2	2	1	4	0		1	1	0			1	6	6	3	2	3	3	3	3	4	4	4	4	4	4	4	5
210	A	5	1	3	2	1	5	1	2	1	5	1	4	5	1	3	5	5	1	5	1	3	3	1	3	2	7	1	0		1		2	6	2	3	4	3	4	2	3	2	4	4	4	4	5	3	3
211	A	5	2	4	2	1	5	1	3	1	3	2	2	5	2	3	5	5	3	5	1	2	2	1	3	1	2	1	1	0			3	6	2	3	2	3	3	3	2	4	3	3	3	3	3	4	4
212	A	5	1	3	2	1	5	1	2	1	3	1	1	5	3	3	5	5	3	2	2	3	3	2	3	1	2	1	1	1			2	4	1	3	4	4	4	3	4	4	3	4	3	3	3	3	3
213	A	5	1	3	2	1	4	1	2	1	4	2	5	4	2	3	4	4	2	4	1	2	2	1	2	0		0				4		4	4	3	2	2	4	3	2	2	3	2	2	2	2	2	3
214	A	5	2	3	2	2	5	3	1	2	5	1	1	5	3	3	5	5	3	5	4	2	2	4	2	1	2	0				2		4	2	3	3	3	3	3	3	4	4	4	4	4	4	4	3
215	A	5	2	4	2	2	5	4	2	1	4	1	1	4	3	3	4	4	3	4	2	3	3	2	3	1	2	0				2		6	87	3	2	2	2	2	2	1	4	4	3	4	4	5	3
216	A	5	1	1	1	1	4	1	4	1	3	2	2	5	2	2	5	5	2	2	4	2	2	4	2	0		1	1	1			1	5	5	4	3	3	2	3	2	2	4	4	3	3	4	4	3
217	A	5	1	3	1	3	4	2	4	1	3	1	4	5	3	3	5	5	3	5	1	2	2	1	2	0		0				2		5	4	4	2	4	3	3	2	2	3	4	3	3	4	4	3
218	A	5	1	1	1	2	5	2	1	2	3	1	3	5	3	3	5	5	3	5	2	3	1	2	3	1	11	1	1	0			2	5	3	6	2	2	3	3	3	3	4	4	4	3	3	3	4
219	A	5	2	4	2	2	5	2	1	3	4	3	2	3	2	2	4	3	2	3	1	2	3	2	2	1	5	0				2		6	1	3	2	2	2	4	2	3	4	4	3	3	5	4	5
220	A	5	1	2	1	3	4	4	1	3	4	1	5	3	3	3	4	3	3	3	2	3	1	2	3	0		0				2		5	2	4	3	3	4	3	4	3	5	5	5	1	5	5	4
221	A	5	1	2	1	2	5	2	3	1	5	1	1	5	3	3	5	5	3	5	1	2	2	1	2	4	8	1	1	0			2	5	3	4	2	2	3	3	3	3	4	3	3	3	3	3	4
222	A	5	1	2	1	3	4	5	2	1	3	2	2	5	3	3	5	5	3	2	1	2	3	1	2	0		1	1	0			2	5	1	4	2	2	2	2	2	2	4	4	4	4	4	4	5
223	A	5	1	3	1	2	5	1	2	1	2	2	4	5	3	3	5	5	3	5	1	3	2	1	3	2	6	1	1	1			1	5	3	4	4	3	2	3	3	3	4	5	4	4	4	4	5
224	A	5	1	3	1	3	4	1	2	1	2	3	3	5	3	3	4	5	3	5	1	4	3	2	4	0		0				2		5	2	4	4	4	3	4	4	4	5	5	5	5	4	5	3
225	A	5	1	5	1	1	4	4	3	1	5	2	2	4	2	2	4	4	2	4	2	3	2	1	3	0		0				3		5	2	4	2	2	2	3	4	3	4	3	3	3	4	4	4
226	B	5	1	2	1	2	5	1	4	2	5	1	1	4	3	3	4	4	3	4	1	3	2	4	3	0		0				2		6	5	2	4	4	4	4	4	3	4	2	3	3	4	4	3
227	B	5	1	1	1	1	4	5	4	1	5	1	4	4	1	1	5	4	1	4	1	3	3	2	3	0		0				5		6	3	5	4	4	4	4	4	2	4	3	3	3	3	3	4
228	B	5	1	1	1	2	5	5	1	2	5	2	2	4	3	3	4	4	3	2	3	1	2	4	2	2	6	0				2		6	4	5	4	4	4	3	4	4	2	3	3	3	2	2	3
229	B	5	1	4	2	1	5	1	3	2	5	3	1	5	1	3	5	5	1	5	2	3	2	1	2	0		1	0		1		2	6	1	4	3	2	3	3	3	3	4	4	4	3	3	3	2
230	B	5	1	4	1	1	4	4	1	2	5	2	4	4	3	3	4	4	3	4	1	2	3	2	3	0		0				4		6	2	6	3	4	4	4	4	4	5	5	5	5	4	3	3
231	B	5	2	4	1	1	4	4	1	1	5	1	1	5	1	3	5	5	1	5	2	1	2	1	2	0		1	1	0			1	5	1	4	4	4	4	3	4	4	5	4	3	5	5	5	4
232	B	5	2	4	2	1	5	1	2	1	5	2	3	5	3	3	5	5	3	5	1	3	3	2	2	1	1	1	1	0			1	4	1	4	4	4	3	3	3	4	3	3	3	3	3	2	4
233	B	5	1	2	2	1	5	1	3	1	5	3	4	5	1	3	5	5	3	2	2	3	2	1	3	2	1	1	1	1			2	4	3	6	2	2	3	3	3	3	1	1	2	2	3	2	3
234	B	5	2	4	2	2	4	1	2	1	5	1	1	5	1	1	5	5	1	5	1	3	2	1	2			1	1	1			1	6	4	3	4	3	3	4	3	2	3	4	3	3	4	3	3
235	B	5	1	4	2	2	5	5	1	2	5	2	3	4	3	3	4	4	3	4	1	3	3	1	3	2	2	0				2		5	4	4	2	3	4	4	4	3	4	4	4	3	3	4	4
236	B	5	1	2	2	2	5	5	1	2	2	2	2	5	2	2	5	5	2	2	1	3	4	1	2	0		0				6		5	2	4	2	2	4	3	4	2	3	3	3	3	4	3	4
237	B	5	1	1	1	1	5	5	1	2	1	2	4	5	2	2	5	5	2	5	1	3	3	2	2	3	3	1	1	0			2	5	4	4	2	4	4	4	4	4	4	5	5	4	5	5	4
238	B	5	1	1	1	2	5	5	1	3	3	3	3	5	1	3	4	5	1	5	2	3	3	1	3	3	3	1	1	1			2	5	3	4	4	3	4	3	4	3	3	3	3	3	3	3	4
239	B	5	1	1	1	1	5	1	2	1	3	2	2	5	3	3	5	5	3	2	2	3	3	1	4	2	9	1	1	0			2	5	8	4	4	2	4	4	4	4	3	3	3	3	3	3	3
240	B	5	2	3	2	3	4	1	2	1	4	1	1	5	1	3	5	5	3	4	1	3	1	3	3	0		1	1	1			3	4	7	6	4	2	2	3	3	4	3	3	3	2	4	2	5
241	B	5	1	3	1	1	5	1	4	1	5	3	4	4	3	3	5	4	3	5	2	3	3	2	3	1	9	1	1	0			1	6	2	3	4	4	4	4	4	4	4	4	3	3	3	3	3
242	B	5	2	5	2	2	5	2	1	2	4	1	1	5	1	1	5	5	1	3	1	3	2	1	3	1	7	1	1	1			1	6	6	3	4	4	4	4	4	4	2	2	3	3	4	2	3
243	B	5	1	3	1	1	4	4	1	3	3	2	2	5	2	3	5	5	2	4	2	3	1	2	3	0		0				3		5	2	4	2	2	2	3	2	2	3	3	3	3	2	3	3
244	B	5	2	3	2	2	5	3	2	1	2	1	1	5	1	1	5	5	1	2	2	3	3	1	3	1	5	1	1	0			1	4	4	3	2	3	4	4	4	3	3	3	3	3	3	4	3
245	B	5	1	3	2	3	5	1	3	1	4	2	4	5	3	3	5	5	3	4	2	3	3	2	3	3	8	0				2		4	4	5	3	2	2	2	3	3	4	4	4	4	4	4	5
246	B	5	1	1	2	1	4	2	1	2	4	4	1	5	1	3	5	5	1	5	2	1	1	2	1	0		0				3		6	5	2	2	2	4	3	3	3	4	4	4	3	3	4	4
247	B	5	2	2	2	2	5	1	4	2	3	1	1	5	3	3	5	5	3	3	1	2	2	1	2	1	1	1	1	0			1	4	1	3	2	3	3	3	3	4	4	4	4	4	3	3	3
248	B	5	2	3	2	2	5	3	3	2	4	2	3	4	2	3	4	4	2	5	2	3	3	2	3	1	1	1	1	1			1	4	7	3	4	3	4	4	4	4	3	3	3	3	3	4	3
249	B	5	1	3	2	1	4	1	3	1	5	2	2	5	3	3	5	5	3	2	2	3	3	2	3	0		0				3		6	2	5	4	4	4	4	4	4	3	3	3	3	4	4	4
250	B	5	1	3	1	3	4	4	2	1	3	2	4	5	2	3	5	5	2	5	2	3	3	2	3	0		1	1	0			1	5	3	4	3	2	3	3	3	3	4	3	3	3	3	3	5
251	A	6	2	4	2	2	4	3	2	1	4	4	3	5	1	1	5	5	1	4	1	3	3	1	3	0		1	0		1		2	6	4	2	3	3	4	3	4	4	4	3	3	3	5	4	3
252	A	6	2	3	2	2	4	1	2	1	3	2	2	4	3	3	4	4	3	5	2	2	2	2	3	0		0				2		5	2	4	3	4	1	3	2	3	3	3	2	2	3	4	5
253	A	6	2	4	1	3	5	2	1	3	3	1	1	5	1	1	5	5	3	5	3	3	3	3	2	1	3	1	1	0			1	6	2	5	3	4	4	3	4	3	4	4	4	4	4	4	3
254	A	6	2	2	2	2	4	2	3	1	4	2	4	5	3	3	5	5	3	2	1	3	3	1	2	0		1	0		1		1	6	2	3	5	4	2	2	4	2	3	3	3	3	2	3	4
255	A	6	1	3	1	3	4	1	2	1	3	1	1	5	1	1	5	5	1	5	1	2	2	1	3	0		1	1	1			2	6	1	5	3	3	3	3	3	3	4	3	4	4	4	4	5
256	A	6	2	2	2	2	4	2	1	2	2	4	1	4	3	3	5	4	3	5	2	3	3	2	2	0		1	1	0			1	6	1	4	5	5	5	4	4	4	3	3	4	3	4	3	3
257	A	6	2	4	1	3	5	4	1	2	3	2	2	4	2	3	4	4	2	4	1	3	3	1	2	1	9	1	0		1		1	5	4	4	4	2	3	3	3	3	3	2	3	2	3	3	4
258	A	6	1	4	2	1	4	1	2	1	4	2	4	4	2	2	5	4	2	5	1	2	2	1	3	0		1	1	0			2	5	1	4	4	2	3	3	3	3	5	5	4	4	4	5	3
259	A	6	2	4	1	2	4	5	1	2	5	4	1	4	3	3	5	4	3	2	2	3	3	2	2	0		0				2		5	6	4	2	3	3	3	3	3	4	4	4	4	4	4	3
260	A	6	2	5	2	1	5	2	3	1	5	1	1	5	1	3	5	5	1	4	3	1	1	3	3	1	2	1	1	1			1	6	2	5	1	4	4	5	2	2	3	3	3	4	4	3	3
261	A	6	1	5	2	2	5	1	4	1	3	2	3	5	3	3	5	5	3	4	1	3	3	1	2	1	1	0				2		6	8	4	2	2	2	3	3	2	4	3	3	4	5	4	3
262	A	6	2	4	1	1	5	3	1	2	3	1	1	5	1	1	4	5	1	5	2	3	3	2	2	2	3	1	1	1			1	6	1	3	2	3	2	2	3	3	4	3	3	3	4	3	4
263	A	6	1	4	2	1	4	1	4	2	4	2	4	5	2	3	5	5	2	5	2	3	3	2	3	0		0				4		4	4	3	4	4	3	3	4	3	4	4	3	4	4	4	5
264	A	6	2	2	2	1	5	1	4	1	5	3	3	4	3	3	4	4	3	2	2	1	1	2	4	2	2	0				2		4	2	3	4	2	3	4	4	5	5	5	5	5	5	5	4
265	A	6	2	3	2	1	4	1	2	1	4	2	2	5	2	3	5	5	2	4	2	3	3	2	3	0		0				4		4	1	4	2	3	2	3	2	2	4	4	4	4	4	4	5
266	A	6	1	4	2	1	5	4	2	1	3	1	4	5	3	3	5	5	3	4	3	2	1	2	3	1	2	1	0		1		1	4	5	4	4	2	4	3	3	4	4	3	3	4	4	4	3
267	A	6	2	4	2	2	4	1	2	1	3	1	3	5	1	3	5	5	1	5	2	1	3	2	3	0		1	1	0			3	4	4	3	4	4	4	4	4	4	3	3	3	4	4	4	5
268	A	6	2	5	1	2	4	1	3	1	3	2	4	4	3	3	4	4	3	4	2	3	1	2	2	0		0				2		5	3	4	3	3	3	3	3	3	3	3	3	3	3	3	3
269	A	6	2	3	2	2	4	3	2	2	4	3	4	5	1	3	5	5	3	2	2	3	2	1	2	0		0				5		5	1	4	4	3	3	3	4	5	5	5	5	5	5	5	3
270	A	6	1	4	1	1	5	2	3	2	4	1	3	5	1	1	4	5	1	3	1	2	3	1	3	1	3	1	1	1			1	5	2	4	5	3	3	4	3	3	4	3	4	4	4	4	5
271	A	6	2	4	1	2	4	1	1	2	5	1	4	5	3	3	5	5	3	5	1	3	2	1	2	0		0				2		5	3	4	4	4	3	4	4	4	3	4	4	4	4	3	4
272	A	6	1	1	2	1	4	3	2	1	3	1	1	5	1	3	5	5	1	5	2	1	3	2	2	0		0				2		8	1	4	3	3	3	3	3	3	5	5	5	5	3	5	4
273	A	6	1	3	1	3	5	4	3	2	2	1	4	5	3	3	5	5	3	4	3	2	2	1	3	0		0				3		5	3	4	4	4	4	4	3	3	4	4	5	4	5	5	4
274	A	6	2	2	2	1	4	1	3	1	2	1	1	5	1	1	5	5	1	4	2	1	2	4	2	0		1	0		1		1	6	7	5	3	2	3	2	3	2	5	4	5	5	5	5	5
275	A	6	2	4	2	2	4	1	2	1	5	2	2	4	3	3	5	4	3	2	2	3	3	2	3	0		1	1	1			1	7	2	5	5	4	5	3	3	5	5	5	5	5	5	5	5
276	B	6	1	3	2	1	5	2	4	1	5	1	4	5	1	1	5	5	1	3	2	1	2	4	2	1	3	0				6		8	5	2	2	4	2	4	3	3	4	3	4	3	3	3	4
277	B	6	1	3	2	2	4	3	2	1	5	2	2	5	2	3	5	5	2	4	1	2	2	1	2	0		1	1	1			1	6	3	5	4	3	4	3	4	4	4	3	3	4	4	3	4
278	B	6	2	5	2	3	5	4	2	1	5	3	1	5	3	3	5	5	3	5	1	3	3	2	3	2	1	1	1	0			2	4	4	4	3	4	4	4	3	3	4	4	4	4	4	4	3
279	B	6	2	4	2	1	5	1	3	1	5	1	4	5	1	1	5	5	1	2	1	2	2	1	4	1	2	1	1	1			1	4	1	4	3	2	4	4	4	3	3	4	4	5	4	4	3
280	B	6	2	2	1	2	4	1	2	3	5	2	2	5	2	2	5	5	2	4	2	3	3	2	3	0		1	1	1			1	5	2	4	2	2	2	3	2	3	3	2	3	3	3	2	3
281	B	6	2	3	2	2	2	1	1	2	5	1	1	3	3	3	5	3	3	4	1	2	2	1	3	3	1	1	1	0			3	4	1	3	4	3	5	4	4	4	4	5	5	5	3	5	3
282	B	6	2	3	2	1	4	3	2	1	5	1	3	4	1	3	4	4	3	4	4	2	2	1	2	4	2	1	1	1			2	6	1	3	3	2	3	3	3	3	3	3	3	4	5	4	4
283	B	6	2	3	2	3	5	1	4	1	5	3	4	5	3	3	5	5	3	5	2	3	3	1	3	3	1	1	0		1		3	6	3	3	5	5	5	5	5	5	3	3	3	3	4	2	3
284	B	6	2	3	2	2	3	3	1	2	5	1	4	4	1	1	5	4	3	2	4	2	4	1	2	0	1	1	1	0			3	4	4	3	3	2	3	4	4	2	4	5	5	4	4	4	5
285	B	6	2	3	2	2	4	2	1	2	5	2	3	4	2	3	4	4	2	4	1	2	3	2	2	0	4	0				3		6	4	3	3	2	3	3	3	3	3	4	4	3	3	4	5
286	B	6	2	2	2	3	3	3	2	1	3	2	2	5	3	3	5	5	3	4	2	3	3	1	3	0	1	0				5		6	2	3	3	4	4	4	3	4	5	4	4	4	4	4	4
287	B	6	2	3	2	2	4	2	3	1	2	1	1	5	1	3	5	5	3	4	1	2	3	1	2	3	5	1	1	1			3	4	4	5	5	3	3	3	3	3	4	3	3	5	4	4	4
288	B	6	1	3	1	3	3	3	4	3	4	1	4	4	1	1	5	4	1	5	2	3	1	3	3	3	9	1	1	0			2	6	3	6	4	3	3	4	4	3	3	4	4	3	5	4	3
289	B	6	2	2	2	2	3	3	3	4	4	2	2	4	3	3	5	4	3	2	1	2	3	2	2	0		0				4		4	8	3	3	3	3	4	4	3	4	5	5	4	4	4	4
290	B	6	2	4	2	3	3	3	1	2	3	1	3	4	1	1	5	4	1	5	1	2	2	1	2	3	1	1	1	1			3	4	8	3	3	2	2	2	3	3	4	4	3	5	4	4	4
291	B	6	1	3	2	1	5	1	1	3	4	2	4	5	2	3	5	5	2	4	1	3	1	2	3	0		0				2		4	2	3	5	4	4	5	4	3	4	3	5	4	4	4	3
292	B	6	2	1	2	2	4	1	1	2	5	2	2	4	3	3	4	4	3	5	1	4	3	1	4	0		0				4		4	6	3	3	4	4	2	4	4	4	3	3	5	4	3	4
293	B	6	1	4	2	1	3	1	1	2	3	3	3	5	1	3	5	5	1	2	2	3	3	2	3	3	2	1	1				3	6	2	3	4	3	4	5	5	5	3	4	4	3	3	3	4
294	B	6	2	3	2	2	3	3	3	2	4	1	4	4	1	1	5	4	1	5	1	3	3	1	3	4	1	1	1	1			4	4	4	3	4	4	3	3	4	3	3	3	4	5	4	4	4
295	B	6	1	3	2	1	3	3	1	3	3	2	2	5	3	3	5	5	3	3	1	3	3	1	3	0		0				4		4	4	3	5	4	4	4	4	4	3	3	3	3	4	3	4
296	B	6	2	4	2	1	4	1	1	3	3	3	3	3	1	3	3	3	1	5	3	1	1	3	1	5	1	0				2		4	5	3	3	2	4	3	2	3	3	3	3	3	3	3	2
297	B	6	2	4	2	1	3	3	2	1	4	1	4	4	1	1	5	4	3	2	2	3	3	2	3	3	5	1	1	1			3	6	1	3	4	4	4	2	3	3	3	1	1	3	3	3	4
298	B	6	1	3	2	1	3	3	1	2	3	1	1	5	3	3	5	5	3	4	1	2	2	1	2	4	1	1	1	0			4	4	1	3	1	2	1	3	3	4	4	3	3	4	4	3	5
299	B	6	2	5	2	1	3	3	1	2	2	2	3	5	2	2	5	5	2	5	2	1	1	2	2	0		1	1	0			3	4	2	3	1	4	3	2	4	5	3	4	4	4	4	4	4
300	B	6	1	4	2	2	3	2	1	2	3	1	4	5	3	3	5	5	3	5	1	3	3	1	3	3	1	0				2		4	3	3	4	3	3	3	4	3	4	4	3	3	3	3	5
301	A	7	2	4	2	2	2	3	1	3	4	2	3	4	2	2	5	4	2	5	2	3	1	2	2	0	1	0				1		4	4	3	4	3	4	3	4	4	3	4	4	4	4	4	3
302	A	7	1	3	2	2	3	1	1	4	5	2	2	5	2	2	5	5	2	2	1	3	3	2	2	0		1	1	0			4	3	3	3	4	2	4	4	4	3	5	5	5	5	5	5	4
303	A	7	2	4	2	1	4	3	2	1	5	3	4	4	1	3	4	4	3	5	1	3	1	2	3	3	1	0				6		4	2	3	4	2	3	1	3	3	3	2	2	3	3	2	4
304	A	7	1	5	2	2	4	3	2	1	3	1	3	5	3	3	5	5	3	4	1	3	2	1	2	0		1	1	1			5	2	2	3	4	3	3	3	2	2	4	4	4	4	4	4	3
305	A	7	1	2	2	1	2	3	2	3	3	2	2	5	1	1	5	5	1	4	1	3	3	1	3	0		0				2		6	3	3	3	3	3	3	4	3	5	5	5	5	5	5	3
306	A	7	2	1	2	3	3	3	4	3	4	2	4	5	2	2	5	5	2	5	2	3	2	1	2	0		1	0		1		2	6	3	3	4	3	3	4	3	4	4	4	3	3	4	4	4
307	A	7	2	3	2	1	3	1	1	2	5	1	1	3	3	3	4	3	3	5	2	3	3	2	2	3	1	0				3		4	8	3	4	3	4	3	3	3	4	4	4	3	3	4	3
308	A	7	1	4	2	2	1	2	4	1	4	2	2	5	1	1	5	5	1	2	1	3	2	1	3	0		0				2		2	3	3	4	2	4	4	3	3	3	3	2	3	2	3	3
309	A	7	1	4	2	2	4	3	1	1	3	2	4	4	1	3	5	4	1	5	2	3	2	4	4	0		0				3		4	2	3	2	3	2	3	3	3	4	3	3	3	3	2	5
310	A	7	2	4	2	1	3	3	3	4	3	1	1	5	3	3	5	5	3	5	1	3	3	2	3	5	1	0				2		1	2	2	3	3	4	4	3	3	4	4	4	3	3	3	4
311	A	7	1	4	2	1	3	3	2	1	3	1	4	4	1	3	5	4	3	5	2	3	2	4	3	3	3	0				3		4	2	5	3	4	2	4	3	2	4	4	4	5	3	4	3
312	A	7	1	4	2	1	3	3	2	1	4	1	1	4	2	2	5	4	2	2	2	3	2	1	3	3	1	1	1	0			3	4	3	3	2	2	2	3	3	3	4	3	3	3	4	4	3
313	A	7	2	1	2	1	3	3	1	3	4	1	1	5	3	3	5	5	3	3	2	3	3	2	3	3	1	1	1	1			3	4	3	2	4	4	4	3	4	3	4	3	3	3	4	3	4
314	A	7	2	2	2	1	5	2	1	1	5	1	4	5	1	1	5	5	1	5	2	1	2	1	1	3	1	1	1	1			3	1	2	3	5	5	5	5	5	5	5	5	5	5	5	5	3
315	A	7	1	2	2	2	2	3	1	1	3	3	2	4	1	1	5	4	1	5	1	2	3	2	2	0		1	1	0			2	6	3	5	4	4	3	4	4	4	4	4	4	4	4	4	4
316	A	7	2	2	2	2	3	3	2	1	2	1	1	5	3	3	5	5	3	4	2	3	2	1	3	5	3	0				3		6	5	3	4	3	3	3	4	3	4	5	4	4	4	3	4
317	A	7	2	2	2	2	4	3	2	1	2	2	4	4	1	1	5	4	1	2	2	3	2	1	3	0		1	1	0			2	4	4	5	5	4	5	5	4	5	3	3	3	3	3	3	3
318	A	7	1	3	2	1	5	2	2	3	5	2	2	4	1	3	5	4	1	4	2	3	3	1	3	0		0				5		4	3	2	4	4	4	4	5	4	3	3	2	3	2	2	4
319	A	7	2	3	2	2	5	3	2	1	5	1	4	4	3	3	5	4	3	5	1	3	4	1	3	4	1	0				1		4	3	3	4	3	3	3	4	3	3	3	2	3	4	3	4
320	A	7	1	3	2	1	2	3	3	2	5	2	2	4	2	3	5	4	2	4	2	2	3	2	2	0		0				5		6	3	3	5	3	4	3	5	5	4	4	4	4	3	4	5
321	A	7	2	5	2	3	3	3	1	2	5	1	1	4	3	3	4	4	3	2	3	3	3	1	3	3	1	1	1	1			3	4	1	3	4	4	4	3	3	4	4	3	3	4	3	3	4
322	A	7	2	2	2	1	4	3	1	2	5	2	4	5	2	2	5	5	2	4	1	3	3	1	3	0		1	1	1			4	3	8	3	3	2	3	3	4	4	4	4	4	4	4	3	5
323	A	7	1	3	2	2	3	3	1	3	5	2	2	5	2	3	5	5	2	4	1	2	1	3	2	0		1	1	1			4	3	1	3	5	4	4	4	4	4	4	5	4	4	4	4	4
324	A	7	2	3	2	2	5	3	4	1	5	1	5	5	1	1	5	5	1	5	2	3	3	2	3	3	3	1	1	0			3	4	3	3	4	3	3	3	4	3	4	2	2	4	4	3	5
325	A	7	1	3	2	1	3	3	1	2	5	1	3	5	1	3	5	5	1	5	1	3	2	1	3	4	1	1	1	1			4	4	3	3	5	5	5	4	5	5	4	3	3	2	4	4	5
326	B	7	2	2	2	1	3	3	3	1	5	2	2	5	3	3	5	5	3	2	1	2	1	2	2	0		1	1	1			3	4	2	3	2	2	3	3	3	3	3	3	2	3	3	2	3
327	B	7	2	2	2	1	3	3	3	1	5	3	1	5	1	3	5	5	1	5	2	3	3	1	3	4	1	0				4		4	2	3	4	2	4	3	3	3	4	5	4	4	5	4	4
328	B	7	1	2	2	1	3	1	2	3	5	2	3	4	1	3	5	4	1	5	3	1	3	2	2	0		0				2		4	7	3	3	2	2	2	3	3	4	3	3	3	4	2	3
329	B	7	2	4	2	1	4	3	1	2	2	1	5	4	3	3	4	4	3	5	1	3	3	1	2	3	1	1	1	0			3	4	5	3	4	4	5	4	5	5	5	4	4	4	4	4	3
330	B	7	1	1	2	2	5	2	1	3	5	3	1	5	2	3	5	5	2	2	2	3	3	2	3	3	1	1	1	1			3	4	1	3	4	3	3	3	4	3	4	4	3	4	5	4	3
331	B	7	2	2	2	2	3	3	1	2	4	2	4	5	3	3	5	5	3	5	2	3	1	2	2	0		0				5		4	4	3	4	3	3	2	2	2	3	3	5	4	4	3	3
332	B	7	2	1	2	2	3	3	1	2	3	1	1	5	2	3	5	5	2	5	2	1	3	2	2	3	1	1	1	0			3	4	2	3	4	4	4	3	4	4	4	4	3	4	5	4	3
333	B	7	1	1	2	1	2	1	2	4	2	2	4	4	2	2	5	4	2	4	2	3	1	2	3	0		0				1		4	2	3	4	4	4	4	4	4	4	4	2	3	4	3	3
334	B	7	2	3	2	2	4	3	1	2	4	1	3	5	1	3	5	5	1	2	3	2	2	1	2	5	1	1	1	1			5	3	2	3	3	4	2	3	3	4	5	4	4	3	5	4	4
335	B	7	2	2	2	1	3	1	3	2	4	3	1	4	3	3	5	4	3	5	2	1	3	1	3	3	1	1	0		1		3	4	1	3	2	2	3	3	3	3	3	3	5	4	4	4	5
336	B	7	2	3	2	3	5	3	2	1	3	3	4	4	1	3	5	4	1	5	2	3	2	1	2	3	1	1	0		1		3	3	3	3	3	3	3	3	4	3	4	4	5	3	4	4	4
337	B	7	2	2	2	1	4	3	1	2	4	2	3	5	2	3	5	5	2	5	2	3	3	2	2	5	1	0				3		3	6	3	4	3	3	4		3	3	3	2	3	3	2	4
338	B	7	2	3	2	2	3	3	3	2	5	3	1	4	3	3	5	4	3	5	1	2	2	1	3	3	1	0				5		3	1	3	2	2	2	2	2	2	3	3	3	3	3	3	5
339	B	7	2	3	2	1	2	2	3	1	3	1	4	5	1	1	5	5	1	2	2	1	2	4	4	3	10	1	0		1		5	2	2	3	3	3	3	3	3	3	4	4	3	5	4	4	5
340	B	7	2	3	2	1	5	3	3	1	4	2	3	4	1	3	5	4	1	5	3	2	3	2	3	0	1	0				5		3	2	3	4	4	2	4	4	2	4	4	3	3	2	3	3
341	B	7	2	3	2	1	5	2	2	1	3	1	4	4	3	3	5	4	3	5	2	1	2	4	3	5	2	0				4		4	3	3	2	3	2	3	2	2	4	5	4	4	5	4	4
342	B	7	2	3	1	1	2	3	2	1	3	2	2	4	1	3	5	4	1	5	2	3	2	1	3	0		0				3		6	4	3	4	3	3	4	4	4	5	4	4	5	4	4	3
343	B	7	2	3	1	1	3	1	1	1	4	3	3	4	1	1	5	4	1	5	2	1	3	2	1	3	3	1	1	0			2	6	3	5	3	3	3	2	3	2	4	4	3	5	4	3	4
344	B	7	2	3	1	2	2	1	2	1	3	1	4	5	3	3	5	5	3	2	1	2	2	1	2	5	9	1	1	0			1	6	6	2	4	3	4	4	4	4	4	4	3	5	4	4	3
345	B	7	2	3	1	1	5	3	1	2	2	3	1	4	1	1	4	4	1	4	1	3	3	2	3	3	3	1	1	1			1	6	3	3	3	3	4	3	4	3	3	3	3	3	3	4	2
346	B	7	1	4	1	1	2	1	1	2	3	1	3	4	1	3	4	4	1	3	1	2	2	1	2	5	2	0				3		6	2	5	4	3	3	3	3	2	3	3	3	3	3	3	3
347	B	7	2	1	2	1	5	1	2	1	4	3	4	5	3	3	5	5	3	4	2	3	2	1	3	4	2	1	0		1		4	4	6	3	3	2	3	3	2	3	3	2	1	3	4	2	4
348	B	7	2	3	1	1	2	1	1	3	5	1	1	3	2	2	4	3	2	2	1	2	3	1	2	3	2	0				3		6	4	3	4	2	3	3	3	3	3	3	3	3	3	3	4
349	B	7	1	4	2	1	3	1	2	3	5	1	3	4	3	3	5	4	3	5	4	2	4	1	2	3	1	1	1	0			3	4	4	5	4	3	3	3	4	3	4	4	3	2	3	3	3
350	B	7	2	4	2	2	3	1	1	3	3	1	4	4	2	2	5	4	2	5	2	3	3	2	3	4	2	0				6		4	3	3	4	4	4	2	3	3	5	5	5	5	5	5	3
351	A	8	1	4	2	1	4	3	1	2	3	1	1	5	2	3	5	5	2	4	4	2	3	1	2	5	1	1	1	0			5	4	3	3	2	4	3	4	4	3	3	3	4	3	4	3	4
352	A	8	2	5	1	1	4	1	1	2	4	1	3	5	1	1	5	5	1	2	1	2	3	1	2	4	2	1	1	1			2	6	6	3	3	2	3	2	2	3	1	3	3	1	3	3	4
353	A	8	1	3	2	1	2	1	1	2	5	2	4	4	3	3	4	4	3	4	2	3	1	3	3	3	2	0				3		6	2	3	3	3	5	3	3	3	4	4	4	4	4	4	4
354	A	8	1	3	1	1	3	1	1	2	4	1	1	4	1	1	5	4	1	4	1	2	3	2	2	3	2	1	1	0			3	6	5	3	2	4	4	3	3	3	4	4	4	4	4	4	4
355	A	8	2	2	1	2	4	3	1	3	3	3	3	4	2	2	2	4	2	3	2	3	2	1	3	6	2	0				4		6	7	3	3	4	3	4		2	4	4	4	4	4	4	3
356	A	8	1	2	2	1	4	2	1	2	3	1	4	4	3	3	4	4	3	5	1	2	1	2	2	5	1	0				4		4	3	3	4	4	3	3	5	3	3	2	3	3	3	2	5
357	A	8	2	1	1	1	3	3	1	4	3	2	3	4	1	3	3	4	1	5	1	2	3	1	2	3	3	1	0		1		3	6	3	4	3	3	3	3	4	4	4	3	2	3	1	3	3
358	A	8	1	4	1	1	2	2	2	1	4	3	5	4	1	1	4	4	1	4	1	3	3	2	3	5	3	1	1	1			2	6	5	5	3	3	2	3	3	3	3	4	4	4	4	4	3
359	A	8	2	2	2	1	2	3	1	2	4	2	2	4	3	3	5	4	3	5	1	4	4	1	4	0		0				2		6	6	3	4	2	3	2	3	2	4	4	4	4	4	4	3
360	A	8	2	3	1	1	3	3	1	3	5	1	3	4	1	1	5	4	1	2	2	3	3	2	3	3	2	1	1	0			1	4	3	3	2	3	3	2	3	3	5	5	5	5	5	5	3
361	A	8	1	3	1	1	2	1	3	3	3	3	2	4	1	3	3	4	1	5	1	3	3	1	3	0		0				3		4	3	3	2	2	2	3	3	2	5	5	5	5	5	5	5
362	A	8	1	4	2	1	4	1	1	3	5	1	1	4	3	3	3	4	3	4	1	3	3	1	3	3	1	1	1	0			3	2	2	3	4	4	3	5	4	4	3	4	3	2	1	4	4
363	A	8	2	2	2	1	3	3	1	2	4	4	4	4	1	3	3	4	1	5	3	1	1	3	1	4	2	1	1	1			4	4	5	3	5	5	5	1	5	5	3	3	3	2	2	4	3
364	A	8	1	1	2	1	3	1	1	3	3	1	1	5	1	1	5	5	1	2	2	3	3	2	3	3	1	1	1	1			3	4	3	5	5	3	3	3	3	3	4	2	1	3	3	3	3
365	A	8	2	5	2	2	2	1	2	1	2	1	1	4	3	3	4	4	3	4	1	2	2	1	2	4	2	1	1	0			3	4	4	3	2	1	1	3	3	3	5	4	3	3	4	3	4
366	A	8	2	5	2	1	4	1	2	1	4	2	4	5	2	3	5	5	2	5	2	1	1	2	1	4	3	1	1	1			2	6	3	3	4	3	4	3	3	3	3	3	3	4	3	3	5
367	A	8	2	3	2	1	2	1	3	2	4	1	1	4	3	3	5	4	3	5	1	3	3	1	3	5	3	1	0		1		1	4	4	3	3	3	4	3	3	4	3	3	3	3	2	3	3
368	A	8	2	5	2	1	3	3	2	1	3	1	1	5	2	3	5	5	2	5	2	3	3	2	3	3	3	1	1	0			3	4	4	3	5	4	5	5	5	5	4	4	3	4	4	4	5
369	A	8	2	3	2	1	2	1	3	1	4	1	4	5	2	2	5	5	2	5	1	3	3	1	3	3	3	0				6		6	8	3	3	3	3	3	3	3	4	3	3	3	3	3	3
370	A	8	2	3	2	1	3	1	1	3	5	2	2	5	1	3	5	5	1	2	1	3	3	1	3	0		1	1	1			3	6	4	3	1	1	2	3	2	2	3	3	2	3	3	4	4
371	A	8	2	4	2	1	3	1	2	1	3	2	2	5	3	3	5	5	3	4	1	3	3	1	3	0		1	1	0			2	4	3	3	4	4	4	4	4	2	4	4	3	3	2	2	5
372	A	8	2	4	2	1	2	3	2	4	4	4	4	5	1	3	5	5	1	5	1	3	3	1	3	4	2	1	1	1			4	4	3	3	3	3	2		4	3	4	5	5	5	5	4	3
373	A	8	2	3	2	2	3	3	3	1	3	2	2	4	2	2	4	4	2	4	2	3	3	2	3	0		0				2		4	4	3	4	3	4	4	4	4	3	3	3	3	3	3	4
374	A	8	2	3	2	1	2	3	2	3	3	1	1	5	3	3	5	5	3	2	2	3	3	2	3	3	2	1	1	0			5	4	4	3	1	3	2	5		3	3	3	3	3	3	3	3
375	A	8	2	3	2	1	5	3	1	2	4	1	4	4	1	1	5	4	1	5	1	3	3	1	3	6	1	0				5		4	3	3	5	3	5	4	4	5	4	3	3	4	3	3	3
376	B	8	2	4	1	1	4	3	1	2	3	2	2	5	1	3	5	5	1	5	2	3	3	2	3	5	9	0				4		6	3	3	2	3	2	3	2	3	5	5	5	5	5	5	3
377	B	8	2	2	2	1	3	3	3	1	2	1	1	5	3	3	5	5	3	3	1	3	3	1	3	3	1	1	0		1		3	6	1	3	3	2	2	2	3	3	3	3	3	3	3	3	3
378	B	8	2	2	1	1	3	2	2	1	3	1	4	4	1	1	4	4	1	3	2	3	3	2	2	3	8	0				3		6	5	3	3	4	3	3	3	3	5	5	5	5	5	5	4
379	B	8	2	3	2	2	4	1	1	2	4	1	1	5	1	3	5	5	1	5	2	3	3	2	2	5	1	1	1	1			5	6	3	3	2	3	3	3	3	3	5	3	3	4	4	3	5
380	B	8	2	1	2	1	3	3	3	1	5	2	2	4	3	3	4	4	3	2	2	3	3	2	3	3	4	0				3		6	4	5	4	2	4	3	3	2	4	3	3	3	4	4	4
381	B	8	1	3	2	1	2	1	3	1	5	1	3	5	1	3	5	5	1	5	2	1	1	2	2	5	5	0				6		6	7	6	2	2	3	2	2	2	4	3	4	4	4	4	5
382	B	8	2	3	2	1	1	3	2	1	3	1	4	5	1	1	5	5	1	5	1	2	2	1	2	6	5	1	1	1			2	4	2	2	3	3	3	3	3	3	4	4	3	3	4	3	3
383	B	8	2	2	2	1	3	3	3	1	3	2	2	5	3	3	5	5	3	4	2	3	3	2	3	3	2	1	1	0			1	4	4	3	1	1	3	3	2	4	4	3	3	3	3	3	5
384	B	8	2	3	1	1	4	1	1	2	4	1	3	5	2	2	5	5	2	4	2	3	3	2	2	3	3	1	1	0			3	6	2	3	3	2	3	3	3	2	4	3	3	3	3	4	3
385	B	8	1	4	2	2	2	3	4	2	5	1	4	4	3	3	3	4	3	4	2	3	3	2	3	3	2	0				3		4	3	3	3	2	2	2	2	2	3	4	4	1	2	4	3
386	B	8	2	1	2	1	3	1	1	3	4	2	2	4	2	3	4	4	2	2	1	3	3	1	2	5	3	0				4		4	2	5	5	2	5	4	4	5	3	4	3	3	3	4	5
387	B	8	1	2	2	1	4	1	1	2	3	4	1	5	2	2	4	5	2	5	2	2	2	2	2	6	3	0				3		4	5	3	3	3	3	3	3	3	3	3	3	3	3	3	4
388	B	8	2	2	1	1	4	2	1	2	3	1	3	5	1	1	5	5	1	4	3	3	3	3	3	5	3	0				4		4	1	3	4	4	3	4	4	3	4	4	3	3	5	4	4
389	B	8	1	5	2	1	3	1	2	1	3	1	4	5	3	3	5	5	3	5	1	3	3	1	4	3	2	1	1	1			3	4	8	3	2	3	2	4	4	2	3	3	2	2	2	3	4
390	B	8	2	5	2	2	3	3	4	1	4	2	2	5	1	1	5	5	1	5	1	2	2	1	3	0		1	1	0			2	4	1	3	3	2	2	2	2	2	4	3	4	4	3	3	5
391	B	8	2	4	2	1	5	3	1	2	4	1	1	4	2	3	5	4	2	2	2	3	3	2	3	4	1	0				5		4	7	3	2	2	3	3	3	3	5	5	5	4	4	4	5
392	B	8	1	5	2	1	3	1	1	3	5	2	3	4	3	3	4	4	3	5	1	3	3	1	3	4	1	0				6		6	5	5	2	2	2	2	2	5	3	3	2	4	4	2	4
393	B	8	2	2	2	1	4	1	1	1	3	1	4	4	1	1	5	4	1	4	1	2	2	1	2	3	2	1	1	0			3	6	4	3	3	3	3	3	3	3	2	3	3	3	3	3	4
394	B	8	1	4	1	1	3	1	1	1	3	1	1	5	1	3	5	5	1	2	2	3	3	2	3	5	3	1	1	1			2	6	6	6	2	3	4	4	3	4	4	4	4	4	4	3	3
395	B	8	1	4	2	1	4	3	4	1	4	2	3	3	3	3	4	3	3	5	3	1	1	3	1	3	1	0	1	0		4		4	2	3	3	3	3	4	5	4	4	3	3	3	3	4	3
396	B	8	2	5	2	1	4	1	1	3	5	2	5	4	1	1	3	4	1	5	1	3	1	2	3	3	1	0				2		3	3	3	3	3	4	3	3	3	4	3	1	3	2	3	3
397	B	8	1	3	2	1	3	1	1	2	3	1	5	4	2	3	4	4	2	2	2	3	3	2	3	3	1	0				3		4	2	1	4	3	3	3	3	3	3	4	3	2	1	3	3
398	B	8	2	3	2	1	4	1	2	1	4	2	3	5	1	1	5	5	1	4	2	3	1	2	3	0		1	0		1		2	3	5	6	5	2	1	4	2	2	3	4	2	3	3	3	4
399	B	8	2	4	1	1	3	1	1	2	3	1	1	4	3	3	4	4	3	5	2	1	2	1	1	3	3	0				4		4	4	3	4	4	4	3	4	4	3	2	3	3	3	3	3
400	B	8	2	4	2	2	4	1	1	2	3	1	1	4	1	1	4	4	1	3	2	3	3	1	3	3	2	1	1	1			3	4	3	3	4	4	4	4	3	3	3	3	3	3	3	3	5
401	A	9	2	4	2	1	3	2	1	3	4	1	4	5	1	3	5	5	1	4	3	2	2	1	2	3	1	0				3		4	3	3	4	3	3	5	1	1	5	5	5	5	3	3	5
402	A	9	2	4	2	1	4	2	1	2	3	1	3	4	3	3	5	4	3	2	2	1	3	2	1	4	2	0				4		6	4	6	3	3	4	4	3	3	4	4	4	4	4	4	4
403	A	9	2	4	1	1	2	3	1	3	2	2	2	4	2	2	5	4	2	4	2	3	2	1	3	0		0				4		4	5	3	3	3	4	4	4	2	5	5	3	2	4	4	4
404	A	9	1	4	1	1	5	3	4	1	3	4	2	4	3	3	4	4	3	5	2	3	2	4	3	0		1	1	0			1	4	8	5	2	2	3	3	3	2	3	3	3	3	2	2	3
405	A	9	2	3	2	1	3	3	4	2	4	2	4	5	2	2	4	5	2	3	1	2	3	2	2	6	2	1	1	1			4	4	3	6	3		3	3	3	2	4	4	4	4	4	4	4
406	A	9	2	4	1	1	3	3	2	1	5	2	2	5	2	3	5	5	2	5	1	3	2	4	3	0		1	1	1			1	5	4	4	2	3	2	2	3	2	3	3	3	3	3	4	4
407	A	9	1	3	1	1	3	3	2	1	5	1	1	5	1	1	5	5	1	2	2	1	2	1	3	3	2	1	1	0			1	6	2	4	4	4	5	4	4	4	2	1	1	1	2	3	3
408	A	9	2	3	1	2	3	1	3	1	3	2	5	5	3	3	5	5	3	5	3	2	3	2	2	0		1	1	0			2	6	2	5	4	3	4	4	4	3	4	3	3	4	3	4	4
409	A	9	2	3	1	1	4	1	1	3	3	1	1	5	1	1	5	5	1	4	2	1	2	1	2	0		1	1	1			1	4	3	5	3	3	4	2	3	2	3	2	2	3	3	3	4
410	A	9	2	4	2	1	3	3	1	3	4	1	1	4	2	3	4	4	2	5	2	3	3	2	3	0		1	0		1		2	4	5	3	2	2	2	2	3	3	4	4	4	4	3	3	4
411	A	9	1	1	2	1	3	1	1	2	5	2	3	5	3	3	5	5	3	5	2	1	2	1	2	6	1	1	1	1			2	4	1	1	3	3	3	3	3	3	3	2	2	3	3	2	4
412	A	9	2	3	2	1	1	1	4	2	4	4	1	4	1	1	5	4	1	2	1	2	2	1	2	0		1	1	0			1	4	4	3	4	4	4	4	4	4	3	3	3	3	3	3	2
413	A	9	1	1	2	1	3	3	3	1	3	1	4	4	1	3	5	4	1	5	1	3	3	1	3	0		1	1	1			2	4	4	5	4	3	3	3	4	3	3	3	3	3	3	3	4
414	A	9	2	4	1	2	3	3	1	4	3	2	3	4	3	3	4	4	3	5	1	2	4	1	2	0		0				3		5	2	5	4	2	4	3	4	4	4	4	4	4	4	4	5
415	A	9	1	2	2	1	1	1	1	2	3	1	1	5	1	3	5	5	1	4	2	3	3	2	3	5	1	1	1	1			5	4	2	3	4	4	4	4	4	3	4	4	5	5	4	4	4
416	A	9	2	2	2	1	3	3	2	2	4	2	2	4	2	2	4	4	2	5	1	2	3	1	2	0		1	0		1		4	4	2	3	4	3	4	3	4	4	4	3	4	3	2	3	5
417	A	9	1	2	2	1	3	2	2	2	4	1	5	5	1	3	5	5	1	2	4	2	3	1	2	4	2	0				5		3	3	3	4	3	4	3	3	2	4	4	1	3	2	2	3
418	A	9	2	3	2	1	3	3	1	2	5	4	1	5	3	3	5	5	3	4	2	3	1	3	3	0		1	1	1			1	4	3	4	3	3	4	3	3	3	4	4	4	5	4	4	4
419	A	9	1	3	1	1	3	3	2	1	3	1	5	5	1	1	5	5	1	4	4	2	3	2	4	0		1	1	0			0	4	4	5	4	3	3	3	3	3	3	3	4	4	4	3	4
420	A	9	1	5	2	2	5	1	1	3	2	2	3	5	1	3	5	5	1	5	1	2	2	1	3	7	3	1	1	1			0	6	4	5	3	3	3	3	4	4	4	3	4	4	5	5	3
421	A	9	2	2	2	1	4	3	4	2	2	2	2	4	3	3	4	4	3	5	2	3	1	2	3	3	1	0				2		1	6	3	3	3	4	3	3	3	4	4	4	4	3	3	3
422	A	9	1	1	2	1	4	1	1	3	5	1	4	4	2	3	5	4	2	2	1	2	3	1	2	5	2	0	0		1		2	4	8	6	4	4	2	3	4	4	4	4	5	4	4	4	4
423	A	9	1	1	1	1	4	4	2	4	5	2	2	4	3	3	4	4	3	4	2	3	3	2	3	0		0				4		5	3	4	4	4	3	3	4	3	4	4	4	4	3	3	3
424	A	9	2	4	1	1	4	1	1	3	5	1	4	5	2	3	5	5	2	4	1	2	2	1	2	3	5	1	1	0			1	6	6	3	4	3	4	2	3	3	2	3	2	3	3	3	3
425	A	9	1	4	2	2	4	1	1	2	5	1	1	4	2	2	4	4	2	5	1	2	2	1	2	4	3	0				4		4	6	4	3	4	4	4	3	4	4	5	4	4	3	4	5
426	B	9	2	4	2	1	5	3	2	4	5	3	3	4	1	3	5	4	1	4	1	3	3	1	3	5	1	0				4		4	2	3	3	2	3	3	3	3	3	3	2	3	3	3	4
427	B	9	1	4	2	1	4	3	1	2	5	2	4	5	3	3	5	5	3	2	1	4	4	1	4	3	3	0				4		4	4	5	4	3	3	3	3	3	3	3	2	3	3	3	3
428	B	9	1	2	2	1	3	3	1	2	5	1	1	4	1	1	5	4	1	3	2	3	3	2	3	4	1	1	1	0			4	3	2	3	2	3	3	2		3	4	4	4	4	4	4	3
429	B	9	2	4	2	1	4	2	1	4	5	2	3	4	2	3	4	4	2	5	1	3	3	1	3	5	1	1	1	1			5	4	2	3		3	4	4	3	3	4	5	4	4	4	4	4
430	B	9	1	4	2	1	4	3	2	3	5	2	4	4	3	3	5	4	3	5	1	3	3	1	2	3	1	0				4		3	1	3	2	2	2	2	3	2	3	4	2	2	4	3	3
431	B	9	2	2	2	1	4	3	2	1	5	1	1	5	1	1	5	5	1	4	3	1	1	3	2	5	2	1	1	0			1	4	2	5	2	4	3	4	2	4	4	3	2	4	4	3	4
432	B	9	1	1	2	1	3	3	4	2	5	2	3	2	1	3	4	2	1	4	2	3	3	2	3	0		0				1		4	3	5	4	3	4	4	3	4	3	3	3	3	3	3	4
433	B	9	2	1	2	1	4	3	4	1	3	2	4	5	3	3	5	5	3	2	1	2	2	1	2	4	1	1	0		1		4	2	2	3	4	4	4	4	4	4	4	4	4	3	4	4	3
434	B	9	2	1	2	1	5	3	3	1	2	2	2	5	1	3	5	5	1	3	2	1	1	2	2	0		1	1	1			2	4	8	5	2	4	3	3	4	3	3	3	3	3	3	3	4
435	B	9	1	3	2	2	3	1	1	3	4	2	3	3	2	2	4	3	2	4	1	3	3	1	3	0		0				3		4	6	3	4	4	5	4	5	4	4	4	4	3	4	3	4
436	B	9	2	3	2	1	4	3	2	4	4	1	4	4	3	3	5	4	3	5	2	3	3	2	2	4	1	0				4		6	1	3	4	2	4	2	3	3	4	4	4	4	5	4	5
437	B	9	1	5	1	1	2	1	2	3	3	2	4	4	1	1	5	4	1	2	1	3	3	1	3	4	3	0				2		6	87	5	3	3	3	3	3	2	4	3	2	2	3	2	4
438	B	9	2	3	2	1	4	3	3	2	4	2	2	5	3	3	5	5	3	4	1	3	3	1	2	4	1	0				4		4	4	3	2	2	2	2	3	2	3	2	3	3	3	3	5
439	B	9	1	3	2	1	3	3	4	1	5	2	4	4	1	3	5	4	1	4	1	3	3	1	2	3	1	1	1	0			3	3	1	3	3		3	4	4	4	5	4	4	4	5	4	4
440	B	9	2	3	2	1	4	1	1	2	3	2	2	5	1	1	5	5	1	4	1	3	3	1	3	3	1	1	0		1		4	3	1	3	3	3	4	3	3	3	5	4	3	3	4	4	5
441	B	9	2	1	2	1	3	1	1	3	4	3	5	5	3	3	5	5	3	5	2	3	3	2	4	5	3	1	1	0			3	4	2	3	4	4	4	3	3	4	3	2	2	3	4	2	5
442	B	9	1	2	2	2	5	3	4	1	3	2	3	5	2	2	5	5	2	2	2	3	3	2	3	4	1	1	1	0			4	4	2	3	2	2	3	3	3	3	4	4	4	4	4	4	3
443	B	9	2	3	2	1	2	3	4	4	3	2	2	3	3	3	4	3	3	4	1	3	3	1	3	0		1	1	1			2	4	3	3	4	3	3	4	3	3	4	5	4	3	2	4	4
444	B	9	1	3	1	1	2	3	3	2	4	2	5	4	2	2	4	4	2	4	2	3	3	2	3	0		0				4		6	4	3	2	2	3	2	3	3	4	3	3	3	4	3	3
445	B	9	1	3	2	1	4	2	1	2	3	2	3	4	2	3	4	4	2	4	1	3	3	1	3	4	1	1	1	1			4	4	2	3	3	4		3	3	4	3	3	2	4	3	4	3
446	B	9	1	4	2	1	3	3	4	2	2	2	2	4	1	1	5	4	1	5	2	3	1	2	3	3	1	0				4		4	2	3	4	4	4	4	4	4	4	4	4	4	4	3	3
447	B	9	2	3	2	1	3	3	4	3	3	1	4	4	3	3	4	4	3	2	2	3	3	2	3	2	1	0				4		4	5	3	2	3	4	3	3	3	3	3	2	3	4	4	3
448	B	9	1	4	2	1	3	3	4	1	4	2	3	4	1	3	4	4	1	5	2	3	1	2	3	0		0				2		4	3	6	4	3	3	2	3	3	4	3	3	4	4	4	3
449	B	9	1	2	1	1	4	3	1	2	5	1	1	5	2	2	5	5	2	4	2	1	2	1	1	4	8	1	0		1		1	5	1	4	4	3	4	3	4	3	4	4	3	4	4	4	3
450	B	9	2	3	1	1	3	2	4	1	5	2	4	5	3	3	5	5	3	5	1	2	3	1	2	0		1	1	1			1	5	3	4	4	3	5	4	4	5	4	4	4	4	4	3	4
451	A	10	1	2	2	1	3	3	4	1	3	1	3	5	1	1	5	5	1	2	2	3	2	1	3	4	9	1	1	1			4	4	3	3	3	2	2	3	2	3	3	3	2	3	3	3	5
452	A	10	2	4	2	2	4	1	1	3	3	2	4	4	1	3	5	4	1	5	2	3	3	2	3	5	1	0				4		4	4	3	5	5	4	5	4	4	3	3	3	4	4	3	4
453	A	10	2	4	2	1	2	1	1	2	4	1	1	4	3	3	4	4	3	3	2	3	2	1	3	4	1	0				3		4	3	3	4	4	4	3	4	4	2	1	1	1	1	2	4
454	A	10	1	4	2	1	2	2	1	2	5	1	3	5	1	3	4	5	1	5	1	3	2	4	3	5	5	1	1	0			1	8	1	3	4	2	4	3	3	3	4	3	3	3	4	4	5
455	A	10	1	5	1	1	1	1	1	2	4	1	4	4	3	3	5	4	3	2	2	2	3	2	2	3	6	0				4		6	7	6	4	4	4	4	4	4	3	2	3	4	3	3	5
456	A	10	2	5	1	1	4	3	1	3	3	2	2	3	1	3	2	3	1	4	3	3	2	4	2	3	7	0				4		7	4	3	4	2	3	3	4		3	3	3	3	3	3	3
457	A	10	1	4	2	1	4	3	2	1	3	3	3	4	1	1	5	4	1	5	1	3	2	1	3	0		0				1		6	4	5	2	2	3	2	2	2	4	4	4	4	4	4	4
458	A	10	2	4	2	1	2	2	1	3	3	1	4	4	3	3	4	4	3	5	1	2	3	2	2	0		1	1	0			4	6	2	3	4	4	4	4	4	4	3	5	4	5	5	4	3
459	A	10	2	2	2	2	4	3	1	3	4	2	2	3	2	3	3	3	2	5	2	3	2	1	2	4	1	0				4		4	2	3	4	3	4	3	4	4	5	5	4	5	5	4	4
460	A	10	1	3	2	1	5	1	2	1	4	2	4	4	3	3	5	4	3	2	1	3	3	2	3	7	1	1	0		1		7	4	3	3	4	4	4	3	4	4	3	3	3	3	3	3	3
461	A	10	2	4	2	1	3	2	1	2	5	1	5	4	2	2	4	4	2	5	1	2	2	1	2	5	2	0				2		4	8	5	4	4	4	3	3	3	5	5	4	5	5	5	2
462	A	10	1	4	2	1	3	3	1	3	3	2	5	5	2	3	5	5	2	4	2	3	2	1	3	3	1	1	1	1			3	3	1	3	4	4	4	4	4	4	4	3	2	4	4	4	3
463	A	10	2	5	2	1	4	2	1	2	2	2	3	4	1	1	2	4	1	4	3	1	3	1	2	5	1	0				3		4	2	3	4	3	3	3	3	4	3	4	1	2	2	5	4
464	A	10	1	3	2	1	4	2	2	3	2	2	2	5	3	3	5	5	3	5	1	3	4	1	2	3	1	1	1	0			3	3	1	3	4	4	4	4	4	4	3	4	4	4	4	4	4
465	A	10	2	4	2	1	3	2	1	3	5	2	5	3	1	1	2	3	1	5	2	3	3	2	3	3	3	0				3		4	2	3	2	2	3	2	3	3	5	5	5	5	5	5	3
466	A	10	1	4	2	1	4	1	1	3	5	1	3	5	2	3	5	5	2	2	2	3	3	1	4	3	3	1	1	0			3	4	3	3	4	3	4	4	4	4	4	3	3	3	3	3	3
467	A	10	2	1	2	1	3	3	1	3	5	1	4	4	3	3	5	4	3	5	2	1	3	1	3	3	2	1	1	0			1	6	5	6	2	1	2	2	3	3	4	3	4	3	3	3	4
468	A	10	1	3	2	1	3	1	1	2	5	1	1	3	1	1	4	3	1	5	2	3	1	3	3	3	2	0				3		6	3	5	3	4	4	4	4	3	4	4	4	4	4	4	4
469	A	10	1	2	2	2	3	2	1	2	5	1	3	5	1	3	5	5	1	5	3	2	3	2	2	3	3	1	0		1		3	4	3	3	4	4	4	3	4	3	4	4	3	3	3	3	4
470	A	10	2	4	2	1	4	1	1	3	5	2	4	5	3	3	5	5	3	2	2	1	2	1	1	0		1					5	3	2	3	3	2	4	5	4	4	3	4	3	4	3	3	4
471	A	10	2	3	2	1	3	1	1	2	5	1	1	4	1	3	3	4	1	3	2	3	1	2	3	3	3	1	1	0			3	4	3	3	4	4	4	3	4	4	4	3	2	3	3	3	3
472	A	10	1	3	2	1	2	1	2	3	5	3	4	4	2	2	5	4	2	5	2	3	3	1	3	3	1	1	1	1			3	4	2	3	3	4	3	4	3	4	4	2	3	3	4	3	5
473	A	10	2	5	2	1	3	2	2	1	5	2	3	4	3	3	4	4	3	5	1	2	3	2	2	3	3	0				3		4	7	3	5	4	5	5	5	5	4	3	4	4	4	4	3
474	A	10	2	4	2	1	3	1	1	2	5	2	4	4	1	1	2	4	1	4	1	3	3	1	3	3	1	0				3		4	4	3	4	3	4	4	4	4	4	4	4	3	4	4	3
475	A	10	1	2	1	1	2	4	1	3	5	2	2	5	3	3	5	5	3	2	2	1	1	2	1	0		1	1	1			1	6	8	7	4	4	3	3	4	4	3	3	3	3	3	3	3
476	B	10	1	3	2	2	5	1	1	2	2	1	5	4	1	1	4	4	1	4	1	3	3	1	3	3	1	1	1	0			3	4	3	1	5	4	4	5	4	4	3	3	3	3	4	4	3
477	B	10	2	3	2	1	3	2	2	1	5	1	1	4	1	1	4	4	1	5	2	1	1	2	1	3	1	0				3		3	2	3	4	4	2	3	3	4	4	3	2	3	4	4	5
478	B	10	2	3	1	1	5	3	1	4	4	2	2	4	3	3	5	4	3	4	3	2	2	3	2	5	3	1	1	1			2	6	2	3	4	4	4	4	4	4	4	4	4	3	5	4	4
479	B	10	1	3	2	1	3	2	1	1	3	2	5	5	2	2	4	5	2	2	2	1	1	2	3	3	1	1	1	1			3	2	1	3	1	1	3	1	2	3	4	4	4	3	4	4	3
480	B	10	2	3	2	1	3	2	1	2	2	2	4	4	3	3	3	4	3	4	2	3	3	2	2	5	2	0				3		6	3	3	3	4	3	2	3	3	3	3	3	3	3	3	3
481	B	10	1	2	2	1	3	2	1	2	4	1	1	3	2	2	2	3	2	4	2	1	1	2	2	3	2	0				6		6	6	5	2	2	2	3	3	2	4	4	4	3	4	3	4
482	B	10	2	3	2	1	3	2	1	2	4	3	3	4	2	3	3	4	2	5	1	2	2	1	3	3	1	0				3		4	3	3	4	3	4	3	3	4	4	4	4	4	5	4	5
483	B	10	1	3	2	1	3	1	2	1	3	2	4	5	1	1	5	5	1	5	1	3	3	1	2	5	1	1	1	0			5	4	2	3	4	3	4	3	4	4	4	3	2	2	3	2	3
484	B	10	2	2	2	1	3	2	2	1	4	1	1	5	3	3	5	5	3	2	1	2	2	1	2	3	1	1	1	0			3	1	1	3	4	4	4	3	4	3	3	2	3	3	3	3	5
485	B	10	2	4	2	1	3	2	1	3	5	1	1	5	1	1	5	5	1	5	2	3	3	2	3	6	2	1	1	1			2	6	4	3	3	3	2	3	3	2	5	4	4	4	5	4	3
486	B	10	1	3	2	2	5	1	2	1	3	1	4	4	2	3	5	4	2	5	1	2	2	1	2	5	2	1	1	1			5	4	4	5	4	4	2	3	3	4	5	4	3	3	4	4	4
487	B	10	1	1	2	1	4	1	1	2	4	2	2	5	3	3	5	5	3	5	4	2	1	2	3	4	3	1	1	0			4	4	3	6	4	2	4	3	4	3	3	2	2	3	4	2	5
488	B	10	2	4	2	1	4	3	1	3	3	2	4	4	1	1	3	4	1	2	2	3	3	2	2	3	3	0				4		6	4	3	4	2	3	3	4	3	4	4	4	4	4	4	3
489	B	10	2	3	2	1	3	1	1	4	3	1	3	4	1	3	4	4	1	5	4	2	1	2	2	3	2	0				3		6	4	3	4	3	4	4	4	3	4	5	4	3	2	4	4
490	B	10	1	3	2	1	3	2	2	1	4	1	1	4	3	3	5	4	3	5	1	2	2	1	3	3	1	1	1	0			5	4	8	5	5	5	5	5	5	5	4	3	3	3	4	3	3
491	B	10	2	4	2	1	3	2	1	3	3	1	4	5	1	3	5	5	1	4	2	3	3	1	4	3	1	1	1	1			3	4	3	3	3	3	3	3	3	3	3	3	2	4	3	4	3
492	B	10	2	4	2	1	4	2	2	1	2	1	3	5	2	2	5	5	2	2	1	2	2	1	3	3	1	1	1	0			4	4	4	3	5	5	5	4	3	4	4	4	4	4	4	3	3
493	B	10	1	3	2	1	3	2	2	1	3	2	2	5	1	3	5	5	1	5	2	3	3	2	3	3	3	1	1	0			3	4	4	3	3	4	3	2	4	4	3	3	2	3	4	4	3
494	B	10	2	5	2	1	2	2	2	1	4	2	4	4	3	3	2	4	3	5	1	2	2	1	2	3	1	0				2		4	3	3	3	3	4	4	3	4	4	3	3	4	4	4	4
495	B	10	1	4	2	2	4	2	2	4	5	2	3	5	1	1	5	5	1	5	1	2	2	4	2	3	1	1	1	0			2	2	1	3	4	2	3	3	4	4	4	4	3	4	4	4	5
496	B	10	2	4	2	1	4	2	1	2	5	2	2	4	1	3	2	4	1	5	1	3	3	2	3	0		0				3		4	2	3	2	3	2	3	3	2	4	4	4	4	4	3	4
497	B	10	1	3	2	1	3	2	1	4	3	1	4	4	3	3	5	4	3	2	1	4	2	4	4	3	1	1	1	1			3	4	1	3	2	2	2	3	3	2	3	3	2	3	3	3	5
498	B	10	2	4	2	1	4	2	1	4	3	1	3	5	2	3	5	5	2	5	2	3	2	1	3	0		1	1	1			5	6	6	3	3	3	3	3	3	3	4	2	3	3	4	3	3
499	B	10	1	5	2	1	5	2	1	2	4	2	2	5	3	3	5	5	3	5	1	3	3	2	3	7	3	1	1	0			4	4	3	3	3	2	3	3	2	3	4	3	4	4	4	4	5
500	B	10	2	2	2	1	3	2	1	3	5	1	4	5	2	3	5	5	2	5	1	3	2	1	2	3	5	1	1	1			3	4	3	3	4	3	3	4	3	3	4	4	4	3	4	4	3
501	A	11	2	1	2	1	4	2	1	2	4	2	2	5	2	2	5	5	2	5	3	1	3	2	2	3	1	1	1	0			3	4	2	3	2	2	3	3	3	2	3	4	5	4	4	5	3
502	A	11	1	3	2	2	3	2	1	2	3	3	1	5	1	3	5	5	1	2	2	3	2	1	3	7	3	1	0		1		2	4	4	5	3	4	4	3	4	4	4	3	4	3	4	3	5
503	A	11	2	4	2	1	3	2	1	3	3	2	4	5	3	3	5	5	3	4	1	2	2	1	2	3	1	1	1	0			3	4	1	3	4	3	3	3	3	3	4	3	3	3	3	3	4
504	A	11	1	4	2	1	4	2	1	2	3	2	2	5	1	3	5	5	1	3	2	1	3	1	2	5	1	1	1	1		3		4	1	3	4	4	4	4	4	3	3	3	4	4	4	3	4
505	A	11	2	4	2	1	3	2	1	4	4	2	2	5	2	2	2	5	2	4	1	3	4	1	3	6	3	1	1	0			3	4	5	3	2	2	2	2	3	2	4	4	4	4	4	4	4
506	A	11	2	4	2	1	2	2	1	2	4	2	4	5	3	3	3	5	3	2	2	3	1	2	2	3	2	1	1	0			3	4	3	3	3	4	3	2	3	3	3	3	3	3	3	3	5
507	A	11	2	4	2	1	3	2	1	2	5	1	1	4	1	1	5	4	1	5	1	3	3	2	3	3	1	1	1	1			5	3	1	3	3	3	3	3	3	3	4	3	4	3	4	4	5
508	A	11	1	1	2	2	4	2	2	4	3	1	3	5	1	3	5	5	1	5	1	3	1	2	2	5	1	1	1	1			5	4	7	3	4	4	4	3	4	4	4	4	4	4	4	4	4
509	A	11	1	2	2	1	5	2	2	1	5	1	4	5	3	3	5	5	3	4	1	3	2	1	2	7	1	1	1	0			1	4	1	5	3	3	3	2	3	2	4	3	3	3	3	3	4
510	A	11	1	2	1	1	5	2	1	2	4	1	1	5	1	1	5	5	1	2	1	3	3	1	3	3	2	1	0		1		2	7	6	7	4	4	4	4	4	4	4	4	3	3	3	4	3
511	A	11	1	2	1	1	3	1	2	3	3	2	3	4	2	3	5	4	2	4	2	3	2	1	4	5	2	1	1	1			1	4	6	7	4	4	4	4	4	4	4	3	3	3	4	4	3
512	A	11	1	2	2	1	3	2	1	2	2	3	4	5	3	3	5	5	3	4	2	3	3	2	3	3	1	1	1	1			3	4	2	1	4	3	4	4	4	4	4	3	3	4	4	3	3
513	A	11	1	3	2	2	4	2	2	1	4	1	1	4	1	3	5	4	1	3	1	3	2	1	3	3	1	1	1	1			3	4	3	1	4	3	3	2	4	4	4	4	4	4	4	3	3
514	A	11	2	3	2	1	5	2	1	4	4	2	4	5	3	3	5	5	3	5	2	3	2	4	3	5	2	1	1	1			4	4	3	3	4	3	4	3	4	3	3	2	2	2	2	3	4
515	A	11	2	3	2	1	4	1	1	2	3	1	1	4	1	3	4	4	1	5	1	3	3	2	3	3	1	1	1	0			3	3	7	3	2	2	2	3	4	3	3	4	2	3	3	3	3
516	A	11	1	5	2	1	3	1	2	1	4	1	1	4	1	1	5	4	1	4	2	3	2	4	3	3	3	1	1	1			3	4	3	3	3	3	3	4	3	3	5	5	5	4	5	4	5
517	A	11	2	2	2	1	3	2	2	1	5	2	4	5	3	3	5	5	3	5	2	3	2	1	3	3	1	1	0		1		3	3	2	3	3	3	4	3	3	4	4	3	3	3	3	3	5
518	A	11	1	3	2	1	3	1	4	3	3	1	1	4	2	3	4	4	2	2	2	3	3	2	3	0		1	0		1		2	4	3	5	3	3	4	3	4	3	4	4	3	4	4	3	4
519	A	11	1	3	1	2	4	2	2	3	4	1	4	4	3	3	4	4	3	5	2	1	2	1	1	4	7	0				4		6	8	5	4	4	3	4	4	4	3	4	3	3	4	5	4
520	A	11	2	3	2	2	4	2	1	3	3	2	2	5	2	3	5	5	2	4	1	2	3	2	2	4	4	1	1	1			4	6	4	3	5	5	5	4	4	4	4	4	4	4	4	4	3
521	A	11	1	2	2	1	5	1	2	1	3	1	1	4	2	2	5	4	2	5	2	3	2	1	3	0		1	1	1			3	4	4	5	3	4	4	5	4	4	3	3	3	3	2	4	4
522	A	11	2	2	2	1	3	2	1	4	4	3	3	5	1	3	5	5	1	2	2	3	2	1	3	6	5	1	0		1		2	4	8	3	4	3	4	3	3	3	5	4	4	5	4	5	4
523	A	11	2	4	2	1	5	3	1	3	3	2	2	5	2	2	5	5	2	5	2	1	1	2	1	1	1	1	1	1			3	4	3	3	3	4	3	3	3	3	3	3	3	3	3	3	4
524	A	11	1	5	1	2	5	1	2	1	2	1	1	5	3	3	5	5	3	5	3	2	2	3	2	1	9	1	1	1			2	6	4	9	2	3	2	2	2	2	4	4	5	3	3	4	4
525	A	11	2	2	2	1	5	3	1	2	4	2	2	5	2	2	5	5	2	5	2	1	1	2	1	1	10	1	0		1		4	2	2	3	3	3	3	4	3	3	4	4	4	5	5	4	5
526	B	11	1	4	2	1	5	3	1	3	4	2	2	4	2	3	4	4	3	4	2	3	3	2	3	3	10	0				3		2	4	3	5	5	5	4	4	5	5	5	4	4	5	4	4
527	B	11	2	4	2	1	5	3	1	3	3	3	4	5	2	2	5	5	2	5	2	1	1	2	1	1	1	1	0		1		3	2	4	3	2	3	4	4	3	3	5	4	4	5	5	4	5
528	B	11	2	5	2	1	5	1	3	1	4	2	3	5	2	2	5	5	2	5	1	2	2	1	2	2	3	1	1	0			2	4	5	3	4	4	4	3	3	3	4	5	4	4	5	4	5
529	B	11	2	3	1	1	5	4	2	1	5	1	1	5	3	3	5	5	3	5	1	3	3	1	3	1	3	1	1	1			2	5	6	4	4	4	4	4	4	4	2	3	3	3	3	3	4
530	B	11	1	3	2	1	5	1	2	3	3	2	2	5	2	2	5	5	3	5	1	2	2	1	2	2	1	1	0		1		2	4	8	1	3	2	4	3	3	4	5	4	4	5	5	5	3
531	B	11	2	4	2	1	5	3	1	2	4	2	2	5	2	3	5	5	2	2	2	3	3	2	3	1	1	1	1	1			1	3	1	3	3	2	3	3	3	3	4	5	3	3	4	4	4
532	B	11	1	4	2	2	5	1	2	1	3	2	3	5	2	2	5	5	2	5	1	2	2	1	2	2	1	1	0		1		2	4	8	1	3	3	4	3	3	3	3	3	3	3	3	3	3
533	B	11	1	4	2	1	5	1	2	1	3	3	2	5	2	2	5	5	3	4	4	2	2	4	2	2	1	1	1	0			2	4	4	1	3	4	4	4	4	4	4	4	4	4	4	4	3
534	B	11	2	4	2	1	5	1	3	2	4	2	2	5	2	3	5	5	2	5	2	3	3	2	3	0		1	1	1			3	3	2	3	3	3	3	3	3	4	3	3	3	4	4	4	3
535	B	11	1	4	2	1	5	1	3	1	3	2	4	5	2	2	5	5	3	5	4	2	2	4	2	3	1	1	0		1		3	4	3	3	4	3	4	3	4	4	4	5	5	4	4	4	4
536	B	11	2	4	2	3	5	4	1	3	2	2	3	5	2	2	5	5	2	5	1	2	2	1	2	1	1	1	1	1			3	4	3	3	3	3	3	3	3	3	5	3	3	4	4	5	3
537	B	11	2	3	2	2	5	1	3	1	3	2	2	5	2	3	5	5	2	5	2	3	3	2	3	1	1	1	1	0			4	3	3	3	4	4	3	3	3	1	3	3	3	3	3	3	4
538	B	11	1	4	2	1	4	1	2	1	4	2	2	3	2	2	3	3	3	3	1	2	2	1	2	0		0				3		4	1	8	4	4	4	4	4	4	3	3	3	3	4	3	3
539	B	11	2	3	2	3	5	1	2	1	5	2	2	5	2	3	4	5	2	5	2	3	3	2	3	1	2	1	1	1			1	4	5	3	4	3	3	3	4	3	4	5	5	4	5	4	5
540	B	11	2	3	2	2	5	3	1	3	5	2	2	5	2	2	3	5	2	5	1	2	2	1	2	0		0				1		3	4	3	3	3	3	3	3	3	4	4	5	4	3	5	5
541	B	11	1	3	1	3	5	3	4	1	3	1	3	5	1	1	5	5	3	5	1	2	2	1	2	1	6	0				3		6	3	7	3	4	3	3	3	4	3	3	4	4	4	3	5
542	B	11	1	4	2	3	5	3	4	1	3	1	1	5	3	3	5	5	3	5	1	3	3	1	3	1	1	1	0		1		1	4	1	4	2	2	3	2	2	2	3	3	3	3	3	3	5
543	B	11	2	1	2	1	5	1	3	1	4	3	1	5	1	1	5	5	1	5	1	4	4	1	4	2	1	1	1	1			2	2	2	4	4	4	4	4	4	4	3	3	3	3	3	3	3
544	B	11	2	3	2	2	5	1	2	1	5	1	1	5	3	3	5	5	3	5	2	3	3	2	3	1	7	1	1	0			1	1	8	3	4	3	5	3	4	4	4	4	4	4	4	4	4
545	B	11	2	1	2	1	5	1	2	1	4	3	3	5	3	3	5	5	3	5	1	3	3	1	3	0		1	1	1			3	4	1	3	3	3	3	2	3	2	3	3	3	3	3	3	3
546	B	11	1	4	2	1	5	4	3	1	3	1	4	5	1	3	5	5	1	5	1	3	3	1	3	0		1	0		1		3	4	3	2	3	3	5	4	4	4	3	4	4	4	4	4	3
547	B	11	2	2	2	1	5	1	2	1	3	1	1	5	1	1	5	5	3	5	3	1	1	3	1	0		1	1	1			5	4	2	3	3	3	3	3	3	3	3	3	3	3	3	3	4
548	B	11	2	2	1	3	4	1	2	1	3	2	3	4	3	3	4	4	3	4	2	3	3	2	3	0		0				4		6	2	5	2	4	2	3	4	4	3	3	4	4	3	3	4
549	B	11	2	2	2	2	4	2	3	1	4	2	2	5	2	2	5	5	2	5	1	2	2	1	2	0		1	1	1			2	2	8	3	3	4	3	3	4	3	4	4	5	3	3	4	4
550	B	11	1	3	2	1	5	3	2	1	4	1	1	5	1	1	5	5	1	5	2	1	1	2	1	2	1	1	1	1			2	3	3	3	3	4	4	4	3	4	3	3	3	3	3	3	4
551	A	12	2	3	2	3	5	2	1	1	5	3	1	5	1	3	5	5	3	2	1	3	3	1	3	0		1	1	1			3	4	4	5	4	4	4	4	4	4	4	4	4	4	4	4	4
552	A	12	2	5	2	2	5	1	2	1	3	1	3	5	3	3	3	5	3	5	2	3	3	2	3	1	9	0				2		2	1	6	2	2	2	3	3	3	3	2	3	3	3	3	3
553	A	12	1	2	2	2	5	4	1	2	2	1	1	5	1	3	5	5	1	5	1	3	3	1	3	0		1	0		1		2	4	8	5	5	3	5	4	5	5	4	4	5	5	4	4	3
554	A	12	2	1	2	2	5	2	3	1	2	1	1	5	3	3	5	5	3	5	1	3	3	1	3	1	1	1	1	0			1	4	1	3	4	3	3	2	2	2	3	3	3	3	3	3	4
555	A	12	2	1	2	3	5	2	3	1	5	1	3	5	3	3	5	5	3	5	1	3	3	1	3	0		1	1	1			3	4	1	5	2	2	2	2	2	2	4	4	4	3	3	5	4
556	A	12	1	4	2	2	5	4	1	2	5	2	2	2	3	3	4	2	3	2	1	3	3	1	3	0		0				3		5	3	4	4	2	3	3	3	3	3	3	4	5	5	4	4
557	A	12	2	4	1	2	5	1	2	1	5	2	4	5	3	3	5	5	3	5	2	3	3	2	3	0		1	1	1			1	4	4	4	3	3	3	2	2	3	3	4	4	4	5	4	3
558	A	12	2	4	1	1	5	1	2	2	5	2	2	4	3	3	5	4	3	4	2	3	3	2	2	1	3	0				3		6	4	4	4	3	3	3	3	3	2	2	3	3	4	4	4
559	A	12	1	4	2	2	5	2	1	2	5	1	3	5	1	3	5	5	1	5	1	3	3	1	2	0		1	1	0			3	4	2	4	1	2	2	3	2	2	4	5	3	3	4	5	3
560	A	12	1	2	2	1	5	2	3	1	5	1	1	5	3	3	5	5	3	5	2	3	3	2	3	0		1	1	1			3	4	4	4	3	2	3	3	5	2	4	5	5	4	4	4	4
561	A	12	2	4	2	1	5	1	2	1	5	1	1	5	1	3	5	5	1	5	1	3	3	1	2	0		1	1	1			3	4	3	3	4	4	3	4	3	3	4	4	5	5	4	4	4
562	A	12	1	4	2	1	5	4	1	2	5	3	1	4	3	3	4	4	3	4	2	3	3	2	2	0		0				3		6	2	3	3	3	3	3	3	3	4	5	5	4	4	5	3
563	A	12	1	2	1	1	5	1	2	1	5	2	3	5	2	3	5	5	2	5	2	3	3	2	3	0		1	1	1			0	4	6	5	5	4	5	4	5	5	5	4	4	4	5	4	4
564	A	12	2	1	2	1	5	2	1	3	5	1	1	5	3	3	5	5	3	5	2	3	3	2	2	1	1	1	1	1			4	4	2	3	3	3	3	3	3	3	4	5	5	4	4	5	3
565	A	12	2	1	2	1	5	3	1	2	5	1	4	5	1	1	5	5	1	5	2	1	1	2	3	0		1	1	1			3	4	6	3	1	1	1	2	2	3	5	3	3	4	4	4	5
566	A	12	1	1	2	1	5	1	3	1	2	3	3	4	2	2	5	4	2	2	1	2	2	1	2	0		0				3		4	2	3	3	3	3	3	3	3	4	4	5	5	4	5	4
567	A	12	2	3	2	2	5	1	3	2	1	2	2	4	3	3	5	4	3	4	2	3	3	2	2	0		0				3		4	4	3	5	5	4	4	4	4	4	4	5	5	4	5	5
568	A	12	1	3	2	1	4	1	3	2	3	2	2	5	3	3	5	5	3	2	2	3	3	2	3	0		1	1	0			2	3	4	3	5	4	4	2	4	3	4	4	3	3	4	4	5
569	A	12	2	5	2	1	4	2	3	1	3	2	2	5	2	3	5	5	2	5	2	3	1	2	4	0		1	1	1			1	6	5	2	3	3	3	3	3	3	4	4	5	4	4	4	4
570	A	12	1	3	2	1	4	3	2	1	4	2	3	5	3	3	5	5	3	5	1	3	3	2	3	0		1	1	1			3	2	1	3	4	3	4	4	4	4	3	3	4	4	4	4	5
571	A	12	1	3	2	3	5	3	1	2	5	3	2	4	2	2	5	4	3	4	2	2	1	2	3	1	1	0				3		4	1	3	5	3	3	3	3	4	4	4	4	4	5	4	3
572	A	12	2	3	2	2	5	1	2	1	4	2	2	4	3	3	4	4	3	4	3	3	2	1	3	1	7	0				4		4	2	3	3	3	3	3	3	2	4	4	3	4	4	4	5
573	A	12	2	1	2	1	4	1	3	1	3	1	3	5	1	3	5	5	1	2	1	3	3	1	3	0		1	0		1		2	4	3	3	3	3	2	2	2	2	4	4	4	3	3	4	4
574	A	12	1	2	2	3	5	4	1	3	3	2	4	5	2	2	5	5	2	5	1	2	2	1	2	1	1	1	1	1			3	4	4	3	3	3	4	3	3	4	5	4	4	4	5	4	3
575	A	12	2	3	2	2	5	3	2	1	2	4	2	4	2	3	5	4	3	4	2	3	3	2	3	1	1	0				3		6	2	3	4	3	3	3	3	3	4	5	5	5	4	4	4
576	B	12	1	3	2	3	5	3	4	1	3	2	2	5	3	3	5	5	3	5	1	3	2	1	3	1	1	1	1	1			2	6	2	9	5	5	5	4	5	5	5	5	5	5	5	5	4
577	B	12	1	3	2	3	5	2	3	1	4	2	3	3	2	2	4	3	2	3	1	2	2	4	2	0		0				3		6	2	5	4	4	4	4	4	3	4	4	3	3	4	4	4
578	B	12	2	4	2	1	5	2	1	2	2	4	2	5	3	3	5	5	3	5	2	3	3	2	3	1	1	1	1	1			1	4	1	5	4	3	5	4	4	4	5	5	5	5	5	5	5
579	B	12	2	3	2	2	4	4	1	2	5	1	1	4	1	1	5	4	1	2	3	1	2	4	1	0		1	0		1		3	4	1	3	2	2	3	3	3	3	4	4	4	4	4	4	3
580	B	12	1	4	2	1	5	2	3	1	3	1	3	3	1	3	3	3	1	3	1	3	2	1	3	1	2	0				2		4	4	5	5	3	3	4	4	3	5	5	5	5	5	5	5
581	B	12	2	2	2	1	5	2	3	1	3	3	4	5	3	3	5	5	3	5	2	3	3	2	3	1	1	1	0		1		2	4	1	5	2	3	3	2	3	3	2	2	2	2	2	2	3
582	B	12	1	3	1	1	4	2	3	1	4	2	2	5	2	3	5	5	2	5	2	3	2	1	3	0		1	1	1			0	4	6	5	3	3	3	3	2	3	5	5	5	5	5	5	3
583	B	12	2	2	2	3	5	3	1	3	3	1	3	5	1	1	5	5	1	5	2	1	3	2	2	1	1	1	1	0			3	6	2	3	3	2	3	3	3	2	3	3	3	3	4	4	4
584	B	12	2	4	2	2	5	3	1	3	4	3	2	4	3	3	4	4	3	4	2	3	2	1	2	1	1	0				3		4	2	3	3	2	3	3	3	3	5	5	5	5	5	5	4
585	B	12	1	4	2	1	5	1	2	1	3	2	2	5	2	2	5	5	2	2	3	2	2	1	3	1	1	1	1	0			1	4	1	3	4	2	3	3	5	4	5	5	5	5	5	5	4
586	B	12	2	4	2	3	5	1	2	1	5	4	3	5	1	1	5	5	1	5	2	1	3	1	2	0	1	1	0		1		2	4	4	3	5	2	4	5	5	5	5	5	5	5	3	5	4
587	B	12	1	5	2	2	5	3	2	4	5	2	2	4	2	3	5	4	2	4	2	3	4	1	2	0	2	0				3		3	2	3	4	5	5	4	5	5	4	4	3	4	4	4	4
588	B	12	1	5	2	2	5	1	2	1	5	4	4	5	3	3	5	5	3	5	2	3	3	2	3	1	1	1	1	1			2	4	1	5	2	1	5	3	4	4	4	4	4	4	4	4	4
589	B	12	2	4	2	1	5	3	1	3	3	2	2	5	2	2	5	5	2	5	2	1	1	2	1	1	1	1	1	1			3	4	3	3	3	4	3	3	3	3	3	3	3	3	3	3	4
590	B	12	1	5	1	2	5	1	2	1	2	1	1	5	3	3	5	5	3	5	3	2	2	3	2	1	9	1	1	1			2	6	4	9	2	3	2	2	2	2	4	4	5	3	3	4	4
591	B	12	2	2	2	1	5	3	1	2	4	2	2	5	2	2	5	5	2	5	2	1	1	2	1	1	10	1	0		1		4	2	2	3	3	3	3	4	3	3	4	4	4	5	5	4	5
592	B	12	1	4	2	1	5	3	1	3	4	2	2	4	2	3	4	4	3	4	2	3	3	2	3	3	10	0				3		2	4	3	5	5	5	4	4	5	5	5	4	4	5	4	4
593	B	12	2	4	2	1	5	3	1	3	3	3	4	5	2	2	5	5	2	5	2	1	1	2	1	1	1	1	0		1		3	2	4	3	2	3	4	4	3	3	5	4	4	5	5	4	5
594	B	12	2	5	2	1	5	1	3	1	4	2	3	5	2	2	5	5	2	5	1	2	2	1	2	2	3	1	1	0			2	4	5	3	4	4	4	3	3	3	4	5	4	4	5	4	5
595	B	12	2	3	1	1	5	4	2	1	5	1	1	5	3	3	5	5	3	5	1	3	3	1	3	1	3	1	1	1			2	5	6	4	4	4	4	4	4	4	2	3	3	3	3	3	4
596	B	12	1	3	2	1	5	1	2	3	3	2	2	5	2	2	5	5	3	5	1	2	2	1	2	2	1	1	0		1		2	4	8	1	3	2	4	3	3	4	5	4	4	5	5	5	3
597	B	12	2	4	2	1	5	3	1	2	4	2	2	5	2	3	5	5	2	2	2	3	3	2	3	1	1	1	1	1			1	3	1	3	3	2	3	3	3	3	4	5	3	3	4	4	4
598	B	12	1	4	2	2	5	1	2	1	3	2	3	5	2	2	5	5	2	5	1	2	2	1	2	2	1	1	0		1		2	4	8	1	3	3	4	3	3	3	3	3	3	3	3	3	3
599	B	12	1	4	2	1	5	1	2	1	3	3	2	5	2	2	5	5	3	4	4	2	2	4	2	2	1	1	1	0			2	4	4	1	3	4	4	4	4	4	4	4	4	4	4	4	3
600	B	12	2	4	2	1	5	1	3	2	4	2	2	5	2	3	5	5	2	5	2	3	3	2	3	0		1	1	1			3	3	2	3	3	3	3	3	3	4	3	3	3	4	4	4	3
601	A	13	2	4	2	1	5	1	3	1	3	2	4	5	2	2	5	5	3	5	4	2	2	4	2	3	1	1	0		1		3	4	3	3	4	3	4	3	4	4	4	5	5	4	4	4	4
602	A	13	1	4	2	3	5	4	1	3	2	2	3	5	2	2	5	5	2	5	1	2	2	1	2	1	1	1	1	1			3	4	3	3	3	3	3	3	3	3	5	3	3	4	4	5	3
603	A	13	2	3	2	2	5	1	3	1	3	2	2	5	2	3	5	5	2	5	2	3	3	2	3	1	1	1	1	0			4	3	3	3	4	4	3	3	3	1	3	3	3	3	3	3	4
604	A	13	1	4	2	1	4	1	2	1	4	2	2	3	2	2	3	3	3	3	1	2	2	1	2	0		0				3		4	1	8	4	4	4	4	4	4	3	3	3	3	4	3	3
605	A	13	2	3	2	3	5	1	2	1	5	2	2	5	2	3	4	5	2	5	2	3	3	2	3	1	2	1	1	1			1	4	5	3	4	3	3	3	4	3	4	5	5	4	5	4	5
606	A	13	2	3	2	2	5	3	1	3	5	2	2	5	2	2	3	5	2	5	1	2	2	1	2	0		0				1		3	4	3	3	3	3	3	3	3	4	4	5	4	3	5	5
607	A	13	1	3	1	3	5	3	4	1	3	1	3	5	1	1	5	5	3	5	1	2	2	1	2	1	6	0				3		6	3	7	3	4	3	3	3	4	3	3	4	4	4	3	5
608	A	13	1	4	2	3	5	3	4	1	3	1	1	5	3	3	5	5	3	5	1	3	3	1	3	1	1	1	0		1		1	4	1	4	2	2	3	2	2	2	3	3	3	3	3	3	5
609	A	13	2	1	2	1	5	1	3	1	4	3	1	5	1	1	5	5	1	5	1	4	4	1	4	2	1	1	1	1			2	2	2	4	4	4	4	4	4	4	3	3	3	3	3	3	3
610	A	13	2	3	2	2	5	1	2	1	5	1	1	5	3	3	5	5	3	5	2	3	3	2	3	1	7	1	1	0			1	1	8	3	4	3	5	3	4	4	4	4	4	4	4	4	4
611	A	13	2	1	2	1	5	1	2	1	4	3	3	5	3	3	5	5	3	5	1	3	3	1	3	0		1	1	1			3	4	1	3	3	3	3	2	3	2	3	3	3	3	3	3	3
612	A	13	1	4	2	1	5	4	3	1	3	1	4	5	1	3	5	5	1	5	1	3	3	1	3	0		1	0		1		3	4	3	2	3	3	5	4	4	4	3	4	4	4	4	4	3
613	A	13	2	2	2	1	5	1	2	1	3	1	1	5	1	1	5	5	3	5	3	1	1	3	1	0		1	1	1			5	4	2	3	3	3	3	3	3	3	3	3	3	3	3	3	4
614	A	13	1	2	1	3	4	1	2	1	3	2	3	4	3	3	4	4	3	4	2	3	3	2	3	0		0				4		6	2	5	2	4	2	3	4	4	3	3	4	4	3	3	4
615	A	13	2	2	2	2	4	2	3	1	4	2	2	5	2	2	5	5	2	5	1	2	2	1	2	0		1	1	1			2	2	8	3	3	4	3	3	4	3	4	4	5	3	3	4	4
616	A	13	2	3	2	1	5	3	2	1	4	1	1	5	1	1	5	5	1	5	2	1	1	2	1	2	1	1	1	1			2	3	3	3	3	4	4	4	3	4	3	3	3	3	3	3	4
617	A	13	1	3	2	3	5	2	1	1	5	3	1	5	1	3	5	5	3	2	1	3	3	1	3	0		1	1	1			3	4	4	5	4	4	4	4	4	4	4	4	4	4	4	4	4
618	A	13	1	5	2	2	5	1	2	1	3	1	3	5	3	3	3	5	3	5	2	3	3	2	3	1	9	0				2		2	1	6	2	2	2	3	3	3	3	2	3	3	3	3	3
619	A	13	2	2	2	2	5	4	1	2	2	1	1	5	1	3	5	5	1	5	1	3	3	1	3	0		1	0		1		2	4	8	5	5	3	5	4	5	5	4	4	5	5	4	4	3
620	A	13	1	1	2	2	5	2	3	1	2	1	1	5	3	3	5	5	3	5	1	3	3	1	3	1	1	1	1	0			1	4	1	3	4	3	3	2	2	2	3	3	3	3	3	3	4
621	A	13	2	1	2	3	5	2	3	1	5	1	3	5	3	3	5	5	3	5	1	3	3	1	3	0		1	1	1			3	4	1	5	2	2	2	2	2	2	4	4	4	3	3	5	4
622	A	13	1	4	2	2	5	4	1	2	5	2	2	2	3	3	4	2	3	2	1	3	3	1	3	0		0				3		5	3	4	4	2	3	3	3	3	3	3	4	5	5	4	4
623	A	13	2	4	1	2	5	1	2	1	5	2	4	5	3	3	5	5	3	5	2	3	3	2	3	0		1	1	1			1	4	4	4	3	3	3	2	2	3	3	4	4	4	5	4	3
624	A	13	1	4	1	1	5	1	2	2	5	2	2	4	3	3	5	4	3	4	2	3	3	2	2	1	3	0				3		6	4	4	4	3	3	3	3	3	2	2	3	3	4	4	4
625	A	13	1	4	2	2	5	2	1	2	5	1	3	5	1	3	5	5	1	5	1	3	3	1	2	0		1	1	0			3	4	2	4	1	2	2	3	2	2	4	5	3	3	4	5	3
626	B	13	2	2	2	1	5	2	3	1	5	1	1	5	3	3	5	5	3	5	2	3	3	2	3	0		1	1	1			3	4	4	4	3	2	3	3	5	2	4	5	5	4	4	4	4
627	B	13	1	4	2	1	5	1	2	1	5	1	1	5	1	3	5	5	1	5	1	3	3	1	2	0		1	1	1			3	4	3	3	4	4	3	4	3	3	4	4	5	5	4	4	4
628	B	13	2	4	2	1	5	4	1	2	5	3	1	4	3	3	4	4	3	4	2	3	3	2	2	0		0				3		6	2	3	3	3	3	3	3	3	4	5	5	4	4	5	3
629	B	13	1	2	1	1	5	1	2	1	5	2	3	5	2	3	5	5	2	5	2	3	3	2	3	0		1	1	1			0	4	6	5	5	4	5	4	5	5	5	4	4	4	5	4	4
630	B	13	2	1	2	1	5	2	1	3	5	1	1	5	3	3	5	5	3	5	2	3	3	2	2	1	1	1	1	1			4	4	2	3	3	3	3	3	3	3	4	5	5	4	4	5	3
631	B	13	1	1	2	1	5	3	1	2	5	1	4	5	1	1	5	5	1	5	2	1	1	2	3	0		1	1	1			3	4	6	3	1	1	1	2	2	3	5	3	3	4	4	4	5
632	B	13	2	1	2	1	5	1	3	1	2	3	3	4	2	2	5	4	2	2	1	2	2	1	2	0		0				3		4	2	3	3	3	3	3	3	3	4	4	5	5	4	5	4
633	B	13	1	3	2	2	5	1	3	2	1	2	2	4	3	3	5	4	3	4	2	3	3	2	2	0		0				3		4	4	3	5	5	4	4	4	4	4	4	5	5	4	5	5
634	B	13	2	3	2	1	4	1	3	2	3	2	2	5	3	3	5	5	3	2	2	3	3	2	3	0		1	1	0			2	3	4	3	5	4	4	2	4	3	4	4	3	3	4	4	5
635	B	13	1	5	2	1	4	2	3	1	3	2	2	5	2	3	5	5	2	5	2	3	1	2	4	0		1	1	1			1	6	5	2	3	3	3	3	3	3	4	4	5	4	4	4	4
636	B	13	1	3	2	1	4	3	2	1	4	2	3	5	3	3	5	5	3	5	1	3	3	2	3	0		1	1	1			3	2	1	3	4	3	4	4	4	4	3	3	4	4	4	4	5
637	B	13	1	3	2	3	5	3	1	2	5	3	2	4	2	2	5	4	3	4	2	2	1	2	3	1	1	0				3		4	1	3	5	3	3	3	3	4	4	4	4	4	5	4	3
638	B	13	1	3	2	2	5	1	2	1	4	2	2	4	3	3	4	4	3	4	3	3	2	1	3	1	7	0				4		4	2	3	3	3	3	3	3	2	4	4	3	4	4	4	5
639	B	13	2	1	2	1	4	1	3	1	3	1	3	5	1	3	5	5	1	2	1	3	3	1	3	0		1	0		1		2	4	3	3	3	3	2	2	2	2	4	4	4	3	3	4	4
640	B	13	1	2	2	3	5	4	1	3	3	2	4	5	2	2	5	5	2	5	1	2	2	1	2	1	1	1	1	1			3	4	4	3	3	3	4	3	3	4	5	4	4	4	5	4	3
641	B	13	2	3	2	2	5	3	2	1	2	4	2	4	2	3	5	4	3	4	2	3	3	2	3	1	1	0				3		6	2	3	4	3	3	3	3	3	4	5	5	5	4	4	4
642	B	13	1	3	2	3	5	3	4	1	3	2	2	5	3	3	5	5	3	5	1	3	2	1	3	1	1	1	1	1			2	6	2	9	5	5	5	4	5	5	5	5	5	5	5	5	4
643	B	13	1	3	2	3	5	2	3	1	4	2	3	3	2	2	4	3	2	3	1	2	2	4	2	0		0				3		6	2	5	4	4	4	4	4	3	4	4	3	3	4	4	4
644	B	13	2	4	2	1	5	2	1	2	2	4	2	5	3	3	5	5	3	5	2	3	3	2	3	1	1	1	1	1			1	4	1	5	4	3	5	4	4	4	5	5	5	5	5	5	5
645	B	13	1	3	2	2	4	4	1	2	5	1	1	4	1	1	5	4	1	2	3	1	2	4	1	0		1	0		1		3	4	1	3	2	2	3	3	3	3	4	4	4	4	4	4	3
646	B	13	2	4	2	1	5	2	3	1	3	1	3	3	1	3	3	3	1	3	1	3	2	1	3	1	2	0				2		4	4	5	5	3	3	4	4	3	5	5	5	5	5	5	5
647	B	13	1	2	2	1	5	2	3	1	3	3	4	5	3	3	5	5	3	5	2	3	3	2	3	1	1	1	0		1		2	4	1	5	2	3	3	2	3	3	2	2	2	2	2	2	3
648	B	13	1	3	1	1	4	2	3	1	4	2	2	5	2	3	5	5	2	5	2	3	2	1	3	0		1	1	1			0	4	6	5	3	3	3	3	2	3	5	5	5	5	5	5	3
649	B	13	1	2	2	3	5	3	1	3	3	1	3	5	1	1	5	5	1	5	2	1	3	2	2	1	1	1	1	0			3	6	2	3	3	2	3	3	3	2	3	3	3	3	4	4	4
650	B	13	2	4	2	2	5	3	1	3	4	3	2	4	3	3	4	4	3	4	2	3	2	1	2	1	1	0				3		4	2	3	3	2	3	3	3	3	5	5	5	5	5	5	4
651	A	14	1	4	2	1	5	1	2	1	3	2	2	5	2	2	5	5	2	2	3	2	2	1	3	1	1	1	1	0			1	4	1	3	4	2	3	3	5	4	5	5	5	5	5	5	4
652	A	14	2	4	2	3	5	1	2	1	5	4	3	5	1	1	5	5	1	5	2	1	3	1	2	0	1	1	0		1		2	4	4	3	5	2	4	5	5	5	5	5	5	5	3	5	4
653	A	14	2	5	2	2	5	3	2	4	5	2	2	4	2	3	5	4	2	4	2	3	4	1	2	0	2	0				3		3	2	3	4	5	5	4	5	5	4	4	3	4	4	4	4
654	A	14	1	5	2	2	5	1	2	1	5	4	4	5	3	3	5	5	3	5	2	3	3	2	3	1	1	1	1	1			2	4	1	5	2	1	5	3	4	4	4	4	4	4	4	4	4
655	A	14	2	4	2	2	5	2	1	2	5	2	3	5	2	2	5	5	2	5	1	2	3	1	2	1	9	0				3		8	5	2	3	3	2	3	4	4	4	4	4	4	4	4	4
656	A	14	2	4	2	3	5	2	3	1	5	3	1	3	3	3	4	3	3	3	1	3	3	1	3	1	1	0				3		4	8	3	4	4	4	5	5	5	5	5	5	5	5	5	3
657	A	14	1	2	2	3	4	1	2	2	5	1	1	5	1	1	5	5	1	5	2	1	1	3	2	0		1	1	0			1	7	3	2	3	2	2	4	2	3	4	4	3	3	4	4	4
658	A	14	1	3	1	3	5	1	3	3	5	1	3	5	1	3	5	5	1	2	1	3	3	2	2	2	3	1	1	1			2	5	1	4	5	4	4	4	4	4	2	3	4	3	3	2	4
659	A	14	2	4	2	1	5	1	3	1	3	2	4	5	2	2	5	5	3	5	4	2	2	4	2	3	1	1	0		1		3	4	3	3	4	3	4	3	4	4	4	5	5	4	4	4	4
660	A	14	2	4	2	3	5	4	1	3	2	2	3	5	2	2	5	5	2	5	1	2	2	1	2	1	1	1	1	1			3	4	3	3	3	3	3	3	3	3	5	3	3	4	4	5	3
661	A	14	2	3	2	2	5	1	3	1	3	2	2	5	2	3	5	5	2	5	2	3	3	2	3	1	1	1	1	0			4	3	3	3	4	4	3	3	3	1	3	3	3	3	3	3	4
662	A	14	1	4	2	1	4	1	2	1	4	2	2	3	2	2	3	3	3	3	1	2	2	1	2	0		0				3		4	1	8	4	4	4	4	4	4	3	3	3	3	4	3	3
663	A	14	2	3	2	3	5	1	2	1	5	2	2	5	2	3	4	5	2	5	2	3	3	2	3	1	2	1	1	1			1	4	5	3	4	3	3	3	4	3	4	5	5	4	5	4	5
664	A	14	2	3	2	2	5	3	1	3	5	2	2	5	2	2	3	5	2	5	1	2	2	1	2	0		0				1		3	4	3	3	3	3	3	3	3	4	4	5	4	3	5	5
665	A	14	1	3	1	3	5	3	4	1	3	1	3	5	1	1	5	5	3	5	1	2	2	1	2	1	6	0				3		6	3	7	3	4	3	3	3	4	3	3	4	4	4	3	5
666	A	14	1	4	2	3	5	3	4	1	3	1	1	5	3	3	5	5	3	5	1	3	3	1	3	1	1	1	0		1		1	4	1	4	2	2	3	2	2	2	3	3	3	3	3	3	5
667	A	14	2	1	2	1	5	1	3	1	4	3	1	5	1	1	5	5	1	5	1	4	4	1	4	2	1	1	1	1			2	2	2	4	4	4	4	4	4	4	3	3	3	3	3	3	3
668	A	14	2	3	2	2	5	1	2	1	5	1	1	5	3	3	5	5	3	5	2	3	3	2	3	1	7	1	1	0			1	1	8	3	4	3	5	3	4	4	4	4	4	4	4	4	4
669	A	14	2	1	2	1	5	1	2	1	4	3	3	5	3	3	5	5	3	5	1	3	3	1	3	0		1	1	1			3	4	1	3	3	3	3	2	3	2	3	3	3	3	3	3	3
670	A	14	1	4	2	1	5	4	3	1	3	1	4	5	1	3	5	5	1	5	1	3	3	1	3	0		1	0		1		3	4	3	2	3	3	5	4	4	4	3	4	4	4	4	4	3
671	A	14	2	2	2	1	5	1	2	1	3	1	1	5	1	1	5	5	3	5	3	1	1	3	1	0		1	1	1			5	4	2	3	3	3	3	3	3	3	3	3	3	3	3	3	4
672	A	14	1	2	1	3	4	1	2	1	3	2	3	4	3	3	4	4	3	4	2	3	3	2	3	0		0				4		6	2	5	2	4	2	3	4	4	3	3	4	4	3	3	4
673	A	14	2	2	2	2	4	2	3	1	4	2	2	5	2	2	5	5	2	5	1	2	2	1	2	0		1	1	1			2	2	8	3	3	4	3	3	4	3	4	4	5	3	3	4	4
674	A	14	2	3	2	1	5	3	2	1	4	1	1	5	1	1	5	5	1	5	2	1	1	2	1	2	1	1	1	1			2	3	3	3	3	4	4	4	3	4	3	3	3	3	3	3	4
675	A	14	1	3	2	3	5	2	1	1	5	3	1	5	1	3	5	5	3	2	1	3	3	1	3	0		1	1	1			3	4	4	5	4	4	4	4	4	4	4	4	4	4	4	4	4
676	B	14	2	5	2	2	5	1	2	1	3	1	3	5	3	3	3	5	3	5	2	3	3	2	3	1	9	0				2		2	1	6	2	2	2	3	3	3	3	2	3	3	3	3	3
677	B	14	1	2	2	2	5	4	1	2	2	1	1	5	1	3	5	5	1	5	1	3	3	1	3	0		1	0		1		2	4	8	5	5	3	5	4	5	5	4	4	5	5	4	4	3
678	B	14	2	1	2	2	5	2	3	1	2	1	1	5	3	3	5	5	3	5	1	3	3	1	3	1	1	1	1	0			1	4	1	3	4	3	3	2	2	2	3	3	3	3	3	3	4
679	B	14	1	1	2	3	5	2	3	1	5	1	3	5	3	3	5	5	3	5	1	3	3	1	3	0		1	1	1			3	4	1	5	2	2	2	2	2	2	4	4	4	3	3	5	4
680	B	14	1	4	2	2	5	4	1	2	5	2	2	2	3	3	4	2	3	2	1	3	3	1	3	0		0				3		5	3	4	4	2	3	3	3	3	3	3	4	5	5	4	4
681	B	14	2	4	1	2	5	1	2	1	5	2	4	5	3	3	5	5	3	5	2	3	3	2	3	0		1	1	1			1	4	4	4	3	3	3	2	2	3	3	4	4	4	5	4	3
682	B	14	1	4	1	1	5	1	2	2	5	2	2	4	3	3	5	4	3	4	2	3	3	2	2	1	3	0				3		6	4	4	4	3	3	3	3	3	2	2	3	3	4	4	4
683	B	14	2	4	2	2	5	2	1	2	5	1	3	5	1	3	5	5	1	5	1	3	3	1	2	0		1	1	0			3	4	2	4	1	2	2	3	2	2	4	5	3	3	4	5	3
684	B	14	2	2	2	1	5	2	3	1	5	1	1	5	3	3	5	5	3	5	2	3	3	2	3	0		1	1	1			3	4	4	4	3	2	3	3	5	2	4	5	5	4	4	4	4
685	B	14	2	4	2	1	5	1	2	1	5	1	1	5	1	3	5	5	1	5	1	3	3	1	2	0		1	1	1			3	4	3	3	4	4	3	4	3	3	4	4	5	5	4	4	4
686	B	14	1	4	2	1	5	4	1	2	5	3	1	4	3	3	4	4	3	4	2	3	3	2	2	0		0				3		6	2	3	3	3	3	3	3	3	4	5	5	4	4	5	3
687	B	14	1	2	1	1	5	1	2	1	5	2	3	5	2	3	5	5	2	5	2	3	3	2	3	0		1	1	1			0	4	6	5	5	4	5	4	5	5	5	4	4	4	5	4	4
688	B	14	2	1	2	1	5	2	1	3	5	1	1	5	3	3	5	5	3	5	2	3	3	2	2	1	1	1	1	1			4	4	2	3	3	3	3	3	3	3	4	5	5	4	4	5	3
689	B	14	1	1	2	1	5	3	1	2	5	1	4	5	1	1	5	5	1	5	2	1	1	2	3	0		1	1	1			3	4	6	3	1	1	1	2	2	3	5	3	3	4	4	4	5
690	B	14	2	1	2	1	5	1	3	1	2	3	3	4	2	2	5	4	2	2	1	2	2	1	2	0		0				3		4	2	3	3	3	3	3	3	3	4	4	5	5	4	5	4
691	B	14	2	3	2	2	5	1	3	2	1	2	2	4	3	3	5	4	3	4	2	3	3	2	2	0		0				3		4	4	3	5	5	4	4	4	4	4	4	5	5	4	5	5
692	B	14	2	3	2	1	4	1	3	2	3	2	2	5	3	3	5	5	3	2	2	3	3	2	3	0		1	1	0			2	3	4	3	5	4	4	2	4	3	4	4	3	3	4	4	5
693	B	14	1	5	2	1	4	2	3	1	3	2	2	5	2	3	5	5	2	5	2	3	1	2	4	0		1	1	1			1	6	5	2	3	3	3	3	3	3	4	4	5	4	4	4	4
694	B	14	2	3	2	1	4	3	2	1	4	2	3	5	3	3	5	5	3	5	1	3	3	2	3	0		1	1	1			3	2	1	3	4	3	4	4	4	4	3	3	4	4	4	4	5
695	B	14	1	3	2	3	5	3	1	2	5	3	2	4	2	2	5	4	3	4	2	2	1	2	3	1	1	0				3		4	1	3	5	3	3	3	3	4	4	4	4	4	5	4	3
696	B	14	2	3	2	2	5	1	2	1	4	2	2	4	3	3	4	4	3	4	3	3	2	1	3	1	7	0				4		4	2	3	3	3	3	3	3	2	4	4	3	4	4	4	5
697	B	14	2	1	2	1	4	1	3	1	3	1	3	5	1	3	5	5	1	2	1	3	3	1	3	0		1	0		1		2	4	3	3	3	3	2	2	2	2	4	4	4	3	3	4	4
698	B	14	1	2	2	3	5	4	1	3	3	2	4	5	2	2	5	5	2	5	1	2	2	1	2	1	1	1	1	1			3	4	4	3	3	3	4	3	3	4	5	4	4	4	5	4	3
699	B	14	2	3	2	2	5	3	2	1	2	4	2	4	2	3	5	4	3	4	2	3	3	2	3	1	1	0				3		6	2	3	4	3	3	3	3	3	4	5	5	5	4	4	4
700	B	14	1	3	2	3	5	3	4	1	3	2	2	5	3	3	5	5	3	5	1	3	2	1	3	1	1	1	1	1			2	6	2	9	5	5	5	4	5	5	5	5	5	5	5	5	4
701	A	15	1	3	2	3	5	2	3	1	4	2	3	3	2	2	4	3	2	3	1	2	2	4	2	0		0				3		6	2	5	4	4	4	4	4	3	4	4	3	3	4	4	4
702	A	15	2	4	2	1	5	2	1	2	2	4	2	5	3	3	5	5	3	5	2	3	3	2	3	1	1	1	1	1			1	4	1	5	4	3	5	4	4	4	5	5	5	5	5	5	5
703	A	15	2	3	2	2	4	4	1	2	5	1	1	4	1	1	5	4	1	2	3	1	2	4	1	0		1	0		1		3	4	1	3	2	2	3	3	3	3	4	4	4	4	4	4	3
704	A	15	2	4	2	1	5	2	3	1	3	1	3	3	1	3	3	3	1	3	1	3	2	1	3	1	2	0				2		4	4	5	5	3	3	4	4	3	5	5	5	5	5	5	5
705	A	15	2	2	2	1	5	2	3	1	3	3	4	5	3	3	5	5	3	5	2	3	3	2	3	1	1	1	0		1		2	4	1	5	2	3	3	2	3	3	2	2	2	2	2	2	3
706	A	15	2	3	1	1	4	2	3	1	4	2	2	5	2	3	5	5	2	5	2	3	2	1	3	0		1	1	1			0	4	6	5	3	3	3	3	2	3	5	5	5	5	5	5	3
707	A	15	2	2	2	3	5	3	1	3	3	1	3	5	1	1	5	5	1	5	2	1	3	2	2	1	1	1	1	0			3	6	2	3	3	2	3	3	3	2	3	3	3	3	4	4	4
708	A	15	2	4	2	2	5	3	1	3	4	3	2	4	3	3	4	4	3	4	2	3	2	1	2	1	1	0				3		4	2	3	3	2	3	3	3	3	5	5	5	5	5	5	4
709	A	15	2	4	2	1	5	1	2	1	3	2	2	5	2	2	5	5	2	2	3	2	2	1	3	1	1	1	1	0			1	4	1	3	4	2	3	3	5	4	5	5	5	5	5	5	4
710	A	15	2	4	2	3	5	1	2	1	5	4	3	5	1	1	5	5	1	5	2	1	3	1	2	0	1	1	0		1		2	4	4	3	5	2	4	5	5	5	5	5	5	5	3	5	4
711	A	15	2	5	2	2	5	3	2	4	5	2	2	4	2	3	5	4	2	4	2	3	4	1	2	0	2	0				3		3	2	3	4	5	5	4	5	5	4	4	3	4	4	4	4
712	A	15	1	5	2	2	5	1	2	1	5	4	4	5	3	3	5	5	3	5	2	3	3	2	3	1	1	1	1	1			2	4	1	5	2	1	5	3	4	4	4	4	4	4	4	4	4
713	A	15	2	4	2	1	5	3	1	3	3	2	2	5	2	2	5	5	2	5	2	1	1	2	1	1	1	1	1	1			3	4	3	3	3	4	3	3	3	3	3	3	3	3	3	3	4
714	A	15	2	5	1	2	5	1	2	1	2	1	1	5	3	3	5	5	3	5	3	2	2	3	2	1	9	1	1	1			2	6	4	9	2	3	2	2	2	2	4	4	5	3	3	4	4
715	A	15	2	2	2	1	5	3	1	2	4	2	2	5	2	2	5	5	2	5	2	1	1	2	1	1	10	1	0		1		4	2	2	3	3	3	3	4	3	3	4	4	4	5	5	4	5
716	A	15	2	4	2	1	5	3	1	3	4	2	2	4	2	3	4	4	3	4	2	3	3	2	3	3	10	0				3		2	4	3	5	5	5	4	4	5	5	5	4	4	5	4	4
717	A	15	2	4	2	1	5	3	1	3	3	3	4	5	2	2	5	5	2	5	2	1	1	2	1	1	1	1	0		1		3	2	4	3	2	3	4	4	3	3	5	4	4	5	5	4	5
718	A	15	2	5	2	1	5	1	3	1	4	2	3	5	2	2	5	5	2	5	1	2	2	1	2	2	3	1	1	0			2	4	5	3	4	4	4	3	3	3	4	5	4	4	5	4	5
719	A	15	2	3	1	1	5	4	2	1	5	1	1	5	3	3	5	5	3	5	1	3	3	1	3	1	3	1	1	1			2	5	6	4	4	4	4	4	4	4	2	3	3	3	3	3	4
720	A	15	1	3	2	1	5	1	2	3	3	2	2	5	2	2	5	5	3	5	1	2	2	1	2	2	1	1	0		1		2	4	8	1	3	2	4	3	3	4	5	4	4	5	5	5	3
721	A	15	2	4	2	1	5	3	1	2	4	2	2	5	2	3	5	5	2	2	2	3	3	2	3	1	1	1	1	1			1	3	1	3	3	2	3	3	3	3	4	5	3	3	4	4	4
722	A	15	1	4	2	2	5	1	2	1	3	2	3	5	2	2	5	5	2	5	1	2	2	1	2	2	1	1	0		1		2	4	8	1	3	3	4	3	3	3	3	3	3	3	3	3	3
723	A	15	1	4	2	1	5	1	2	1	3	3	2	5	2	2	5	5	3	4	4	2	2	4	2	2	1	1	1	0			2	4	4	1	3	4	4	4	4	4	4	4	4	4	4	4	3
724	A	15	2	4	2	1	5	1	3	2	4	2	2	5	2	3	5	5	2	5	2	3	3	2	3	0		1	1	1			3	3	2	3	3	3	3	3	3	4	3	3	3	4	4	4	3
725	A	15	1	4	2	1	5	1	3	1	3	2	4	5	2	2	5	5	3	5	4	2	2	4	2	3	1	1	0		1		3	4	3	3	4	3	4	3	4	4	4	5	5	4	4	4	4
726	B	15	2	4	2	3	5	4	1	3	2	2	3	5	2	2	5	5	2	5	1	2	2	1	2	1	1	1	1	1			3	4	3	3	3	3	3	3	3	3	5	3	3	4	4	5	3
727	B	15	2	3	2	2	5	1	3	1	3	2	2	5	2	3	5	5	2	5	2	3	3	2	3	1	1	1	1	0			4	3	3	3	4	4	3	3	3	1	3	3	3	3	3	3	4
728	B	15	1	4	2	1	4	1	2	1	4	2	2	3	2	2	3	3	3	3	1	2	2	1	2	0		0				3		4	1	8	4	4	4	4	4	4	3	3	3	3	4	3	3
729	B	15	1	3	2	3	5	1	2	1	5	2	2	5	2	3	4	5	2	5	2	3	3	2	3	1	2	1	1	1			1	4	5	3	4	3	3	3	4	3	4	5	5	4	5	4	5
730	B	15	2	3	2	2	5	3	1	3	5	2	2	5	2	2	3	5	2	5	1	2	2	1	2	0		0				1		3	4	3	3	3	3	3	3	3	4	4	5	4	3	5	5
731	B	15	1	3	1	3	5	3	4	1	3	1	3	5	1	1	5	5	3	5	1	2	2	1	2	1	6	0				3		6	3	7	3	4	3	3	3	4	3	3	4	4	4	3	5
732	B	15	1	4	2	3	5	3	4	1	3	1	1	5	3	3	5	5	3	5	1	3	3	1	3	1	1	1	0		1		1	4	1	4	2	2	3	2	2	2	3	3	3	3	3	3	5
733	B	15	2	1	2	1	5	1	3	1	4	3	1	5	1	1	5	5	1	5	1	4	4	1	4	2	1	1	1	1			2	2	2	4	4	4	4	4	4	4	3	3	3	3	3	3	3
734	B	15	2	3	2	2	5	1	2	1	5	1	1	5	3	3	5	5	3	5	2	3	3	2	3	1	7	1	1	0			1	1	8	3	4	3	5	3	4	4	4	4	4	4	4	4	4
735	B	15	2	1	2	1	5	1	2	1	4	3	3	5	3	3	5	5	3	5	1	3	3	1	3	0		1	1	1			3	4	1	3	3	3	3	2	3	2	3	3	3	3	3	3	3
736	B	15	1	4	2	1	5	4	3	1	3	1	4	5	1	3	5	5	1	5	1	3	3	1	3	0		1	0		1		3	4	3	2	3	3	5	4	4	4	3	4	4	4	4	4	3
737	B	15	2	2	2	1	5	1	2	1	3	1	1	5	1	1	5	5	3	5	3	1	1	3	1	0		1	1	1			5	4	2	3	3	3	3	3	3	3	3	3	3	3	3	3	4
738	B	15	1	2	1	3	4	1	2	1	3	2	3	4	3	3	4	4	3	4	2	3	3	2	3	0		0				4		6	2	5	2	4	2	3	4	4	3	3	4	4	3	3	4
739	B	15	2	2	2	2	4	2	3	1	4	2	2	5	2	2	5	5	2	5	1	2	2	1	2	0		1	1	1			2	2	8	3	3	4	3	3	4	3	4	4	5	3	3	4	4
740	B	15	1	3	2	1	5	3	2	1	4	1	1	5	1	1	5	5	1	5	2	1	1	2	1	2	1	1	1	1			2	3	3	3	3	4	4	4	3	4	3	3	3	3	3	3	4
741	B	15	2	3	2	3	5	2	1	1	5	3	1	5	1	3	5	5	3	2	1	3	3	1	3	0		1	1	1			3	4	4	5	4	4	4	4	4	4	4	4	4	4	4	4	4
742	B	15	1	5	2	2	5	1	2	1	3	1	3	5	3	3	3	5	3	5	2	3	3	2	3	1	9	0				2		2	1	6	2	2	2	3	3	3	3	2	3	3	3	3	3
743	B	15	2	2	2	2	5	4	1	2	2	1	1	5	1	3	5	5	1	5	1	3	3	1	3	0		1	0		1		2	4	8	5	5	3	5	4	5	5	4	4	5	5	4	4	3
744	B	15	2	1	2	2	5	2	3	1	2	1	1	5	3	3	5	5	3	5	1	3	3	1	3	1	1	1	1	0			1	4	1	3	4	3	3	2	2	2	3	3	3	3	3	3	4
745	B	15	2	1	2	3	5	2	3	1	5	1	3	5	3	3	5	5	3	5	1	3	3	1	3	0		1	1	1			3	4	1	5	2	2	2	2	2	2	4	4	4	3	3	5	4
746	B	15	1	4	2	2	5	4	1	2	5	2	2	2	3	3	4	2	3	2	1	3	3	1	3	0		0				3		5	3	4	4	2	3	3	3	3	3	3	4	5	5	4	4
747	B	15	2	4	1	2	5	1	2	1	5	2	4	5	3	3	5	5	3	5	2	3	3	2	3	0		1	1	1			1	4	4	4	3	3	3	2	2	3	3	4	4	4	5	4	3
748	B	15	2	4	1	1	5	1	2	2	5	2	2	4	3	3	5	4	3	4	2	3	3	2	2	1	3	0				3		6	4	4	4	3	3	3	3	3	2	2	3	3	4	4	4
749	B	15	1	4	2	2	5	2	1	2	5	1	3	5	1	3	5	5	1	5	1	3	3	1	2	0		1	1	0			3	4	2	4	1	2	2	3	2	2	4	5	3	3	4	5	3
750	B	15	2	2	2	1	5	2	3	1	5	1	1	5	3	3	5	5	3	5	2	3	3	2	3	0		1	1	1			3	4	4	4	3	2	3	3	5	2	4	5	5	4	4	4	4
751	A	16	2	4	2	1	5	1	2	1	5	1	1	5	1	3	5	5	1	5	1	3	3	1	2	0		1	1	1			3	4	3	3	4	4	3	4	3	3	4	4	5	5	4	4	4
752	A	16	1	4	2	1	5	4	1	2	5	3	1	4	3	3	4	4	3	4	2	3	3	2	2	0		0				3		6	2	3	3	3	3	3	3	3	4	5	5	4	4	5	3
753	A	16	1	2	1	1	5	1	2	1	5	2	3	5	2	3	5	5	2	5	2	3	3	2	3	0		1	1	1			0	4	6	5	5	4	5	4	5	5	5	4	4	4	5	4	4
754	A	16	2	1	2	1	5	2	1	3	5	1	1	5	3	3	5	5	3	5	2	3	3	2	2	1	1	1	1	1			4	4	2	3	3	3	3	3	3	3	4	5	5	4	4	5	3
755	A	16	1	1	2	1	5	3	1	2	5	1	4	5	1	1	5	5	1	5	2	1	1	2	3	0		1	1	1			3	4	6	3	1	1	1	2	2	3	5	3	3	4	4	4	5
756	A	16	2	1	2	1	5	1	3	1	2	3	3	4	2	2	5	4	2	2	1	2	2	1	2	0		0				3		4	2	3	3	3	3	3	3	3	4	4	5	5	4	5	4
757	A	16	2	3	2	2	5	1	3	2	1	2	2	4	3	3	5	4	3	4	2	3	3	2	2	0		0				3		4	4	3	5	5	4	4	4	4	4	4	5	5	4	5	5
758	A	16	1	3	2	1	4	1	3	2	3	2	2	5	3	3	5	5	3	2	2	3	3	2	3	0		1	1	0			2	3	4	3	5	4	4	2	4	3	4	4	3	3	4	4	5
759	A	16	1	5	2	1	4	2	3	1	3	2	2	5	2	3	5	5	2	5	2	3	1	2	4	0		1	1	1			1	6	5	2	3	3	3	3	3	3	4	4	5	4	4	4	4
760	A	16	2	3	2	1	4	3	2	1	4	2	3	5	3	3	5	5	3	5	1	3	3	2	3	0		1	1	1			3	2	1	3	4	3	4	4	4	4	3	3	4	4	4	4	5
761	A	16	1	3	2	3	5	3	1	2	5	3	2	4	2	2	5	4	3	4	2	2	1	2	3	1	1	0				3		4	1	3	5	3	3	3	3	4	4	4	4	4	5	4	3
762	A	16	1	3	2	2	5	1	2	1	4	2	2	4	3	3	4	4	3	4	3	3	2	1	3	1	7	0				4		4	2	3	3	3	3	3	3	2	4	4	3	4	4	4	5
763	A	16	2	1	2	1	4	1	3	1	3	1	3	5	1	3	5	5	1	2	1	3	3	1	3	0		1	0		1		2	4	3	3	3	3	2	2	2	2	4	4	4	3	3	4	4
764	A	16	2	2	2	3	5	4	1	3	3	2	4	5	2	2	5	5	2	5	1	2	2	1	2	1	1	1	1	1			3	4	4	3	3	3	4	3	3	4	5	4	4	4	5	4	3
765	A	16	1	3	2	2	5	3	2	1	2	4	2	4	2	3	5	4	3	4	2	3	3	2	3	1	1	0				3		6	2	3	4	3	3	3	3	3	4	5	5	5	4	4	4
766	A	16	1	3	2	3	5	3	4	1	3	2	2	5	3	3	5	5	3	5	1	3	2	1	3	1	1	1	1	1			2	6	2	9	5	5	5	4	5	5	5	5	5	5	5	5	4
767	A	16	1	3	2	3	5	2	3	1	4	2	3	3	2	2	4	3	2	3	1	2	2	4	2	0		0				3		6	2	5	4	4	4	4	4	3	4	4	3	3	4	4	4
768	A	16	2	4	2	1	5	1	3	1	3	2	4	5	2	2	5	5	3	5	4	2	2	4	2	3	1	1	0		1		3	4	3	3	4	3	4	3	4	4	4	5	5	4	4	4	4
769	A	16	2	4	2	3	5	4	1	3	2	2	3	5	2	2	5	5	2	5	1	2	2	1	2	1	1	1	1	1			3	4	3	3	3	3	3	3	3	3	5	3	3	4	4	5	3
770	A	16	2	3	2	2	5	1	3	1	3	2	2	5	2	3	5	5	2	5	2	3	3	2	3	1	1	1	1	0			4	3	3	3	4	4	3	3	3	1	3	3	3	3	3	3	4
771	A	16	1	4	2	1	4	1	2	1	4	2	2	3	2	2	3	3	3	3	1	2	2	1	2	0		0				3		4	1	8	4	4	4	4	4	4	3	3	3	3	4	3	3
772	A	16	2	3	2	3	5	1	2	1	5	2	2	5	2	3	4	5	2	5	2	3	3	2	3	1	2	1	1	1			1	4	5	3	4	3	3	3	4	3	4	5	5	4	5	4	5
773	A	16	2	3	2	2	5	3	1	3	5	2	2	5	2	2	3	5	2	5	1	2	2	1	2	0		0				1		3	4	3	3	3	3	3	3	3	4	4	5	4	3	5	5
774	A	16	1	3	1	3	5	3	4	1	3	1	3	5	1	1	5	5	3	5	1	2	2	1	2	1	6	0				3		6	3	7	3	4	3	3	3	4	3	3	4	4	4	3	5
775	A	16	1	4	2	3	5	3	4	1	3	1	1	5	3	3	5	5	3	5	1	3	3	1	3	1	1	1	0		1		1	4	1	4	2	2	3	2	2	2	3	3	3	3	3	3	5
776	B	16	2	1	2	1	5	1	3	1	4	3	1	5	1	1	5	5	1	5	1	4	4	1	4	2	1	1	1	1			2	2	2	4	4	4	4	4	4	4	3	3	3	3	3	3	3
777	B	16	2	3	2	2	5	1	2	1	5	1	1	5	3	3	5	5	3	5	2	3	3	2	3	1	7	1	1	0			1	1	8	3	4	3	5	3	4	4	4	4	4	4	4	4	4
778	B	16	2	1	2	1	5	1	2	1	4	3	3	5	3	3	5	5	3	5	1	3	3	1	3	0		1	1	1			3	4	1	3	3	3	3	2	3	2	3	3	3	3	3	3	3
779	B	16	1	4	2	1	5	4	3	1	3	1	4	5	1	3	5	5	1	5	1	3	3	1	3	0		1	0		1		3	4	3	2	3	3	5	4	4	4	3	4	4	4	4	4	3
780	B	16	1	2	2	1	5	1	2	1	3	1	1	5	1	1	5	5	3	5	3	1	1	3	1	0		1	1	1			5	4	2	3	3	3	3	3	3	3	3	3	3	3	3	3	4
781	B	16	2	2	1	3	4	1	2	1	3	2	3	4	3	3	4	4	3	4	2	3	3	2	3	0		0				4		6	2	5	2	4	2	3	4	4	3	3	4	4	3	3	4
782	B	16	2	2	2	2	4	2	3	1	4	2	2	5	2	2	5	5	2	5	1	2	2	1	2	0		1	1	1			2	2	8	3	3	4	3	3	4	3	4	4	5	3	3	4	4
783	B	16	1	3	2	1	5	3	2	1	4	1	1	5	1	1	5	5	1	5	2	1	1	2	1	2	1	1	1	1			2	3	3	3	3	4	4	4	3	4	3	3	3	3	3	3	4
784	B	16	2	3	2	3	5	2	1	1	5	3	1	5	1	3	5	5	3	2	1	3	3	1	3	0		1	1	1			3	4	4	5	4	4	4	4	4	4	4	4	4	4	4	4	4
785	B	16	1	5	2	2	5	1	2	1	3	1	3	5	3	3	3	5	3	5	2	3	3	2	3	1	9	0				2		2	1	6	2	2	2	3	3	3	3	2	3	3	3	3	3
786	B	16	2	2	2	2	5	4	1	2	2	1	1	5	1	3	5	5	1	5	1	3	3	1	3	0		1	0		1		2	4	8	5	5	3	5	4	5	5	4	4	5	5	4	4	3
787	B	16	1	1	2	2	5	2	3	1	2	1	1	5	3	3	5	5	3	5	1	3	3	1	3	1	1	1	1	0			1	4	1	3	4	3	3	2	2	2	3	3	3	3	3	3	4
788	B	16	2	1	2	3	5	2	3	1	5	1	3	5	3	3	5	5	3	5	1	3	3	1	3	0		1	1	1			3	4	1	5	2	2	2	2	2	2	4	4	4	3	3	5	4
789	B	16	1	4	2	2	5	4	1	2	5	2	2	2	3	3	4	2	3	2	1	3	3	1	3	0		0				3		5	3	4	4	2	3	3	3	3	3	3	4	5	5	4	4
790	B	16	2	4	1	2	5	1	2	1	5	2	4	5	3	3	5	5	3	5	2	3	3	2	3	0		1	1	1			1	4	4	4	3	3	3	2	2	3	3	4	4	4	5	4	3
791	B	16	1	4	1	1	5	1	2	2	5	2	2	4	3	3	5	4	3	4	2	3	3	2	2	1	3	0				3		6	4	4	4	3	3	3	3	3	2	2	3	3	4	4	4
792	B	16	1	4	2	2	5	2	1	2	5	1	3	5	1	3	5	5	1	5	1	3	3	1	2	0		1	1	0			3	4	2	4	1	2	2	3	2	2	4	5	3	3	4	5	3
793	B	16	2	2	2	1	5	2	3	1	5	1	1	5	3	3	5	5	3	5	2	3	3	2	3	0		1	1	1			3	4	4	4	3	2	3	3	5	2	4	5	5	4	4	4	4
794	B	16	2	4	2	1	5	1	2	1	5	1	1	5	1	3	5	5	1	5	1	3	3	1	2	0		1	1	1			3	4	3	3	4	4	3	4	3	3	4	4	5	5	4	4	4
795	B	16	1	4	2	1	5	4	1	2	5	3	1	4	3	3	4	4	3	4	2	3	3	2	2	0		0				3		6	2	3	3	3	3	3	3	3	4	5	5	4	4	5	3
796	B	16	1	2	1	1	5	1	2	1	5	2	3	5	2	3	5	5	2	5	2	3	3	2	3	0		1	1	1			0	4	6	5	5	4	5	4	5	5	5	4	4	4	5	4	4
797	B	16	1	1	2	1	5	2	1	3	5	1	1	5	3	3	5	5	3	5	2	3	3	2	2	1	1	1	1	1			4	4	2	3	3	3	3	3	3	3	4	5	5	4	4	5	3
798	B	16	2	1	2	1	5	3	1	2	5	1	4	5	1	1	5	5	1	5	2	1	1	2	3	0		1	1	1			3	4	6	3	1	1	1	2	2	3	5	3	3	4	4	4	5
799	B	16	1	1	2	1	5	1	3	1	2	3	3	4	2	2	5	4	2	2	1	2	2	1	2	0		0				3		4	2	3	3	3	3	3	3	3	4	4	5	5	4	5	4
800	B	16	2	3	2	2	5	1	3	2	1	2	2	4	3	3	5	4	3	4	2	3	3	2	2	0		0				3		4	4	3	5	5	4	4	4	4	4	4	5	5	4	5	5
801	A	17	1	3	2	1	4	1	3	2	3	2	2	5	3	3	5	5	3	2	2	3	3	2	3	0		1	1	0			2	3	4	3	5	4	4	2	4	3	4	4	3	3	4	4	5
802	A	17	2	5	2	1	4	2	3	1	3	2	2	5	2	3	5	5	2	5	2	3	1	2	4	0		1	1	1			1	6	5	2	3	3	3	3	3	3	4	4	5	4	4	4	4
803	A	17	1	3	2	1	4	3	2	1	4	2	3	5	3	3	5	5	3	5	1	3	3	2	3	0		1	1	1			3	2	1	3	4	3	4	4	4	4	3	3	4	4	4	4	5
804	A	17	1	3	2	3	5	3	1	2	5	3	2	4	2	2	5	4	3	4	2	2	1	2	3	1	1	0				3		4	1	3	5	3	3	3	3	4	4	4	4	4	5	4	3
805	A	17	2	3	2	2	5	1	2	1	4	2	2	4	3	3	4	4	3	4	3	3	2	1	3	1	7	0				4		4	2	3	3	3	3	3	3	2	4	4	3	4	4	4	5
806	A	17	2	1	2	1	4	1	3	1	3	1	3	5	1	3	5	5	1	2	1	3	3	1	3	0		1	0		1		2	4	3	3	3	3	2	2	2	2	4	4	4	3	3	4	4
807	A	17	2	2	2	3	5	4	1	3	3	2	4	5	2	2	5	5	2	5	1	2	2	1	2	1	1	1	1	1			3	4	4	3	3	3	4	3	3	4	5	4	4	4	5	4	3
808	A	17	2	3	2	2	5	3	2	1	2	4	2	4	2	3	5	4	3	4	2	3	3	2	3	1	1	0				3		6	2	3	4	3	3	3	3	3	4	5	5	5	4	4	4
809	A	17	1	3	2	3	5	3	4	1	3	2	2	5	3	3	5	5	3	5	1	3	2	1	3	1	1	1	1	1			2	6	2	9	5	5	5	4	5	5	5	5	5	5	5	5	4
810	A	17	1	3	2	3	5	2	3	1	4	2	3	3	2	2	4	3	2	3	1	2	2	4	2	0		0				3		6	2	5	4	4	4	4	4	3	4	4	3	3	4	4	4
811	A	17	2	4	2	1	5	2	1	2	2	4	2	5	3	3	5	5	3	5	2	3	3	2	3	1	1	1	1	1			1	4	1	5	4	3	5	4	4	4	5	5	5	5	5	5	5
812	A	17	2	3	2	2	4	4	1	2	5	1	1	4	1	1	5	4	1	2	3	1	2	4	1	0		1	0		1		3	4	1	3	2	2	3	3	3	3	4	4	4	4	4	4	3
813	A	17	1	4	2	1	5	2	3	1	3	1	3	3	1	3	3	3	1	3	1	3	2	1	3	1	2	0				2		4	4	5	5	3	3	4	4	3	5	5	5	5	5	5	5
814	A	17	2	2	2	1	5	2	3	1	3	3	4	5	3	3	5	5	3	5	2	3	3	2	3	1	1	1	0		1		2	4	1	5	2	3	3	2	3	3	2	2	2	2	2	2	3
815	A	17	2	3	1	1	4	2	3	1	4	2	2	5	2	3	5	5	2	5	2	3	2	1	3	0		1	1	1			0	4	6	5	3	3	3	3	2	3	5	5	5	5	5	5	3
816	A	17	2	2	2	3	5	3	1	3	3	1	3	5	1	1	5	5	1	5	2	1	3	2	2	1	1	1	1	0			3	6	2	3	3	2	3	3	3	2	3	3	3	3	4	4	4
817	A	17	1	4	2	2	5	3	1	3	4	3	2	4	3	3	4	4	3	4	2	3	2	1	2	1	1	0				3		4	2	3	3	2	3	3	3	3	5	5	5	5	5	5	4
818	A	17	2	4	2	1	5	1	2	1	3	2	2	5	2	2	5	5	2	2	3	2	2	1	3	1	1	1	1	0			1	4	1	3	4	2	3	3	5	4	5	5	5	5	5	5	4
819	A	17	2	4	2	3	5	1	2	1	5	4	3	5	1	1	5	5	1	5	2	1	3	1	2	0	1	1	0		1		2	4	4	3	5	2	4	5	5	5	5	5	5	5	3	5	4
820	A	17	1	5	2	2	5	3	2	4	5	2	2	4	2	3	5	4	2	4	2	3	4	1	2	0	2	0				3		3	2	3	4	5	5	4	5	5	4	4	3	4	4	4	4
821	A	17	1	5	2	2	5	1	2	1	5	4	4	5	3	3	5	5	3	5	2	3	3	2	3	1	1	1	1	1			2	4	1	5	2	1	5	3	4	4	4	4	4	4	4	4	4
822	A	17	2	4	2	1	5	3	1	3	3	2	2	5	2	2	5	5	2	5	2	1	1	2	1	1	1	1	1	1			3	4	3	3	3	4	3	3	3	3	3	3	3	3	3	3	4
823	A	17	2	5	1	2	5	1	2	1	2	1	1	5	3	3	5	5	3	5	3	2	2	3	2	1	9	1	1	1			2	6	4	9	2	3	2	2	2	2	4	4	5	3	3	4	4
824	A	17	1	2	2	1	5	3	1	2	4	2	2	5	2	2	5	5	2	5	2	1	1	2	1	1	10	1	0		1		4	2	2	3	3	3	3	4	3	3	4	4	4	5	5	4	5
825	A	17	1	4	2	1	5	3	1	3	4	2	2	4	2	3	4	4	3	4	2	3	3	2	3	3	10	0				3		2	4	3	5	5	5	4	4	5	5	5	4	4	5	4	4
826	B	17	2	4	2	1	5	3	1	3	3	3	4	5	2	2	5	5	2	5	2	1	1	2	1	1	1	1	0		1		3	2	4	3	2	3	4	4	3	3	5	4	4	5	5	4	5
827	B	17	1	5	2	1	5	1	3	1	4	2	3	5	2	2	5	5	2	5	1	2	2	1	2	2	3	1	1	0			2	4	5	3	4	4	4	3	3	3	4	5	4	4	5	4	5
828	B	17	2	3	1	1	5	4	2	1	5	1	1	5	3	3	5	5	3	5	1	3	3	1	3	1	3	1	1	1			2	5	6	4	4	4	4	4	4	4	2	3	3	3	3	3	4
829	B	17	1	3	2	1	5	1	2	3	3	2	2	5	2	2	5	5	3	5	1	2	2	1	2	2	1	1	0		1		2	4	8	1	3	2	4	3	3	4	5	4	4	5	5	5	3
830	B	17	2	4	2	1	5	3	1	2	4	2	2	5	2	3	5	5	2	2	2	3	3	2	3	1	1	1	1	1			1	3	1	3	3	2	3	3	3	3	4	5	3	3	4	4	4
831	B	17	1	4	2	2	5	1	2	1	3	2	3	5	2	2	5	5	2	5	1	2	2	1	2	2	1	1	0		1		2	4	8	1	3	3	4	3	3	3	3	3	3	3	3	3	3
832	B	17	1	4	2	1	5	1	2	1	3	3	2	5	2	2	5	5	3	4	4	2	2	4	2	2	1	1	1	0			2	4	4	1	3	4	4	4	4	4	4	4	4	4	4	4	3
833	B	17	2	4	2	1	5	1	3	2	4	2	2	5	2	3	5	5	2	5	2	3	3	2	3	0		1	1	1			3	3	2	3	3	3	3	3	3	4	3	3	3	4	4	4	3
834	B	17	2	4	2	1	5	1	3	1	3	2	4	5	2	2	5	5	3	5	4	2	2	4	2	3	1	1	0		1		3	4	3	3	4	3	4	3	4	4	4	5	5	4	4	4	4
835	B	17	1	4	2	3	5	4	1	3	2	2	3	5	2	2	5	5	2	5	1	2	2	1	2	1	1	1	1	1			3	4	3	3	3	3	3	3	3	3	5	3	3	4	4	5	3
836	B	17	2	3	2	2	5	1	3	1	3	2	2	5	2	3	5	5	2	5	2	3	3	2	3	1	1	1	1	0			4	3	3	3	4	4	3	3	3	1	3	3	3	3	3	3	4
837	B	17	1	4	2	1	4	1	2	1	4	2	2	3	2	2	3	3	3	3	1	2	2	1	2	0		0				3		4	1	8	4	4	4	4	4	4	3	3	3	3	4	3	3
838	B	17	2	3	2	3	5	1	2	1	5	2	2	5	2	3	4	5	2	5	2	3	3	2	3	1	2	1	1	1			1	4	5	3	4	3	3	3	4	3	4	5	5	4	5	4	5
839	B	17	2	3	2	2	5	3	1	3	5	2	2	5	2	2	3	5	2	5	1	2	2	1	2	0		0				1		3	4	3	3	3	3	3	3	3	4	4	5	4	3	5	5
840	B	17	1	3	1	3	5	3	4	1	3	1	3	5	1	1	5	5	3	5	1	2	2	1	2	1	6	0				3		6	3	7	3	4	3	3	3	4	3	3	4	4	4	3	5
841	B	17	1	4	2	3	5	3	4	1	3	1	1	5	3	3	5	5	3	5	1	3	3	1	3	1	1	1	0		1		1	4	1	4	2	2	3	2	2	2	3	3	3	3	3	3	5
842	B	17	2	1	2	1	5	1	3	1	4	3	1	5	1	1	5	5	1	5	1	4	4	1	4	2	1	1	1	1			2	2	2	4	4	4	4	4	4	4	3	3	3	3	3	3	3
843	B	17	2	3	2	2	5	1	2	1	5	1	1	5	3	3	5	5	3	5	2	3	3	2	3	1	7	1	1	0			1	1	8	3	4	3	5	3	4	4	4	4	4	4	4	4	4
844	B	17	2	1	2	1	5	1	2	1	4	3	3	5	3	3	5	5	3	5	1	3	3	1	3	0		1	1	1			3	4	1	3	3	3	3	2	3	2	3	3	3	3	3	3	3
845	B	17	1	4	2	1	5	4	3	1	3	1	4	5	1	3	5	5	1	5	1	3	3	1	3	0		1	0		1		3	4	3	2	3	3	5	4	4	4	3	4	4	4	4	4	3
846	B	17	2	2	2	1	5	1	2	1	3	1	1	5	1	1	5	5	3	5	3	1	1	3	1	0		1	1	1			5	4	2	3	3	3	3	3	3	3	3	3	3	3	3	3	4
847	B	17	2	2	1	3	4	1	2	1	3	2	3	4	3	3	4	4	3	4	2	3	3	2	3	0		0				4		6	2	5	2	4	2	3	4	4	3	3	4	4	3	3	4
848	B	17	1	2	2	2	4	2	3	1	4	2	2	5	2	2	5	5	2	5	1	2	2	1	2	0		1	1	1			2	2	8	3	3	4	3	3	4	3	4	4	5	3	3	4	4
849	B	17	2	3	2	1	5	3	2	1	4	1	1	5	1	1	5	5	1	5	2	1	1	2	1	2	1	1	1	1			2	3	3	3	3	4	4	4	3	4	3	3	3	3	3	3	4
850	B	17	2	3	2	3	5	2	1	1	5	3	1	5	1	3	5	5	3	2	1	3	3	1	3	0		1	1	1			3	4	4	5	4	4	4	4	4	4	4	4	4	4	4	4	4
851	A	18	1	5	2	2	5	1	2	1	3	1	3	5	3	3	3	5	3	5	2	3	3	2	3	1	9	0				2		2	1	6	2	2	2	3	3	3	3	2	3	3	3	3	3
852	A	18	1	2	2	2	5	4	1	2	2	1	1	5	1	3	5	5	1	5	1	3	3	1	3	0		1	0		1		2	4	8	5	5	3	5	4	5	5	4	4	5	5	4	4	3
853	A	18	2	1	2	2	5	2	3	1	2	1	1	5	3	3	5	5	3	5	1	3	3	1	3	1	1	1	1	0			1	4	1	3	4	3	3	2	2	2	3	3	3	3	3	3	4
854	A	18	1	1	2	3	5	2	3	1	5	1	3	5	3	3	5	5	3	5	1	3	3	1	3	0		1	1	1			3	4	1	5	2	2	2	2	2	2	4	4	4	3	3	5	4
855	A	18	1	4	2	2	5	4	1	2	5	2	2	2	3	3	4	2	3	2	1	3	3	1	3	0		0				3		5	3	4	4	2	3	3	3	3	3	3	4	5	5	4	4
856	A	18	2	4	1	2	5	1	2	1	5	2	4	5	3	3	5	5	3	5	2	3	3	2	3	0		1	1	1			1	4	4	4	3	3	3	2	2	3	3	4	4	4	5	4	3
857	A	18	1	4	1	1	5	1	2	2	5	2	2	4	3	3	5	4	3	4	2	3	3	2	2	1	3	0				3		6	4	4	4	3	3	3	3	3	2	2	3	3	4	4	4
858	A	18	2	4	2	2	5	2	1	2	5	1	3	5	1	3	5	5	1	5	1	3	3	1	2	0		1	1	0			3	4	2	4	1	2	2	3	2	2	4	5	3	3	4	5	3
859	A	18	2	2	2	1	5	2	3	1	5	1	1	5	3	3	5	5	3	5	2	3	3	2	3	0		1	1	1			3	4	4	4	3	2	3	3	5	2	4	5	5	4	4	4	4
860	A	18	1	4	2	1	5	1	2	1	5	1	1	5	1	3	5	5	1	5	1	3	3	1	2	0		1	1	1			3	4	3	3	4	4	3	4	3	3	4	4	5	5	4	4	4
861	A	18	1	4	2	1	5	4	1	2	5	3	1	4	3	3	4	4	3	4	2	3	3	2	2	0		0				3		6	2	3	3	3	3	3	3	3	4	5	5	4	4	5	3
862	A	18	1	2	1	1	5	1	2	1	5	2	3	5	2	3	5	5	2	5	2	3	3	2	3	0		1	1	1			0	4	6	5	5	4	5	4	5	5	5	4	4	4	5	4	4
863	A	18	2	1	2	1	5	2	1	3	5	1	1	5	3	3	5	5	3	5	2	3	3	2	2	1	1	1	1	1			4	4	2	3	3	3	3	3	3	3	4	5	5	4	4	5	3
864	A	18	2	1	2	1	5	3	1	2	5	1	4	5	1	1	5	5	1	5	2	1	1	2	3	0		1	1	1			3	4	6	3	1	1	1	2	2	3	5	3	3	4	4	4	5
865	A	18	2	1	2	1	5	1	3	1	2	3	3	4	2	2	5	4	2	2	1	2	2	1	2	0		0				3		4	2	3	3	3	3	3	3	3	4	4	5	5	4	5	4
866	A	18	1	3	2	2	5	1	3	2	1	2	2	4	3	3	5	4	3	4	2	3	3	2	2	0		0				3		4	4	3	5	5	4	4	4	4	4	4	5	5	4	5	5
867	A	18	1	3	2	1	4	1	3	2	3	2	2	5	3	3	5	5	3	2	2	3	3	2	3	0		1	1	0			2	3	4	3	5	4	4	2	4	3	4	4	3	3	4	4	5
868	A	18	2	5	2	1	4	2	3	1	3	2	2	5	2	3	5	5	2	5	2	3	1	2	4	0		1	1	1			1	6	5	2	3	3	3	3	3	3	4	4	5	4	4	4	4
869	A	18	2	3	2	1	4	3	2	1	4	2	3	5	3	3	5	5	3	5	1	3	3	2	3	0		1	1	1			3	2	1	3	4	3	4	4	4	4	3	3	4	4	4	4	5
870	A	18	1	3	2	3	5	3	1	2	5	3	2	4	2	2	5	4	3	4	2	2	1	2	3	1	1	0				3		4	1	3	5	3	3	3	3	4	4	4	4	4	5	4	3
871	A	18	2	3	2	2	5	1	2	1	4	2	2	4	3	3	4	4	3	4	3	3	2	1	3	1	7	0				4		4	2	3	3	3	3	3	3	2	4	4	3	4	4	4	5
872	A	18	2	1	2	1	4	1	3	1	3	1	3	5	1	3	5	5	1	2	1	3	3	1	3	0		1	0		1		2	4	3	3	3	3	2	2	2	2	4	4	4	3	3	4	4
873	A	18	2	2	2	3	5	4	1	3	3	2	4	5	2	2	5	5	2	5	1	2	2	1	2	1	1	1	1	1			3	4	4	3	3	3	4	3	3	4	5	4	4	4	5	4	3
874	A	18	1	3	2	2	5	3	2	1	2	4	2	4	2	3	5	4	3	4	2	3	3	2	3	1	1	0				3		6	2	3	4	3	3	3	3	3	4	5	5	5	4	4	4
875	A	18	1	4	2	1	5	1	3	1	3	2	4	5	2	2	5	5	3	5	4	2	2	4	2	3	1	1	0		1		3	4	3	3	4	3	4	3	4	4	4	5	5	4	4	4	4
876	B	18	2	4	2	3	5	4	1	3	2	2	3	5	2	2	5	5	2	5	1	2	2	1	2	1	1	1	1	1			3	4	3	3	3	3	3	3	3	3	5	3	3	4	4	5	3
877	B	18	2	3	2	2	5	1	3	1	3	2	2	5	2	3	5	5	2	5	2	3	3	2	3	1	1	1	1	0			4	3	3	3	4	4	3	3	3	1	3	3	3	3	3	3	4
878	B	18	1	4	2	1	4	1	2	1	4	2	2	3	2	2	3	3	3	3	1	2	2	1	2	0		0				3		4	1	8	4	4	4	4	4	4	3	3	3	3	4	3	3
879	B	18	1	3	2	3	5	1	2	1	5	2	2	5	2	3	4	5	2	5	2	3	3	2	3	1	2	1	1	1			1	4	5	3	4	3	3	3	4	3	4	5	5	4	5	4	5
880	B	18	2	3	2	2	5	3	1	3	5	2	2	5	2	2	3	5	2	5	1	2	2	1	2	0		0				1		3	4	3	3	3	3	3	3	3	4	4	5	4	3	5	5
881	B	18	1	3	1	3	5	3	4	1	3	1	3	5	1	1	5	5	3	5	1	2	2	1	2	1	6	0				3		6	3	7	3	4	3	3	3	4	3	3	4	4	4	3	5
882	B	18	1	4	2	3	5	3	4	1	3	1	1	5	3	3	5	5	3	5	1	3	3	1	3	1	1	1	0		1		1	4	1	4	2	2	3	2	2	2	3	3	3	3	3	3	5
883	B	18	2	1	2	1	5	1	3	1	4	3	1	5	1	1	5	5	1	5	1	4	4	1	4	2	1	1	1	1			2	2	2	4	4	4	4	4	4	4	3	3	3	3	3	3	3
884	B	18	2	3	2	2	5	1	2	1	5	1	1	5	3	3	5	5	3	5	2	3	3	2	3	1	7	1	1	0			1	1	8	3	4	3	5	3	4	4	4	4	4	4	4	4	4
885	B	18	2	1	2	1	5	1	2	1	4	3	3	5	3	3	5	5	3	5	1	3	3	1	3	0		1	1	1			3	4	1	3	3	3	3	2	3	2	3	3	3	3	3	3	3
886	B	18	1	4	2	1	5	4	3	1	3	1	4	5	1	3	5	5	1	5	1	3	3	1	3	0		1	0		1		3	4	3	2	3	3	5	4	4	4	3	4	4	4	4	4	3
887	B	18	2	2	2	1	5	1	2	1	3	1	1	5	1	1	5	5	3	5	3	1	1	3	1	0		1	1	1			5	4	2	3	3	3	3	3	3	3	3	3	3	3	3	3	4
888	B	18	2	2	1	3	4	1	2	1	3	2	3	4	3	3	4	4	3	4	2	3	3	2	3	0		0				4		6	2	5	2	4	2	3	4	4	3	3	4	4	3	3	4
889	B	18	1	2	2	2	4	2	3	1	4	2	2	5	2	2	5	5	2	5	1	2	2	1	2	0		1	1	1			2	2	8	3	3	4	3	3	4	3	4	4	5	3	3	4	4
890	B	18	2	3	2	1	5	3	2	1	4	1	1	5	1	1	5	5	1	5	2	1	1	2	1	2	1	1	1	1			2	3	3	3	3	4	4	4	3	4	3	3	3	3	3	3	4
891	B	18	1	3	2	3	5	2	1	1	5	3	1	5	1	3	5	5	3	2	1	3	3	1	3	0		1	1	1			3	4	4	5	4	4	4	4	4	4	4	4	4	4	4	4	4
892	B	18	2	5	2	2	5	1	2	1	3	1	3	5	3	3	3	5	3	5	2	3	3	2	3	1	9	0				2		2	1	6	2	2	2	3	3	3	3	2	3	3	3	3	3
893	B	18	1	2	2	2	5	4	1	2	2	1	1	5	1	3	5	5	1	5	1	3	3	1	3	0		1	0		1		2	4	8	5	5	3	5	4	5	5	4	4	5	5	4	4	3
894	B	18	2	1	2	2	5	2	3	1	2	1	1	5	3	3	5	5	3	5	1	3	3	1	3	1	1	1	1	0			1	4	1	3	4	3	3	2	2	2	3	3	3	3	3	3	4
895	B	18	2	1	2	3	5	2	3	1	5	1	3	5	3	3	5	5	3	5	1	3	3	1	3	0		1	1	1			3	4	1	5	2	2	2	2	2	2	4	4	4	3	3	5	4
896	B	18	1	4	2	2	5	4	1	2	5	2	2	2	3	3	4	2	3	2	1	3	3	1	3	0		0				3		5	3	4	4	2	3	3	3	3	3	3	4	5	5	4	4
897	B	18	1	4	1	2	5	1	2	1	5	2	4	5	3	3	5	5	3	5	2	3	3	2	3	0		1	1	1			1	4	4	4	3	3	3	2	2	3	3	4	4	4	5	4	3
898	B	18	2	4	1	1	5	1	2	2	5	2	2	4	3	3	5	4	3	4	2	3	3	2	2	1	3	0				3		6	4	4	4	3	3	3	3	3	2	2	3	3	4	4	4
899	B	18	1	4	2	2	5	2	1	2	5	1	3	5	1	3	5	5	1	5	1	3	3	1	2	0		1	1	0			3	4	2	4	1	2	2	3	2	2	4	5	3	3	4	5	3
900	B	19	2	2	2	1	5	2	3	1	5	1	1	5	3	3	5	5	3	5	2	3	3	2	3	0		1	1	1			3	4	4	4	3	2	3	3	5	2	4	5	5	4	4	4	4
901	A	19	1	4	2	1	5	1	2	1	5	1	1	5	1	3	5	5	1	5	1	3	3	1	2	0		1	1	1			3	4	3	3	4	4	3	4	3	3	4	4	5	5	4	4	4
902	A	19	2	4	2	1	5	4	1	2	5	3	1	4	3	3	4	4	3	4	2	3	3	2	2	0		0				3		6	2	3	3	3	3	3	3	3	4	5	5	4	4	5	3
903	A	19	1	2	1	1	5	1	2	1	5	2	3	5	2	3	5	5	2	5	2	3	3	2	3	0		1	1	1			0	4	6	5	5	4	5	4	5	5	5	4	4	4	5	4	4
904	A	19	1	1	2	1	5	2	1	3	5	1	1	5	3	3	5	5	3	5	2	3	3	2	2	1	1	1	1	1			4	4	2	3	3	3	3	3	3	3	4	5	5	4	4	5	3
905	A	19	2	1	2	1	5	3	1	2	5	1	4	5	1	1	5	5	1	5	2	1	1	2	3	0		1	1	1			3	4	6	3	1	1	1	2	2	3	5	3	3	4	4	4	5
906	A	19	1	1	2	1	5	1	3	1	2	3	3	4	2	2	5	4	2	2	1	2	2	1	2	0		0				3		4	2	3	3	3	3	3	3	3	4	4	5	5	4	5	4
907	A	19	2	3	2	2	5	1	3	2	1	2	2	4	3	3	5	4	3	4	2	3	3	2	2	0		0				3		4	4	3	5	5	4	4	4	4	4	4	5	5	4	5	5
908	A	19	1	3	2	1	4	1	3	2	3	2	2	5	3	3	5	5	3	2	2	3	3	2	3	0		1	1	0			2	3	4	3	5	4	4	2	4	3	4	4	3	3	4	4	5
909	A	19	2	5	2	1	4	2	3	1	3	2	2	5	2	3	5	5	2	5	2	3	1	2	4	0		1	1	1			1	6	5	2	3	3	3	3	3	3	4	4	5	4	4	4	4
910	A	19	1	3	2	1	4	3	2	1	4	2	3	5	3	3	5	5	3	5	1	3	3	2	3	0		1	1	1			3	2	1	3	4	3	4	4	4	4	3	3	4	4	4	4	5
911	A	19	1	3	2	3	5	3	1	2	5	3	2	4	2	2	5	4	3	4	2	2	1	2	3	1	1	0				3		4	1	3	5	3	3	3	3	4	4	4	4	4	5	4	3
912	A	19	2	3	2	2	5	1	2	1	4	2	2	4	3	3	4	4	3	4	3	3	2	1	3	1	7	0				4		4	2	3	3	3	3	3	3	2	4	4	3	4	4	4	5
913	A	19	1	1	2	1	4	1	3	1	3	1	3	5	1	3	5	5	1	2	1	3	3	1	3	0		1	0		1		2	4	3	3	3	3	2	2	2	2	4	4	4	3	3	4	4
914	A	19	2	2	2	3	5	4	1	3	3	2	4	5	2	2	5	5	2	5	1	2	2	1	2	1	1	1	1	1			3	4	4	3	3	3	4	3	3	4	5	4	4	4	5	4	3
915	A	19	2	3	2	2	5	3	2	1	2	4	2	4	2	3	5	4	3	4	2	3	3	2	3	1	1	0				3		6	2	3	4	3	3	3	3	3	4	5	5	5	4	4	4
916	A	19	1	3	2	3	5	3	4	1	3	2	2	5	3	3	5	5	3	5	1	3	2	1	3	1	1	1	1	1			2	6	2	9	5	5	5	4	5	5	5	5	5	5	5	5	4
917	A	19	1	3	2	3	5	2	3	1	4	2	3	3	2	2	4	3	2	3	1	2	2	4	2	0		0				3		6	2	5	4	4	4	4	4	3	4	4	3	3	4	4	4
918	A	19	1	4	2	1	5	2	1	2	2	4	2	5	3	3	5	5	3	5	2	3	3	2	3	1	1	1	1	1			1	4	1	5	4	3	5	4	4	4	5	5	5	5	5	5	5
919	A	19	2	3	2	2	4	4	1	2	5	1	1	4	1	1	5	4	1	2	3	1	2	4	1	0		1	0		1		3	4	1	3	2	2	3	3	3	3	4	4	4	4	4	4	3
920	A	19	2	4	2	1	5	2	3	1	3	1	3	3	1	3	3	3	1	3	1	3	2	1	3	1	2	0				2		4	4	5	5	3	3	4	4	3	5	5	5	5	5	5	5
921	A	19	1	2	2	1	5	2	3	1	3	3	4	5	3	3	5	5	3	5	2	3	3	2	3	1	1	1	0		1		2	4	1	5	2	3	3	2	3	3	2	2	2	2	2	2	3
922	A	19	2	3	1	1	4	2	3	1	4	2	2	5	2	3	5	5	2	5	2	3	2	1	3	0		1	1	1			0	4	6	5	3	3	3	3	2	3	5	5	5	5	5	5	3
923	A	19	1	2	2	3	5	3	1	3	3	1	3	5	1	1	5	5	1	5	2	1	3	2	2	1	1	1	1	0			3	6	2	3	3	2	3	3	3	2	3	3	3	3	4	4	4
924	A	19	2	4	2	2	5	3	1	3	4	3	2	4	3	3	4	4	3	4	2	3	2	1	2	1	1	0				3		4	2	3	3	2	3	3	3	3	5	5	5	5	5	5	4
925	A	19	1	4	2	1	5	1	2	1	3	2	2	5	2	2	5	5	2	2	3	2	2	1	3	1	1	1	1	0			1	4	1	3	4	2	3	3	5	4	5	5	5	5	5	5	4
926	B	19	2	4	2	3	5	1	2	1	5	4	3	5	1	1	5	5	1	5	2	1	3	1	2	0	1	1	0		1		2	4	4	3	5	2	4	5	5	5	5	5	5	5	3	5	4
927	B	19	1	5	2	2	5	3	2	4	5	2	2	4	2	3	5	4	2	4	2	3	4	1	2	0	2	0				3		3	2	3	4	5	5	4	5	5	4	4	3	4	4	4	4
928	B	19	1	5	2	2	5	1	2	1	5	4	4	5	3	3	5	5	3	5	2	3	3	2	3	1	1	1	1	1			2	4	1	5	2	1	5	3	4	4	4	4	4	4	4	4	4
929	B	19	2	4	2	1	5	3	1	3	3	2	2	5	2	2	5	5	2	5	2	1	1	2	1	1	1	1	1	1			3	4	3	3	3	4	3	3	3	3	3	3	3	3	3	3	4
930	B	19	2	5	1	2	5	1	2	1	2	1	1	5	3	3	5	5	3	5	3	2	2	3	2	1	9	1	1	1			2	6	4	9	2	3	2	2	2	2	4	4	5	3	3	4	4
931	B	19	1	2	2	1	5	3	1	2	4	2	2	5	2	2	5	5	2	5	2	1	1	2	1	1	10	1	0		1		4	2	2	3	3	3	3	4	3	3	4	4	4	5	5	4	5
932	B	19	2	4	2	1	5	3	1	3	4	2	2	4	2	3	4	4	3	4	2	3	3	2	3	3	10	0				3		2	4	3	5	5	5	4	4	5	5	5	4	4	5	4	4
933	B	19	1	4	2	1	5	3	1	3	3	3	4	5	2	2	5	5	2	5	2	1	1	2	1	1	1	1	0		1		3	2	4	3	2	3	4	4	3	3	5	4	4	5	5	4	5
934	B	19	2	5	2	1	5	1	3	1	4	2	3	5	2	2	5	5	2	5	1	2	2	1	2	2	3	1	1	0			2	4	5	3	4	4	4	3	3	3	4	5	4	4	5	4	5
935	B	19	1	3	1	1	5	4	2	1	5	1	1	5	3	3	5	5	3	5	1	3	3	1	3	1	3	1	1	1			2	5	6	4	4	4	4	4	4	4	2	3	3	3	3	3	4
936	B	19	1	3	2	1	5	1	2	3	3	2	2	5	2	2	5	5	3	5	1	2	2	1	2	2	1	1	0		1		2	4	8	1	3	2	4	3	3	4	5	4	4	5	5	5	3
937	B	19	2	4	2	1	5	3	1	2	4	2	2	5	2	3	5	5	2	2	2	3	3	2	3	1	1	1	1	1			1	3	1	3	3	2	3	3	3	3	4	5	3	3	4	4	4
938	B	19	1	4	2	2	5	1	2	1	3	2	3	5	2	2	5	5	2	5	1	2	2	1	2	2	1	1	0		1		2	4	8	1	3	3	4	3	3	3	3	3	3	3	3	3	3
939	B	19	1	4	2	1	5	1	2	1	3	3	2	5	2	2	5	5	3	4	4	2	2	4	2	2	1	1	1	0			2	4	4	1	3	4	4	4	4	4	4	4	4	4	4	4	3
940	B	19	2	4	2	1	5	1	3	2	4	2	2	5	2	3	5	5	2	5	2	3	3	2	3	0		1	1	1			3	3	2	3	3	3	3	3	3	4	3	3	3	4	4	4	3
941	B	19	1	4	2	1	5	1	3	1	3	2	4	5	2	2	5	5	3	5	4	2	2	4	2	3	1	1	0		1		3	4	3	3	4	3	4	3	4	4	4	5	5	4	4	4	4
942	B	19	2	4	2	3	5	4	1	3	2	2	3	5	2	2	5	5	2	5	1	2	2	1	2	1	1	1	1	1			3	4	3	3	3	3	3	3	3	3	5	3	3	4	4	5	3
943	B	19	1	3	2	2	5	1	3	1	3	2	2	5	2	3	5	5	2	5	2	3	3	2	3	1	1	1	1	0			4	3	3	3	4	4	3	3	3	1	3	3	3	3	3	3	4
944	B	19	1	4	2	1	4	1	2	1	4	2	2	3	2	2	3	3	3	3	1	2	2	1	2	0		0				3		4	1	8	4	4	4	4	4	4	3	3	3	3	4	3	3
945	B	19	2	3	2	3	5	1	2	1	5	2	2	5	2	3	4	5	2	5	2	3	3	2	3	1	2	1	1	1			1	4	5	3	4	3	3	3	4	3	4	5	5	4	5	4	5
946	B	19	2	3	2	2	5	3	1	3	5	2	2	5	2	2	3	5	2	5	1	2	2	1	2	0		0				1		3	4	3	3	3	3	3	3	3	4	4	5	4	3	5	5
947	B	19	1	3	1	3	5	3	4	1	3	1	3	5	1	1	5	5	3	5	1	2	2	1	2	1	6	0				3		6	3	7	3	4	3	3	3	4	3	3	4	4	4	3	5
948	B	19	1	4	2	3	5	3	4	1	3	1	1	5	3	3	5	5	3	5	1	3	3	1	3	1	1	1	0		1		1	4	1	4	2	2	3	2	2	2	3	3	3	3	3	3	5
949	B	19	2	1	2	1	5	1	3	1	4	3	1	5	1	1	5	5	1	5	1	4	4	1	4	2	1	1	1	1			2	2	2	4	4	4	4	4	4	4	3	3	3	3	3	3	3
950	B	20	1	3	2	2	5	1	2	1	5	1	1	5	3	3	5	5	3	5	2	3	3	2	3	1	7	1	1	0			1	1	8	3	4	3	5	3	4	4	4	4	4	4	4	4	4
951	A	20	2	1	2	1	5	1	2	1	4	3	3	5	3	3	5	5	3	5	1	3	3	1	3	0		1	1	1			3	4	1	3	3	3	3	2	3	2	3	3	3	3	3	3	3
952	A	20	1	4	2	1	5	4	3	1	3	1	4	5	1	3	5	5	1	5	1	3	3	1	3	0		1	0		1		3	4	3	2	3	3	5	4	4	4	3	4	4	4	4	4	3
953	A	20	2	2	2	1	5	1	2	1	3	1	1	5	1	1	5	5	3	5	3	1	1	3	1	0		1	1	1			5	4	2	3	3	3	3	3	3	3	3	3	3	3	3	3	4
954	A	20	1	2	1	3	4	1	2	1	3	2	3	4	3	3	4	4	3	4	2	3	3	2	3	0		0				4		6	2	5	2	4	2	3	4	4	3	3	4	4	3	3	4
955	A	20	2	2	2	2	4	2	3	1	4	2	2	5	2	2	5	5	2	5	1	2	2	1	2	0		1	1	1			2	2	8	3	3	4	3	3	4	3	4	4	5	3	3	4	4
956	A	20	1	3	2	1	5	3	2	1	4	1	1	5	1	1	5	5	1	5	2	1	1	2	1	2	1	1	1	1			2	3	3	3	3	4	4	4	3	4	3	3	3	3	3	3	4
957	A	20	2	3	2	3	5	2	1	1	5	3	1	5	1	3	5	5	3	2	1	3	3	1	3	0		1	1	1			3	4	4	5	4	4	4	4	4	4	4	4	4	4	4	4	4
958	A	20	2	5	2	2	5	1	2	1	3	1	3	5	3	3	3	5	3	5	2	3	3	2	3	1	9	0				2		2	1	6	2	2	2	3	3	3	3	2	3	3	3	3	3
959	A	20	1	2	2	2	5	4	1	2	2	1	1	5	1	3	5	5	1	5	1	3	3	1	3	0		1	0		1		2	4	8	5	5	3	5	4	5	5	4	4	5	5	4	4	3
960	A	20	2	1	2	2	5	2	3	1	2	1	1	5	3	3	5	5	3	5	1	3	3	1	3	1	1	1	1	0			1	4	1	3	4	3	3	2	2	2	3	3	3	3	3	3	4
961	A	20	1	1	2	3	5	2	3	1	5	1	3	5	3	3	5	5	3	5	1	3	3	1	3	0		1	1	1			3	4	1	5	2	2	2	2	2	2	4	4	4	3	3	5	4
962	A	20	1	4	2	2	5	4	1	2	5	2	2	2	3	3	4	2	3	2	1	3	3	1	3	0		0				3		5	3	4	4	2	3	3	3	3	3	3	4	5	5	4	4
963	A	20	2	4	1	2	5	1	2	1	5	2	4	5	3	3	5	5	3	5	2	3	3	2	3	0		1	1	1			1	4	4	4	3	3	3	2	2	3	3	4	4	4	5	4	3
964	A	20	1	4	1	1	5	1	2	2	5	2	2	4	3	3	5	4	3	4	2	3	3	2	2	1	3	0				3		6	4	4	4	3	3	3	3	3	2	2	3	3	4	4	4
965	A	20	2	4	2	2	5	2	1	2	5	1	3	5	1	3	5	5	1	5	1	3	3	1	2	0		1	1	0			3	4	2	4	1	2	2	3	2	2	4	5	3	3	4	5	3
966	A	20	2	2	2	1	5	2	3	1	5	1	1	5	3	3	5	5	3	5	2	3	3	2	3	0		1	1	1			3	4	4	4	3	2	3	3	5	2	4	5	5	4	4	4	4
967	A	20	1	4	2	1	5	1	2	1	5	1	1	5	1	3	5	5	1	5	1	3	3	1	2	0		1	1	1			3	4	3	3	4	4	3	4	3	3	4	4	5	5	4	4	4
968	A	20	2	4	2	1	5	4	1	2	5	3	1	4	3	3	4	4	3	4	2	3	3	2	2	0		0				3		6	2	3	3	3	3	3	3	3	4	5	5	4	4	5	3
969	A	20	1	2	1	1	5	1	2	1	5	2	3	5	2	3	5	5	2	5	2	3	3	2	3	0		1	1	1			0	4	6	5	5	4	5	4	5	5	5	4	4	4	5	4	4
970	A	20	2	1	2	1	5	2	1	3	5	1	1	5	3	3	5	5	3	5	2	3	3	2	2	1	1	1	1	1			4	4	2	3	3	3	3	3	3	3	4	5	5	4	4	5	3
971	A	20	1	1	2	1	5	3	1	2	5	1	4	5	1	1	5	5	1	5	2	1	1	2	3	0		1	1	1			3	4	6	3	1	1	1	2	2	3	5	3	3	4	4	4	5
972	A	20	2	1	2	1	5	1	3	1	2	3	3	4	2	2	5	4	2	2	1	2	2	1	2	0		0				3		4	2	3	3	3	3	3	3	3	4	4	5	5	4	5	4
973	A	20	2	3	2	2	5	1	3	2	1	2	2	4	3	3	5	4	3	4	2	3	3	2	2	0		0				3		4	4	3	5	5	4	4	4	4	4	4	5	5	4	5	5
974	A	20	1	3	2	1	4	1	3	2	3	2	2	5	3	3	5	5	3	2	2	3	3	2	3	0		1	1	0			2	3	4	3	5	4	4	2	4	3	4	4	3	3	4	4	5
975	A	20	2	5	2	1	4	2	3	1	3	2	2	5	2	3	5	5	2	5	2	3	1	2	4	0		1	1	1			1	6	5	2	3	3	3	3	3	3	4	4	5	4	4	4	4
976	B	20	1	3	2	1	4	3	2	1	4	2	3	5	3	3	5	5	3	5	1	3	3	2	3	0		1	1	1			3	2	1	3	4	3	4	4	4	4	3	3	4	4	4	4	5
977	B	20	1	3	2	3	5	3	1	2	5	3	2	4	2	2	5	4	3	4	2	2	1	2	3	1	1	0				3		4	1	3	5	3	3	3	3	4	4	4	4	4	5	4	3
978	B	20	2	3	2	2	5	1	2	1	4	2	2	4	3	3	4	4	3	4	3	3	2	1	3	1	7	0				4		4	2	3	3	3	3	3	3	2	4	4	3	4	4	4	5
979	B	20	1	1	2	1	4	1	3	1	3	1	3	5	1	3	5	5	1	2	1	3	3	1	3	0		1	0		1		2	4	3	3	3	3	2	2	2	2	4	4	4	3	3	4	4
980	B	20	2	2	2	3	5	4	1	3	3	2	4	5	2	2	5	5	2	5	1	2	2	1	2	1	1	1	1	1			3	4	4	3	3	3	4	3	3	4	5	4	4	4	5	4	3
981	B	20	2	3	2	2	5	3	2	1	2	4	2	4	2	3	5	4	3	4	2	3	3	2	3	1	1	0				3		6	2	3	4	3	3	3	3	3	4	5	5	5	4	4	4
982	B	20	1	3	2	3	5	3	4	1	3	2	2	5	3	3	5	5	3	5	1	3	2	1	3	1	1	1	1	1			2	6	2	9	5	5	5	4	5	5	5	5	5	5	5	5	4
983	B	20	1	3	2	3	5	2	3	1	4	2	3	3	2	2	4	3	2	3	1	2	2	4	2	0		0				3		6	2	5	4	4	4	4	4	3	4	4	3	3	4	4	4
984	B	20	2	4	2	1	5	2	1	2	2	4	2	5	3	3	5	5	3	5	2	3	3	2	3	1	1	1	1	1			1	4	1	5	4	3	5	4	4	4	5	5	5	5	5	5	5
985	B	20	2	4	2	1	5	1	3	1	3	2	4	5	2	2	5	5	3	5	4	2	2	4	2	3	1	1	0		1		3	4	3	3	4	3	4	3	4	4	4	5	5	4	4	4	4
986	B	20	1	4	2	3	5	4	1	3	2	2	3	5	2	2	5	5	2	5	1	2	2	1	2	1	1	1	1	1			3	4	3	3	3	3	3	3	3	3	5	3	3	4	4	5	3
987	B	20	2	3	2	2	5	1	3	1	3	2	2	5	2	3	5	5	2	5	2	3	3	2	3	1	1	1	1	0			4	3	3	3	4	4	3	3	3	1	3	3	3	3	3	3	4
988	B	20	1	4	2	1	4	1	2	1	4	2	2	3	2	2	3	3	3	3	1	2	2	1	2	0		0				3		4	1	8	4	4	4	4	4	4	3	3	3	3	4	3	3
989	B	20	2	3	2	3	5	1	2	1	5	2	2	5	2	3	4	5	2	5	2	3	3	2	3	1	2	1	1	1			1	4	5	3	4	3	3	3	4	3	4	5	5	4	5	4	5
990	B	20	1	3	2	2	5	3	1	3	5	2	2	5	2	2	3	5	2	5	1	2	2	1	2	0		0				1		3	4	3	3	3	3	3	3	3	4	4	5	4	3	5	5
991	B	20	1	3	1	3	5	3	4	1	3	1	3	5	1	1	5	5	3	5	1	2	2	1	2	1	6	0				3		6	3	7	3	4	3	3	3	4	3	3	4	4	4	3	5
992	B	20	1	4	2	3	5	3	4	1	3	1	1	5	3	3	5	5	3	5	1	3	3	1	3	1	1	1	0		1		1	4	1	4	2	2	3	2	2	2	3	3	3	3	3	3	5
993	B	20	2	1	2	1	5	1	3	1	4	3	1	5	1	1	5	5	1	5	1	4	4	1	4	2	1	1	1	1			2	2	2	4	4	4	4	4	4	4	3	3	3	3	3	3	3
994	B	20	1	3	2	2	5	1	2	1	5	1	1	5	3	3	5	5	3	5	2	3	3	2	3	1	7	1	1	0			1	1	8	3	4	3	5	3	4	4	4	4	4	4	4	4	4
995	B	20	2	1	2	1	5	1	2	1	4	3	3	5	3	3	5	5	3	5	1	3	3	1	3	0		1	1	1			3	4	1	3	3	3	3	2	3	2	3	3	3	3	3	3	3
996	B	20	1	4	2	1	5	4	3	1	3	1	4	5	1	3	5	5	1	5	1	3	3	1	3	0		1	0		1		3	4	3	2	3	3	5	4	4	4	3	4	4	4	4	4	3
997	B	20	2	2	2	1	5	1	2	1	3	1	1	5	1	1	5	5	3	5	3	1	1	3	1	0		1	1	1			5	4	2	3	3	3	3	3	3	3	3	3	3	3	3	3	4
998	B	20	2	2	1	3	4	1	2	1	3	2	3	4	3	3	4	4	3	4	2	3	3	2	3	0		0				4		6	2	5	2	4	2	3	4	4	3	3	4	4	3	3	4
999	B	20	1	2	2	2	4	2	3	1	4	2	2	5	2	2	5	5	2	5	1	2	2	1	2	0		1	1	1			2	2	8	3	3	4	3	3	4	3	4	4	5	3	3	4	4
1000	B	21	1	3	2	1	5	3	2	1	4	1	1	5	1	1	5	5	1	5	2	1	1	2	1	2	1	1	1	1			2	3	3	3	3	4	4	4	3	4	3	3	3	3	3	3	4
1001	A	21	2	3	2	3	5	2	1	1	5	3	1	5	1	3	5	5	3	2	1	3	3	1	3	0		1	1	1			3	4	4	5	4	4	4	4	4	4	4	4	4	4	4	4	4
1002	A	21	1	5	2	2	5	1	2	1	3	1	3	5	3	3	3	5	3	5	2	3	3	2	3	1	9	0				2		2	1	6	2	2	2	3	3	3	3	2	3	3	3	3	3
1003	A	21	1	2	2	2	5	4	1	2	2	1	1	5	1	3	5	5	1	5	1	3	3	1	3	0		1	0		1		2	4	8	5	5	3	5	4	5	5	4	4	5	5	4	4	3
1004	A	21	2	1	2	2	5	2	3	1	2	1	1	5	3	3	5	5	3	5	1	3	3	1	3	1	1	1	1	0			1	4	1	3	4	3	3	2	2	2	3	3	3	3	3	3	4
1005	A	21	2	1	2	3	5	2	3	1	5	1	3	5	3	3	5	5	3	5	1	3	3	1	3	0		1	1	1			3	4	1	5	2	2	2	2	2	2	4	4	4	3	3	5	4
1006	A	21	1	4	2	2	5	4	1	2	5	2	2	2	3	3	4	2	3	2	1	3	3	1	3	0		0				3		5	3	4	4	2	3	3	3	3	3	3	4	5	5	4	4
1007	A	21	2	4	1	2	5	1	2	1	5	2	4	5	3	3	5	5	3	5	2	3	3	2	3	0		1	1	1			1	4	4	4	3	3	3	2	2	3	3	4	4	4	5	4	3
1008	A	21	1	4	1	1	5	1	2	2	5	2	2	4	3	3	5	4	3	4	2	3	3	2	2	1	3	0				3		6	4	4	4	3	3	3	3	3	2	2	3	3	4	4	4
1009	A	21	2	4	2	2	5	2	1	2	5	1	3	5	1	3	5	5	1	5	1	3	3	1	2	0		1	1	0			3	4	2	4	1	2	2	3	2	2	4	5	3	3	4	5	3
1010	A	21	2	2	2	1	5	2	3	1	5	1	1	5	3	3	5	5	3	5	2	3	3	2	3	0		1	1	1			3	4	4	4	3	2	3	3	5	2	4	5	5	4	4	4	4
1011	A	21	1	4	2	1	5	1	2	1	5	1	1	5	1	3	5	5	1	5	1	3	3	1	2	0		1	1	1			3	4	3	3	4	4	3	4	3	3	4	4	5	5	4	4	4
1012	A	21	2	4	2	1	5	4	1	2	5	3	1	4	3	3	4	4	3	4	2	3	3	2	2	0		0				3		6	2	3	3	3	3	3	3	3	4	5	5	4	4	5	3
1013	A	21	1	2	1	1	5	1	2	1	5	2	3	5	2	3	5	5	2	5	2	3	3	2	3	0		1	1	1			0	4	6	5	5	4	5	4	5	5	5	4	4	4	5	4	4
1014	A	21	1	1	2	1	5	2	1	3	5	1	1	5	3	3	5	5	3	5	2	3	3	2	2	1	1	1	1	1			4	4	2	3	3	3	3	3	3	3	4	5	5	4	4	5	3
1015	A	21	2	1	2	1	5	3	1	2	5	1	4	5	1	1	5	5	1	5	2	1	1	2	3	0		1	1	1			3	4	6	3	1	1	1	2	2	3	5	3	3	4	4	4	5
1016	A	21	1	1	2	1	5	1	3	1	2	3	3	4	2	2	5	4	2	2	1	2	2	1	2	0		0				3		4	2	3	3	3	3	3	3	3	4	4	5	5	4	5	4
1017	A	21	2	3	2	2	5	1	3	2	1	2	2	4	3	3	5	4	3	4	2	3	3	2	2	0		0				3		4	4	3	5	5	4	4	4	4	4	4	5	5	4	5	5
1018	A	21	1	3	2	1	4	1	3	2	3	2	2	5	3	3	5	5	3	2	2	3	3	2	3	0		1	1	0			2	3	4	3	5	4	4	2	4	3	4	4	3	3	4	4	5
1019	A	21	2	5	2	1	4	2	3	1	3	2	2	5	2	3	5	5	2	5	2	3	1	2	4	0		1	1	1			1	6	5	2	3	3	3	3	3	3	4	4	5	4	4	4	4
1020	A	21	2	3	2	1	4	3	2	1	4	2	3	5	3	3	5	5	3	5	1	3	3	2	3	0		1	1	1			3	2	1	3	4	3	4	4	4	4	3	3	4	4	4	4	5
1021	A	21	1	3	2	3	5	3	1	2	5	3	2	4	2	2	5	4	3	4	2	2	1	2	3	1	1	0				3		4	1	3	5	3	3	3	3	4	4	4	4	4	5	4	3
1022	A	21	2	3	2	2	5	1	2	1	4	2	2	4	3	3	4	4	3	4	3	3	2	1	3	1	7	0				4		4	2	3	3	3	3	3	3	2	4	4	3	4	4	4	5
1023	A	21	1	1	2	1	4	1	3	1	3	1	3	5	1	3	5	5	1	2	1	3	3	1	3	0		1	0		1		2	4	3	3	3	3	2	2	2	2	4	4	4	3	3	4	4
1024	A	21	2	2	2	3	5	4	1	3	3	2	4	5	2	2	5	5	2	5	1	2	2	1	2	1	1	1	1	1			3	4	4	3	3	3	4	3	3	4	5	4	4	4	5	4	3
1025	A	21	1	3	2	2	5	3	2	1	2	4	2	4	2	3	5	4	3	4	2	3	3	2	3	1	1	0				3		6	2	3	4	3	3	3	3	3	4	5	5	5	4	4	4
1026	B	21	1	3	2	3	5	3	4	1	3	2	2	5	3	3	5	5	3	5	1	3	2	1	3	1	1	1	1	1			2	6	2	9	5	5	5	4	5	5	5	5	5	5	5	5	4
1027	B	21	1	3	2	3	5	2	3	1	4	2	3	3	2	2	4	3	2	3	1	2	2	4	2	0		0				3		6	2	5	4	4	4	4	4	3	4	4	3	3	4	4	4
1028	B	21	2	4	2	1	5	2	1	2	2	4	2	5	3	3	5	5	3	5	2	3	3	2	3	1	1	1	1	1			1	4	1	5	4	3	5	4	4	4	5	5	5	5	5	5	5
1029	B	21	2	3	2	2	4	4	1	2	5	1	1	4	1	1	5	4	1	2	3	1	2	4	1	0		1	0		1		3	4	1	3	2	2	3	3	3	3	4	4	4	4	4	4	3
1030	B	21	1	4	2	1	5	2	3	1	3	1	3	3	1	3	3	3	1	3	1	3	2	1	3	1	2	0				2		4	4	5	5	3	3	4	4	3	5	5	5	5	5	5	5
1031	B	21	1	2	2	1	5	2	3	1	3	3	4	5	3	3	5	5	3	5	2	3	3	2	3	1	1	1	0		1		2	4	1	5	2	3	3	2	3	3	2	2	2	2	2	2	3
1032	B	21	2	3	1	1	4	2	3	1	4	2	2	5	2	3	5	5	2	5	2	3	2	1	3	0		1	1	1			0	4	6	5	3	3	3	3	2	3	5	5	5	5	5	5	3
1033	B	21	2	2	2	3	5	3	1	3	3	1	3	5	1	1	5	5	1	5	2	1	3	2	2	1	1	1	1	0			3	6	2	3	3	2	3	3	3	2	3	3	3	3	4	4	4
1034	B	21	2	4	2	2	5	3	1	3	4	3	2	4	3	3	4	4	3	4	2	3	2	1	2	1	1	0				3		4	2	3	3	2	3	3	3	3	5	5	5	5	5	5	4
1035	B	21	1	4	2	1	5	1	2	1	3	2	2	5	2	2	5	5	2	2	3	2	2	1	3	1	1	1	1	0			1	4	1	3	4	2	3	3	5	4	5	5	5	5	5	5	4
1036	B	21	2	4	2	3	5	1	2	1	5	4	3	5	1	1	5	5	1	5	2	1	3	1	2	0	1	1	0		1		2	4	4	3	5	2	4	5	5	5	5	5	5	5	3	5	4
1037	B	21	2	5	2	2	5	3	2	4	5	2	2	4	2	3	5	4	2	4	2	3	4	1	2	0	2	0				3		3	2	3	4	5	5	4	5	5	4	4	3	4	4	4	4
1038	B	21	1	5	2	2	5	1	2	1	5	4	4	5	3	3	5	5	3	5	2	3	3	2	3	1	1	1	1	1			2	4	1	5	2	1	5	3	4	4	4	4	4	4	4	4	4
1039	B	21	2	4	2	1	5	3	1	3	3	2	2	5	2	2	5	5	2	5	2	1	1	2	1	1	1	1	1	1			3	4	3	3	3	4	3	3	3	3	3	3	3	3	3	3	4
1040	B	21	2	5	1	2	5	1	2	1	2	1	1	5	3	3	5	5	3	5	3	2	2	3	2	1	9	1	1	1			2	6	4	9	2	3	2	2	2	2	4	4	5	3	3	4	4
1041	B	21	2	2	2	1	5	3	1	2	4	2	2	5	2	2	5	5	2	5	2	1	1	2	1	1	10	1	0		1		4	2	2	3	3	3	3	4	3	3	4	4	4	5	5	4	5
1042	B	21	1	4	2	1	5	3	1	3	4	2	2	4	2	3	4	4	3	4	2	3	3	2	3	3	10	0				3		2	4	3	5	5	5	4	4	5	5	5	4	4	5	4	4
1043	B	21	2	4	2	1	5	3	1	3	3	3	4	5	2	2	5	5	2	5	2	1	1	2	1	1	1	1	0		1		3	2	4	3	2	3	4	4	3	3	5	4	4	5	5	4	5
1044	B	21	2	5	2	1	5	1	3	1	4	2	3	5	2	2	5	5	2	5	1	2	2	1	2	2	3	1	1	0			2	4	5	3	4	4	4	3	3	3	4	5	4	4	5	4	5
1045	B	21	1	3	1	1	5	4	2	1	5	1	1	5	3	3	5	5	3	5	1	3	3	1	3	1	3	1	1	1			2	5	6	4	4	4	4	4	4	4	2	3	3	3	3	3	4
1046	B	21	1	3	2	1	5	1	2	3	3	2	2	5	2	2	5	5	3	5	1	2	2	1	2	2	1	1	0		1		2	4	8	1	3	2	4	3	3	4	5	4	4	5	5	5	3
1047	B	21	2	4	2	1	5	3	1	2	4	2	2	5	2	3	5	5	2	2	2	3	3	2	3	1	1	1	1	1			1	3	1	3	3	2	3	3	3	3	4	5	3	3	4	4	4
1048	B	21	1	4	2	2	5	1	2	1	3	2	3	5	2	2	5	5	2	5	1	2	2	1	2	2	1	1	0		1		2	4	8	1	3	3	4	3	3	3	3	3	3	3	3	3	3
1049	B	21	1	4	2	1	5	1	2	1	3	3	2	5	2	2	5	5	3	4	4	2	2	4	2	2	1	1	1	0			2	4	4	1	3	4	4	4	4	4	4	4	4	4	4	4	3
1050	B	22	2	4	2	1	5	1	3	2	4	2	2	5	2	3	5	5	2	5	2	3	3	2	3	0		1	1	1			3	3	2	3	3	3	3	3	3	4	3	3	3	4	4	4	3
1051	A	22	1	4	2	1	5	1	3	1	3	2	4	5	2	2	5	5	3	5	4	2	2	4	2	3	1	1	0		1		3	4	3	3	4	3	4	3	4	4	4	5	5	4	4	4	4
1052	A	22	2	4	2	3	5	4	1	3	2	2	3	5	2	2	5	5	2	5	1	2	2	1	2	1	1	1	1	1			3	4	3	3	3	3	3	3	3	3	5	3	3	4	4	5	3
1053	A	22	2	3	2	2	5	1	3	1	3	2	2	5	2	3	5	5	2	5	2	3	3	2	3	1	1	1	1	0			4	3	3	3	4	4	3	3	3	1	3	3	3	3	3	3	4
1054	A	22	1	4	2	1	4	1	2	1	4	2	2	3	2	2	3	3	3	3	1	2	2	1	2	0		0				3		4	1	8	4	4	4	4	4	4	3	3	3	3	4	3	3
1055	A	22	2	3	2	3	5	1	2	1	5	2	2	5	2	3	4	5	2	5	2	3	3	2	3	1	2	1	1	1			1	4	5	3	4	3	3	3	4	3	4	5	5	4	5	4	5
1056	A	22	2	3	2	2	5	3	1	3	5	2	2	5	2	2	3	5	2	5	1	2	2	1	2	0		0				1		3	4	3	3	3	3	3	3	3	4	4	5	4	3	5	5
1057	A	22	1	3	1	3	5	3	4	1	3	1	3	5	1	1	5	5	3	5	1	2	2	1	2	1	6	0				3		6	3	7	3	4	3	3	3	4	3	3	4	4	4	3	5
1058	A	22	1	4	2	3	5	3	4	1	3	1	1	5	3	3	5	5	3	5	1	3	3	1	3	1	1	1	0		1		1	4	1	4	2	2	3	2	2	2	3	3	3	3	3	3	5
1059	A	22	2	1	2	1	5	1	3	1	4	3	1	5	1	1	5	5	1	5	1	4	4	1	4	2	1	1	1	1			2	2	2	4	4	4	4	4	4	4	3	3	3	3	3	3	3
1060	A	22	2	3	2	2	5	1	2	1	5	1	1	5	3	3	5	5	3	5	2	3	3	2	3	1	7	1	1	0			1	1	8	3	4	3	5	3	4	4	4	4	4	4	4	4	4
1061	A	22	2	1	2	1	5	1	2	1	4	3	3	5	3	3	5	5	3	5	1	3	3	1	3	0		1	1	1			3	4	1	3	3	3	3	2	3	2	3	3	3	3	3	3	3
1062	A	22	1	4	2	1	5	4	3	1	3	1	4	5	1	3	5	5	1	5	1	3	3	1	3	0		1	0		1		3	4	3	2	3	3	5	4	4	4	3	4	4	4	4	4	3
1063	A	22	2	2	2	1	5	1	2	1	3	1	1	5	1	1	5	5	3	5	3	1	1	3	1	0		1	1	1			5	4	2	3	3	3	3	3	3	3	3	3	3	3	3	3	4
1064	A	22	2	2	1	3	4	1	2	1	3	2	3	4	3	3	4	4	3	4	2	3	3	2	3	0		0				4		6	2	5	2	4	2	3	4	4	3	3	4	4	3	3	4
1065	A	22	1	2	2	2	4	2	3	1	4	2	2	5	2	2	5	5	2	5	1	2	2	1	2	0		1	1	1			2	2	8	3	3	4	3	3	4	3	4	4	5	3	3	4	4
1066	A	22	2	3	2	1	5	3	2	1	4	1	1	5	1	1	5	5	1	5	2	1	1	2	1	2	1	1	1	1			2	3	3	3	3	4	4	4	3	4	3	3	3	3	3	3	4
1067	A	22	2	3	2	3	5	2	1	1	5	3	1	5	1	3	5	5	3	2	1	3	3	1	3	0		1	1	1			3	4	4	5	4	4	4	4	4	4	4	4	4	4	4	4	4
1068	A	22	1	5	2	2	5	1	2	1	3	1	3	5	3	3	3	5	3	5	2	3	3	2	3	1	9	0				2		2	1	6	2	2	2	3	3	3	3	2	3	3	3	3	3
1069	A	22	2	2	2	2	5	4	1	2	2	1	1	5	1	3	5	5	1	5	1	3	3	1	3	0		1	0		1		2	4	8	5	5	3	5	4	5	5	4	4	5	5	4	4	3
1070	A	22	2	1	2	2	5	2	3	1	2	1	1	5	3	3	5	5	3	5	1	3	3	1	3	1	1	1	1	0			1	4	1	3	4	3	3	2	2	2	3	3	3	3	3	3	4
1071	A	22	2	1	2	3	5	2	3	1	5	1	3	5	3	3	5	5	3	5	1	3	3	1	3	0		1	1	1			3	4	1	5	2	2	2	2	2	2	4	4	4	3	3	5	4
1072	A	22	1	4	2	2	5	4	1	2	5	2	2	2	3	3	4	2	3	2	1	3	3	1	3	0		0				3		5	3	4	4	2	3	3	3	3	3	3	4	5	5	4	4
1073	A	22	2	4	1	2	5	1	2	1	5	2	4	5	3	3	5	5	3	5	2	3	3	2	3	0		1	1	1			1	4	4	4	3	3	3	2	2	3	3	4	4	4	5	4	3
1074	A	22	2	4	1	1	5	1	2	2	5	2	2	4	3	3	5	4	3	4	2	3	3	2	2	1	3	0				3		6	4	4	4	3	3	3	3	3	2	2	3	3	4	4	4
1075	A	22	2	4	2	2	5	2	1	2	5	1	3	5	1	3	5	5	1	5	1	3	3	1	2	0		1	1	0			3	4	2	4	1	2	2	3	2	2	4	5	3	3	4	5	3
1076	B	22	2	2	2	1	5	2	3	1	5	1	1	5	3	3	5	5	3	5	2	3	3	2	3	0		1	1	1			3	4	4	4	3	2	3	3	5	2	4	5	5	4	4	4	4
1077	B	22	2	4	2	1	5	1	2	1	5	1	1	5	1	3	5	5	1	5	1	3	3	1	2	0		1	1	1			3	4	3	3	4	4	3	4	3	3	4	4	5	5	4	4	4
1078	B	22	1	4	2	1	5	4	1	2	5	3	1	4	3	3	4	4	3	4	2	3	3	2	2	0		0				3		6	2	3	3	3	3	3	3	3	4	5	5	4	4	5	3
1079	B	22	1	2	1	1	5	1	2	1	5	2	3	5	2	3	5	5	2	5	2	3	3	2	3	0		1	1	1			0	4	6	5	5	4	5	4	5	5	5	4	4	4	5	4	4
1080	B	22	2	1	2	1	5	2	1	3	5	1	1	5	3	3	5	5	3	5	2	3	3	2	2	1	1	1	1	1			4	4	2	3	3	3	3	3	3	3	4	5	5	4	4	5	3
1081	B	22	2	1	2	1	5	3	1	2	5	1	4	5	1	1	5	5	1	5	2	1	1	2	3	0		1	1	1			3	4	6	3	1	1	1	2	2	3	5	3	3	4	4	4	5
1082	B	22	1	1	2	1	5	1	3	1	2	3	3	4	2	2	5	4	2	2	1	2	2	1	2	0		0				3		4	2	3	3	3	3	3	3	3	4	4	5	5	4	5	4
1083	B	22	2	3	2	2	5	1	3	2	1	2	2	4	3	3	5	4	3	4	2	3	3	2	2	0		0				3		4	4	3	5	5	4	4	4	4	4	4	5	5	4	5	5
1084	B	22	2	3	2	1	4	1	3	2	3	2	2	5	3	3	5	5	3	2	2	3	3	2	3	0		1	1	0			2	3	4	3	5	4	4	2	4	3	4	4	3	3	4	4	5
1085	B	22	1	5	2	1	4	2	3	1	3	2	2	5	2	3	5	5	2	5	2	3	1	2	4	0		1	1	1			1	6	5	2	3	3	3	3	3	3	4	4	5	4	4	4	4
1086	B	22	2	3	2	1	4	3	2	1	4	2	3	5	3	3	5	5	3	5	1	3	3	2	3	0		1	1	1			3	2	1	3	4	3	4	4	4	4	3	3	4	4	4	4	5
1087	B	22	1	3	2	3	5	3	1	2	5	3	2	4	2	2	5	4	3	4	2	2	1	2	3	1	1	0				3		4	1	3	5	3	3	3	3	4	4	4	4	4	5	4	3
1088	B	22	1	3	2	2	5	1	2	1	4	2	2	4	3	3	4	4	3	4	3	3	2	1	3	1	7	0				4		4	2	3	3	3	3	3	3	2	4	4	3	4	4	4	5
1089	B	22	2	1	2	1	4	1	3	1	3	1	3	5	1	3	5	5	1	2	1	3	3	1	3	0		1	0		1		2	4	3	3	3	3	2	2	2	2	4	4	4	3	3	4	4
1090	B	22	2	2	2	3	5	4	1	3	3	2	4	5	2	2	5	5	2	5	1	2	2	1	2	1	1	1	1	1			3	4	4	3	3	3	4	3	3	4	5	4	4	4	5	4	3
1091	B	22	2	3	2	2	5	3	2	1	2	4	2	4	2	3	5	4	3	4	2	3	3	2	3	1	1	0				3		6	2	3	4	3	3	3	3	3	4	5	5	5	4	4	4
1092	B	22	1	3	2	3	5	3	4	1	3	2	2	5	3	3	5	5	3	5	1	3	2	1	3	1	1	1	1	1			2	6	2	9	5	5	5	4	5	5	5	5	5	5	5	5	4
1093	B	22	1	3	2	3	5	2	3	1	4	2	3	3	2	2	4	3	2	3	1	2	2	4	2	0		0				3		6	2	5	4	4	4	4	4	3	4	4	3	3	4	4	4
1094	B	22	2	4	2	1	5	2	1	2	2	4	2	5	3	3	5	5	3	5	2	3	3	2	3	1	1	1	1	1			1	4	1	5	4	3	5	4	4	4	5	5	5	5	5	5	5
1095	B	22	2	3	2	2	4	4	1	2	5	1	1	4	1	1	5	4	1	2	3	1	2	4	1	0		1	0		1		3	4	1	3	2	2	3	3	3	3	4	4	4	4	4	4	3
1096	B	22	2	4	2	1	5	2	3	1	3	1	3	3	1	3	3	3	1	3	1	3	2	1	3	1	2	0				2		4	4	5	5	3	3	4	4	3	5	5	5	5	5	5	5
1097	B	22	1	2	2	1	5	2	3	1	3	3	4	5	3	3	5	5	3	5	2	3	3	2	3	1	1	1	0		1		2	4	1	5	2	3	3	2	3	3	2	2	2	2	2	2	3
1098	B	22	2	4	2	1	5	1	3	1	3	2	4	5	2	2	5	5	3	5	4	2	2	4	2	3	1	1	0		1		3	4	3	3	4	3	4	3	4	4	4	5	5	4	4	4	4
1099	B	22	1	4	2	3	5	4	1	3	2	2	3	5	2	2	5	5	2	5	1	2	2	1	2	1	1	1	1	1			3	4	3	3	3	3	3	3	3	3	5	3	3	4	4	5	3
1100	B	22	2	3	2	2	5	1	3	1	3	2	2	5	2	3	5	5	2	5	2	3	3	2	3	1	1	1	1	0			4	3	3	3	4	4	3	3	3	1	3	3	3	3	3	3	4
1101	A	22	1	4	2	1	4	1	2	1	4	2	2	3	2	2	3	3	3	3	1	2	2	1	2	0		0				3		4	1	8	4	4	4	4	4	4	3	3	3	3	4	3	3
1102	A	22	2	3	2	3	5	1	2	1	5	2	2	5	2	3	4	5	2	5	2	3	3	2	3	1	2	1	1	1			1	4	5	3	4	3	3	3	4	3	4	5	5	4	5	4	5
1103	A	22	2	3	2	2	5	3	1	3	5	2	2	5	2	2	3	5	2	5	1	2	2	1	2	0		0				1		3	4	3	3	3	3	3	3	3	4	4	5	4	3	5	5
1104	A	22	1	3	1	3	5	3	4	1	3	1	3	5	1	1	5	5	3	5	1	2	2	1	2	1	6	0				3		6	3	7	3	4	3	3	3	4	3	3	4	4	4	3	5
1105	A	22	1	4	2	3	5	3	4	1	3	1	1	5	3	3	5	5	3	5	1	3	3	1	3	1	1	1	0		1		1	4	1	4	2	2	3	2	2	2	3	3	3	3	3	3	5
1106	A	22	2	1	2	1	5	1	3	1	4	3	1	5	1	1	5	5	1	5	1	4	4	1	4	2	1	1	1	1			2	2	2	4	4	4	4	4	4	4	3	3	3	3	3	3	3
1107	A	22	2	3	2	2	5	1	2	1	5	1	1	5	3	3	5	5	3	5	2	3	3	2	3	1	7	1	1	0			1	1	8	3	4	3	5	3	4	4	4	4	4	4	4	4	4
1108	A	22	2	1	2	1	5	1	2	1	4	3	3	5	3	3	5	5	3	5	1	3	3	1	3	0		1	1	1			3	4	1	3	3	3	3	2	3	2	3	3	3	3	3	3	3
1109	A	22	1	4	2	1	5	4	3	1	3	1	4	5	1	3	5	5	1	5	1	3	3	1	3	0		1	0		1		3	4	3	2	3	3	5	4	4	4	3	4	4	4	4	4	3
1110	A	23	2	2	2	1	5	1	2	1	3	1	1	5	1	1	5	5	3	5	3	1	1	3	1	0		1	1	1			5	4	2	3	3	3	3	3	3	3	3	3	3	3	3	3	4
1111	A	23	1	2	1	3	4	1	2	1	3	2	3	4	3	3	4	4	3	4	2	3	3	2	3	0		0				4		6	2	5	2	4	2	3	4	4	3	3	4	4	3	3	4
1112	A	23	2	2	2	2	4	2	3	1	4	2	2	5	2	2	5	5	2	5	1	2	2	1	2	0		1	1	1			2	2	8	3	3	4	3	3	4	3	4	4	5	3	3	4	4
1113	A	23	2	3	2	1	5	3	2	1	4	1	1	5	1	1	5	5	1	5	2	1	1	2	1	2	1	1	1	1			2	3	3	3	3	4	4	4	3	4	3	3	3	3	3	3	4
1114	A	23	1	3	2	3	5	2	1	1	5	3	1	5	1	3	5	5	3	2	1	3	3	1	3	0		1	1	1			3	4	4	5	4	4	4	4	4	4	4	4	4	4	4	4	4
1115	A	23	2	5	2	2	5	1	2	1	3	1	3	5	3	3	3	5	3	5	2	3	3	2	3	1	9	0				2		2	1	6	2	2	2	3	3	3	3	2	3	3	3	3	3
1116	A	23	2	2	2	2	5	4	1	2	2	1	1	5	1	3	5	5	1	5	1	3	3	1	3	0		1	0		1		2	4	8	5	5	3	5	4	5	5	4	4	5	5	4	4	3
1117	A	23	1	1	2	2	5	2	3	1	2	1	1	5	3	3	5	5	3	5	1	3	3	1	3	1	1	1	1	0			1	4	1	3	4	3	3	2	2	2	3	3	3	3	3	3	4
1118	A	23	2	1	2	3	5	2	3	1	5	1	3	5	3	3	5	5	3	5	1	3	3	1	3	0		1	1	1			3	4	1	5	2	2	2	2	2	2	4	4	4	3	3	5	4
1119	A	23	1	4	2	2	5	4	1	2	5	2	2	2	3	3	4	2	3	2	1	3	3	1	3	0		0				3		5	3	4	4	2	3	3	3	3	3	3	4	5	5	4	4
1120	A	23	2	4	1	2	5	1	2	1	5	2	4	5	3	3	5	5	3	5	2	3	3	2	3	0		1	1	1			1	4	4	4	3	3	3	2	2	3	3	4	4	4	5	4	3
1121	A	23	2	4	1	1	5	1	2	2	5	2	2	4	3	3	5	4	3	4	2	3	3	2	2	1	3	0				3		6	4	4	4	3	3	3	3	3	2	2	3	3	4	4	4
1122	A	23	1	4	2	2	5	2	1	2	5	1	3	5	1	3	5	5	1	5	1	3	3	1	2	0		1	1	0			3	4	2	4	1	2	2	3	2	2	4	5	3	3	4	5	3
1123	A	23	2	2	2	1	5	2	3	1	5	1	1	5	3	3	5	5	3	5	2	3	3	2	3	0		1	1	1			3	4	4	4	3	2	3	3	5	2	4	5	5	4	4	4	4
1124	A	23	2	4	2	1	5	1	2	1	5	1	1	5	1	3	5	5	1	5	1	3	3	1	2	0		1	1	1			3	4	3	3	4	4	3	4	3	3	4	4	5	5	4	4	4
1125	A	23	1	4	2	1	5	4	1	2	5	3	1	4	3	3	4	4	3	4	2	3	3	2	2	0		0				3		6	2	3	3	3	3	3	3	3	4	5	5	4	4	5	3
1126	B	23	1	2	1	1	5	1	2	1	5	2	3	5	2	3	5	5	2	5	2	3	3	2	3	0		1	1	1			0	4	6	5	5	4	5	4	5	5	5	4	4	4	5	4	4
1127	B	23	2	1	2	1	5	2	1	3	5	1	1	5	3	3	5	5	3	5	2	3	3	2	2	1	1	1	1	1			4	4	2	3	3	3	3	3	3	3	4	5	5	4	4	5	3
1128	B	23	2	1	2	1	5	3	1	2	5	1	4	5	1	1	5	5	1	5	2	1	1	2	3	0		1	1	1			3	4	6	3	1	1	1	2	2	3	5	3	3	4	4	4	5
1129	B	23	2	1	2	1	5	1	3	1	2	3	3	4	2	2	5	4	2	2	1	2	2	1	2	0		0				3		4	2	3	3	3	3	3	3	3	4	4	5	5	4	5	4
1130	B	23	1	3	2	2	5	1	3	2	1	2	2	4	3	3	5	4	3	4	2	3	3	2	2	0		0				3		4	4	3	5	5	4	4	4	4	4	4	5	5	4	5	5
1131	B	23	2	3	2	1	4	1	3	2	3	2	2	5	3	3	5	5	3	2	2	3	3	2	3	0		1	1	0			2	3	4	3	5	4	4	2	4	3	4	4	3	3	4	4	5
1132	B	23	1	5	2	1	4	2	3	1	3	2	2	5	2	3	5	5	2	5	2	3	1	2	4	0		1	1	1			1	6	5	2	3	3	3	3	3	3	4	4	5	4	4	4	4
1133	B	23	2	3	2	1	4	3	2	1	4	2	3	5	3	3	5	5	3	5	1	3	3	2	3	0		1	1	1			3	2	1	3	4	3	4	4	4	4	3	3	4	4	4	4	5
1134	B	23	1	3	2	3	5	3	1	2	5	3	2	4	2	2	5	4	3	4	2	2	1	2	3	1	1	0				3		4	1	3	5	3	3	3	3	4	4	4	4	4	5	4	3
1135	B	23	1	3	2	2	5	1	2	1	4	2	2	4	3	3	4	4	3	4	3	3	2	1	3	1	7	0				4		4	2	3	3	3	3	3	3	2	4	4	3	4	4	4	5
1136	B	23	2	1	2	1	4	1	3	1	3	1	3	5	1	3	5	5	1	2	1	3	3	1	3	0		1	0		1		2	4	3	3	3	3	2	2	2	2	4	4	4	3	3	4	4
1137	B	23	2	2	2	3	5	4	1	3	3	2	4	5	2	2	5	5	2	5	1	2	2	1	2	1	1	1	1	1			3	4	4	3	3	3	4	3	3	4	5	4	4	4	5	4	3
1138	B	23	1	3	2	2	5	3	2	1	2	4	2	4	2	3	5	4	3	4	2	3	3	2	3	1	1	0				3		6	2	3	4	3	3	3	3	3	4	5	5	5	4	4	4
1139	B	23	1	3	2	3	5	3	4	1	3	2	2	5	3	3	5	5	3	5	1	3	2	1	3	1	1	1	1	1			2	6	2	9	5	5	5	4	5	5	5	5	5	5	5	5	4
1140	B	23	1	3	2	3	5	2	3	1	4	2	3	3	2	2	4	3	2	3	1	2	2	4	2	0		0				3		6	2	5	4	4	4	4	4	3	4	4	3	3	4	4	4
1141	B	23	2	4	2	1	5	2	1	2	2	4	2	5	3	3	5	5	3	5	2	3	3	2	3	1	1	1	1	1			1	4	1	5	4	3	5	4	4	4	5	5	5	5	5	5	5
1142	B	23	2	3	2	2	4	4	1	2	5	1	1	4	1	1	5	4	1	2	3	1	2	4	1	0		1	0		1		3	4	1	3	2	2	3	3	3	3	4	4	4	4	4	4	3
1143	B	23	2	4	2	1	5	2	3	1	3	1	3	3	1	3	3	3	1	3	1	3	2	1	3	1	2	0				2		4	4	5	5	3	3	4	4	3	5	5	5	5	5	5	5
1144	B	23	2	2	2	1	5	2	3	1	3	3	4	5	3	3	5	5	3	5	2	3	3	2	3	1	1	1	0		1		2	4	1	5	2	3	3	2	3	3	2	2	2	2	2	2	3
1145	B	23	2	3	1	1	4	2	3	1	4	2	2	5	2	3	5	5	2	5	2	3	2	1	3	0		1	1	1			0	4	6	5	3	3	3	3	2	3	5	5	5	5	5	5	3
1146	B	23	2	2	2	3	5	3	1	3	3	1	3	5	1	1	5	5	1	5	2	1	3	2	2	1	1	1	1	0			3	6	2	3	3	2	3	3	3	2	3	3	3	3	4	4	4
1147	B	23	2	4	2	2	5	3	1	3	4	3	2	4	3	3	4	4	3	4	2	3	2	1	2	1	1	0				3		4	2	3	3	2	3	3	3	3	5	5	5	5	5	5	4
1148	B	23	2	4	2	1	5	1	2	1	3	2	2	5	2	2	5	5	2	2	3	2	2	1	3	1	1	1	1	0			1	4	1	3	4	2	3	3	5	4	5	5	5	5	5	5	4
1149	B	23	2	4	2	3	5	1	2	1	5	4	3	5	1	1	5	5	1	5	2	1	3	1	2	0	1	1	0		1		2	4	4	3	5	2	4	5	5	5	5	5	5	5	3	5	4
1150	B	24	2	5	2	2	5	3	2	4	5	2	2	4	2	3	5	4	2	4	2	3	4	1	2	0	2	0				3		3	2	3	4	5	5	4	5	5	4	4	3	4	4	4	4
1151	A	24	1	5	2	2	5	1	2	1	5	4	4	5	3	3	5	5	3	5	2	3	3	2	3	1	1	1	1	1			2	4	1	5	2	1	5	3	4	4	4	4	4	4	4	4	4
1152	A	24	2	4	2	1	5	3	1	3	3	2	2	5	2	2	5	5	2	5	2	1	1	2	1	1	1	1	1	1			3	4	3	3	3	4	3	3	3	3	3	3	3	3	3	3	4
1153	A	24	2	5	1	2	5	1	2	1	2	1	1	5	3	3	5	5	3	5	3	2	2	3	2	1	9	1	1	1			2	6	4	9	2	3	2	2	2	2	4	4	5	3	3	4	4
1154	A	24	2	2	2	1	5	3	1	2	4	2	2	5	2	2	5	5	2	5	2	1	1	2	1	1	10	1	0		1		4	2	2	3	3	3	3	4	3	3	4	4	4	5	5	4	5
1155	A	24	2	4	2	1	5	3	1	3	4	2	2	4	2	3	4	4	3	4	2	3	3	2	3	3	10	0				3		2	4	3	5	5	5	4	4	5	5	5	4	4	5	4	4
1156	A	24	2	4	2	1	5	3	1	3	3	3	4	5	2	2	5	5	2	5	2	1	1	2	1	1	1	1	0		1		3	2	4	3	2	3	4	4	3	3	5	4	4	5	5	4	5
1157	A	24	2	5	2	1	5	1	3	1	4	2	3	5	2	2	5	5	2	5	1	2	2	1	2	2	3	1	1	0			2	4	5	3	4	4	4	3	3	3	4	5	4	4	5	4	5
1158	A	24	2	3	1	1	5	4	2	1	5	1	1	5	3	3	5	5	3	5	1	3	3	1	3	1	3	1	1	1			2	5	6	4	4	4	4	4	4	4	2	3	3	3	3	3	4
1159	A	24	1	3	2	1	5	1	2	3	3	2	2	5	2	2	5	5	3	5	1	2	2	1	2	2	1	1	0		1		2	4	8	1	3	2	4	3	3	4	5	4	4	5	5	5	3
1160	A	24	2	4	2	1	5	3	1	2	4	2	2	5	2	3	5	5	2	2	2	3	3	2	3	1	1	1	1	1			1	3	1	3	3	2	3	3	3	3	4	5	3	3	4	4	4
1161	A	24	1	4	2	2	5	1	2	1	3	2	3	5	2	2	5	5	2	5	1	2	2	1	2	2	1	1	0		1		2	4	8	1	3	3	4	3	3	3	3	3	3	3	3	3	3
1162	A	24	1	4	2	1	5	1	2	1	3	3	2	5	2	2	5	5	3	4	4	2	2	4	2	2	1	1	1	0			2	4	4	1	3	4	4	4	4	4	4	4	4	4	4	4	3
1163	A	24	2	4	2	1	5	1	3	2	4	2	2	5	2	3	5	5	2	5	2	3	3	2	3	0		1	1	1			3	3	2	3	3	3	3	3	3	4	3	3	3	4	4	4	3
1164	A	24	2	4	2	1	5	1	3	1	3	2	4	5	2	2	5	5	3	5	4	2	2	4	2	3	1	1	0		1		3	4	3	3	4	3	4	3	4	4	4	5	5	4	4	4	4
1165	A	24	2	4	2	3	5	4	1	3	2	2	3	5	2	2	5	5	2	5	1	2	2	1	2	1	1	1	1	1			3	4	3	3	3	3	3	3	3	3	5	3	3	4	4	5	3
1166	A	24	2	3	2	2	5	1	3	1	3	2	2	5	2	3	5	5	2	5	2	3	3	2	3	1	1	1	1	0			4	3	3	3	4	4	3	3	3	1	3	3	3	3	3	3	4
1167	A	24	1	4	2	1	4	1	2	1	4	2	2	3	2	2	3	3	3	3	1	2	2	1	2	0		0				3		4	1	8	4	4	4	4	4	4	3	3	3	3	4	3	3
1168	A	24	2	3	2	3	5	1	2	1	5	2	2	5	2	3	4	5	2	5	2	3	3	2	3	1	2	1	1	1			1	4	5	3	4	3	3	3	4	3	4	5	5	4	5	4	5
1169	A	24	2	3	2	2	5	3	1	3	5	2	2	5	2	2	3	5	2	5	1	2	2	1	2	0		0				1		3	4	3	3	3	3	3	3	3	4	4	5	4	3	5	5
1170	A	24	1	3	1	3	5	3	4	1	3	1	3	5	1	1	5	5	3	5	1	2	2	1	2	1	6	0				3		6	3	7	3	4	3	3	3	4	3	3	4	4	4	3	5
1171	A	24	1	4	2	3	5	3	4	1	3	1	1	5	3	3	5	5	3	5	1	3	3	1	3	1	1	1	0		1		1	4	1	4	2	2	3	2	2	2	3	3	3	3	3	3	5
1172	A	24	2	1	2	1	5	1	3	1	4	3	1	5	1	1	5	5	1	5	1	4	4	1	4	2	1	1	1	1			2	2	2	4	4	4	4	4	4	4	3	3	3	3	3	3	3
1173	A	24	2	3	2	2	5	1	2	1	5	1	1	5	3	3	5	5	3	5	2	3	3	2	3	1	7	1	1	0			1	1	8	3	4	3	5	3	4	4	4	4	4	4	4	4	4
1174	A	24	2	1	2	1	5	1	2	1	4	3	3	5	3	3	5	5	3	5	1	3	3	1	3	0		1	1	1			3	4	1	3	3	3	3	2	3	2	3	3	3	3	3	3	3
1175	A	24	1	4	2	1	5	4	3	1	3	1	4	5	1	3	5	5	1	5	1	3	3	1	3	0		1	0		1		3	4	3	2	3	3	5	4	4	4	3	4	4	4	4	4	3
1176	B	24	2	2	2	1	5	1	2	1	3	1	1	5	1	1	5	5	3	5	3	1	1	3	1	0		1	1	1			5	4	2	3	3	3	3	3	3	3	3	3	3	3	3	3	4
1177	B	24	2	2	1	3	4	1	2	1	3	2	3	4	3	3	4	4	3	4	2	3	3	2	3	0		0				4		6	2	5	2	4	2	3	4	4	3	3	4	4	3	3	4
1178	B	24	2	2	2	2	4	2	3	1	4	2	2	5	2	2	5	5	2	5	1	2	2	1	2	0		1	1	1			2	2	8	3	3	4	3	3	4	3	4	4	5	3	3	4	4
1179	B	24	2	3	2	1	5	3	2	1	4	1	1	5	1	1	5	5	1	5	2	1	1	2	1	2	1	1	1	1			2	3	3	3	3	4	4	4	3	4	3	3	3	3	3	3	4
1180	B	24	2	3	2	3	5	2	1	1	5	3	1	5	1	3	5	5	3	2	1	3	3	1	3	0		1	1	1			3	4	4	5	4	4	4	4	4	4	4	4	4	4	4	4	4
1181	B	24	2	5	2	2	5	1	2	1	3	1	3	5	3	3	3	5	3	5	2	3	3	2	3	1	9	0				2		2	1	6	2	2	2	3	3	3	3	2	3	3	3	3	3
1182	B	24	2	2	2	2	5	4	1	2	2	1	1	5	1	3	5	5	1	5	1	3	3	1	3	0		1	0		1		2	4	8	5	5	3	5	4	5	5	4	4	5	5	4	4	3
1183	B	24	2	1	2	2	5	2	3	1	2	1	1	5	3	3	5	5	3	5	1	3	3	1	3	1	1	1	1	0			1	4	1	3	4	3	3	2	2	2	3	3	3	3	3	3	4
1184	B	24	2	1	2	3	5	2	3	1	5	1	3	5	3	3	5	5	3	5	1	3	3	1	3	0		1	1	1			3	4	1	5	2	2	2	2	2	2	4	4	4	3	3	5	4
1185	B	24	1	4	2	2	5	4	1	2	5	2	2	2	3	3	4	2	3	2	1	3	3	1	3	0		0				3		5	3	4	4	2	3	3	3	3	3	3	4	5	5	4	4
1186	B	24	2	4	1	2	5	1	2	1	5	2	4	5	3	3	5	5	3	5	2	3	3	2	3	0		1	1	1			1	4	4	4	3	3	3	2	2	3	3	4	4	4	5	4	3
1187	B	24	2	4	1	1	5	1	2	2	5	2	2	4	3	3	5	4	3	4	2	3	3	2	2	1	3	0				3		6	4	4	4	3	3	3	3	3	2	2	3	3	4	4	4
1188	B	24	2	4	2	2	5	2	1	2	5	1	3	5	1	3	5	5	1	5	1	3	3	1	2	0		1	1	0			3	4	2	4	1	2	2	3	2	2	4	5	3	3	4	5	3
1189	B	24	2	2	2	1	5	2	3	1	5	1	1	5	3	3	5	5	3	5	2	3	3	2	3	0		1	1	1			3	4	4	4	3	2	3	3	5	2	4	5	5	4	4	4	4
1190	B	24	2	4	2	1	5	1	2	1	5	1	1	5	1	3	5	5	1	5	1	3	3	1	2	0		1	1	1			3	4	3	3	4	4	3	4	3	3	4	4	5	5	4	4	4
1191	B	24	2	4	2	1	5	4	1	2	5	3	1	4	3	3	4	4	3	4	2	3	3	2	2	0		0				3		6	2	3	3	3	3	3	3	3	4	5	5	4	4	5	3
1192	B	24	1	2	1	1	5	1	2	1	5	2	3	5	2	3	5	5	2	5	2	3	3	2	3	0		1	1	1			0	4	6	5	5	4	5	4	5	5	5	4	4	4	5	4	4
1193	B	24	2	1	2	1	5	2	1	3	5	1	1	5	3	3	5	5	3	5	2	3	3	2	2	1	1	1	1	1			4	4	2	3	3	3	3	3	3	3	4	5	5	4	4	5	3
1194	B	24	2	1	2	1	5	3	1	2	5	1	4	5	1	1	5	5	1	5	2	1	1	2	3	0		1	1	1			3	4	6	3	1	1	1	2	2	3	5	3	3	4	4	4	5
1195	B	24	2	1	2	1	5	1	3	1	2	3	3	4	2	2	5	4	2	2	1	2	2	1	2	0		0				3		4	2	3	3	3	3	3	3	3	4	4	5	5	4	5	4
1196	B	24	2	3	2	2	5	1	3	2	1	2	2	4	3	3	5	4	3	4	2	3	3	2	2	0		0				3		4	4	3	5	5	4	4	4	4	4	4	5	5	4	5	5
1197	B	24	2	3	2	1	4	1	3	2	3	2	2	5	3	3	5	5	3	2	2	3	3	2	3	0		1	1	0			2	3	4	3	5	4	4	2	4	3	4	4	3	3	4	4	5
1198	B	24	2	5	2	1	4	2	3	1	3	2	2	5	2	3	5	5	2	5	2	3	1	2	4	0		1	1	1			1	6	5	2	3	3	3	3	3	3	4	4	5	4	4	4	4
1199	B	24	2	3	2	1	4	3	2	1	4	2	3	5	3	3	5	5	3	5	1	3	3	2	3	0		1	1	1			3	2	1	3	4	3	4	4	4	4	3	3	4	4	4	4	5
1200	B	25	1	3	2	3	5	3	1	2	5	3	2	4	2	2	5	4	3	4	2	2	1	2	3	1	1	0				3		4	1	3	5	3	3	3	3	4	4	4	4	4	5	4	3
1201	A	25	2	3	2	2	5	1	2	1	4	2	2	4	3	3	4	4	3	4	3	3	2	1	3	1	7	0				4		4	2	3	3	3	3	3	3	2	4	4	3	4	4	4	5
1202	A	25	2	1	2	1	4	1	3	1	3	1	3	5	1	3	5	5	1	2	1	3	3	1	3	0		1	0		1		2	4	3	3	3	3	2	2	2	2	4	4	4	3	3	4	4
1203	A	25	2	2	2	3	5	4	1	3	3	2	4	5	2	2	5	5	2	5	1	2	2	1	2	1	1	1	1	1			3	4	4	3	3	3	4	3	3	4	5	4	4	4	5	4	3
1204	A	25	2	3	2	2	5	3	2	1	2	4	2	4	2	3	5	4	3	4	2	3	3	2	3	1	1	0				3		6	2	3	4	3	3	3	3	3	4	5	5	5	4	4	4
1205	A	25	1	3	2	3	5	3	4	1	3	2	2	5	3	3	5	5	3	5	1	3	2	1	3	1	1	1	1	1			2	6	2	9	5	5	5	4	5	5	5	5	5	5	5	5	4
1206	A	25	1	3	2	3	5	2	3	1	4	2	3	3	2	2	4	3	2	3	1	2	2	4	2	0		0				3		6	2	5	4	4	4	4	4	3	4	4	3	3	4	4	4
1207	A	25	2	4	2	1	5	2	1	2	2	4	2	5	3	3	5	5	3	5	2	3	3	2	3	1	1	1	1	1			1	4	1	5	4	3	5	4	4	4	5	5	5	5	5	5	5
1208	A	25	2	3	2	2	4	4	1	2	5	1	1	4	1	1	5	4	1	2	3	1	2	4	1	0		1	0		1		3	4	1	3	2	2	3	3	3	3	4	4	4	4	4	4	3
1209	A	25	2	4	2	1	5	2	3	1	3	1	3	3	1	3	3	3	1	3	1	3	2	1	3	1	2	0				2		4	4	5	5	3	3	4	4	3	5	5	5	5	5	5	5
1210	A	25	2	2	2	1	5	2	3	1	3	3	4	5	3	3	5	5	3	5	2	3	3	2	3	1	1	1	0		1		2	4	1	5	2	3	3	2	3	3	2	2	2	2	2	2	3
1211	A	25	2	3	1	1	4	2	3	1	4	2	2	5	2	3	5	5	2	5	2	3	2	1	3	0		1	1	1			0	4	6	5	3	3	3	3	2	3	5	5	5	5	5	5	3
1212	A	25	2	2	2	3	5	3	1	3	3	1	3	5	1	1	5	5	1	5	2	1	3	2	2	1	1	1	1	0			3	6	2	3	3	2	3	3	3	2	3	3	3	3	4	4	4
1213	A	25	2	4	2	2	5	3	1	3	4	3	2	4	3	3	4	4	3	4	2	3	2	1	2	1	1	0				3		4	2	3	3	2	3	3	3	3	5	5	5	5	5	5	4
1214	A	25	2	4	2	1	5	1	2	1	3	2	2	5	2	2	5	5	2	2	3	2	2	1	3	1	1	1	1	0			1	4	1	3	4	2	3	3	5	4	5	5	5	5	5	5	4
1215	A	25	2	4	2	3	5	1	2	1	5	4	3	5	1	1	5	5	1	5	2	1	3	1	2	0	1	1	0		1		2	4	4	3	5	2	4	5	5	5	5	5	5	5	3	5	4
1216	A	25	2	5	2	2	5	3	2	4	5	2	2	4	2	3	5	4	2	4	2	3	4	1	2	0	2	0				3		3	2	3	4	5	5	4	5	5	4	4	3	4	4	4	4
1217	A	25	1	5	2	2	5	1	2	1	5	4	4	5	3	3	5	5	3	5	2	3	3	2	3	1	1	1	1	1			2	4	1	5	2	1	5	3	4	4	4	4	4	4	4	4	4
1218	A	25	1	4	2	2	5	1	2	1	3	2	3	5	2	2	5	5	2	5	1	2	2	1	2	2	1	1	0		1		2	4	8	1	3	3	4	3	3	3	3	3	3	3	3	3	3
1219	A	25	1	4	2	1	5	1	2	1	3	3	2	5	2	2	5	5	3	4	4	2	2	4	2	2	1	1	1	0			2	4	4	1	3	4	4	4	4	4	4	4	4	4	4	4	3
1220	A	25	2	4	2	1	5	1	3	2	4	2	2	5	2	3	5	5	2	5	2	3	3	2	3	0		1	1	1			3	3	2	3	3	3	3	3	3	4	3	3	3	4	4	4	3
1221	A	25	2	4	2	1	5	1	3	1	3	2	4	5	2	2	5	5	3	5	4	2	2	4	2	3	1	1	0		1		3	4	3	3	4	3	4	3	4	4	4	5	5	4	4	4	4
1222	A	25	2	4	2	3	5	4	1	3	2	2	3	5	2	2	5	5	2	5	1	2	2	1	2	1	1	1	1	1			3	4	3	3	3	3	3	3	3	3	5	3	3	4	4	5	3
1223	A	25	2	3	2	2	5	1	3	1	3	2	2	5	2	3	5	5	2	5	2	3	3	2	3	1	1	1	1	0			4	3	3	3	4	4	3	3	3	1	3	3	3	3	3	3	4
1224	A	25	1	4	2	1	4	1	2	1	4	2	2	3	2	2	3	3	3	3	1	2	2	1	2	0		0				3		4	1	8	4	4	4	4	4	4	3	3	3	3	4	3	3
1225	A	25	2	3	2	3	5	1	2	1	5	2	2	5	2	3	4	5	2	5	2	3	3	2	3	1	2	1	1	1			1	4	5	3	4	3	3	3	4	3	4	5	5	4	5	4	5
1226	B	25	2	3	2	2	5	3	1	3	5	2	2	5	2	2	3	5	2	5	1	2	2	1	2	0		0				1		3	4	3	3	3	3	3	3	3	4	4	5	4	3	5	5
1227	B	25	1	3	1	3	5	3	4	1	3	1	3	5	1	1	5	5	3	5	1	2	2	1	2	1	6	0				3		6	3	7	3	4	3	3	3	4	3	3	4	4	4	3	5
1228	B	25	1	4	2	3	5	3	4	1	3	1	1	5	3	3	5	5	3	5	1	3	3	1	3	1	1	1	0		1		1	4	1	4	2	2	3	2	2	2	3	3	3	3	3	3	5
1229	B	25	2	1	2	1	5	1	3	1	4	3	1	5	1	1	5	5	1	5	1	4	4	1	4	2	1	1	1	1			2	2	2	4	4	4	4	4	4	4	3	3	3	3	3	3	3
1230	B	25	2	3	2	2	5	1	2	1	5	1	1	5	3	3	5	5	3	5	2	3	3	2	3	1	7	1	1	0			1	1	8	3	4	3	5	3	4	4	4	4	4	4	4	4	4
1231	B	25	2	1	2	1	5	1	2	1	4	3	3	5	3	3	5	5	3	5	1	3	3	1	3	0		1	1	1			3	4	1	3	3	3	3	2	3	2	3	3	3	3	3	3	3
1232	B	25	1	4	2	1	5	4	3	1	3	1	4	5	1	3	5	5	1	5	1	3	3	1	3	0		1	0		1		3	4	3	2	3	3	5	4	4	4	3	4	4	4	4	4	3
1233	B	25	2	2	2	1	5	1	2	1	3	1	1	5	1	1	5	5	3	5	3	1	1	3	1	0		1	1	1			5	4	2	3	3	3	3	3	3	3	3	3	3	3	3	3	4
1234	B	25	2	2	1	3	4	1	2	1	3	2	3	4	3	3	4	4	3	4	2	3	3	2	3	0		0				4		6	2	5	2	4	2	3	4	4	3	3	4	4	3	3	4
1235	B	25	2	2	2	2	4	2	3	1	4	2	2	5	2	2	5	5	2	5	1	2	2	1	2	0		1	1	1			2	2	8	3	3	4	3	3	4	3	4	4	5	3	3	4	4
1236	B	25	2	3	2	1	5	3	2	1	4	1	1	5	1	1	5	5	1	5	2	1	1	2	1	2	1	1	1	1			2	3	3	3	3	4	4	4	3	4	3	3	3	3	3	3	4
1237	B	25	2	3	2	3	5	2	1	1	5	3	1	5	1	3	5	5	3	2	1	3	3	1	3	0		1	1	1			3	4	4	5	4	4	4	4	4	4	4	4	4	4	4	4	4
1238	B	25	2	5	2	2	5	1	2	1	3	1	3	5	3	3	3	5	3	5	2	3	3	2	3	1	9	0				2		2	1	6	2	2	2	3	3	3	3	2	3	3	3	3	3
1239	B	25	2	2	2	2	5	4	1	2	2	1	1	5	1	3	5	5	1	5	1	3	3	1	3	0		1	0		1		2	4	8	5	5	3	5	4	5	5	4	4	5	5	4	4	3
1240	B	25	2	1	2	2	5	2	3	1	2	1	1	5	3	3	5	5	3	5	1	3	3	1	3	1	1	1	1	0			1	4	1	3	4	3	3	2	2	2	3	3	3	3	3	3	4
1241	B	25	2	1	2	3	5	2	3	1	5	1	3	5	3	3	5	5	3	5	1	3	3	1	3	0		1	1	1			3	4	1	5	2	2	2	2	2	2	4	4	4	3	3	5	4
1242	B	25	1	4	2	2	5	4	1	2	5	2	2	2	3	3	4	2	3	2	1	3	3	1	3	0		0				3		5	3	4	4	2	3	3	3	3	3	3	4	5	5	4	4
1243	B	25	2	4	1	2	5	1	2	1	5	2	4	5	3	3	5	5	3	5	2	3	3	2	3	0		1	1	1			1	4	4	4	3	3	3	2	2	3	3	4	4	4	5	4	3
1244	B	25	2	4	1	1	5	1	2	2	5	2	2	4	3	3	5	4	3	4	2	3	3	2	2	1	3	0				3		6	4	4	4	3	3	3	3	3	2	2	3	3	4	4	4
1245	B	25	2	4	2	2	5	2	1	2	5	1	3	5	1	3	5	5	1	5	1	3	3	1	2	0		1	1	0			3	4	2	4	1	2	2	3	2	2	4	5	3	3	4	5	3
1246	B	25	2	2	2	1	5	2	3	1	5	1	1	5	3	3	5	5	3	5	2	3	3	2	3	0		1	1	1			3	4	4	4	3	2	3	3	5	2	4	5	5	4	4	4	4
1247	B	25	2	4	2	1	5	1	2	1	5	1	1	5	1	3	5	5	1	5	1	3	3	1	2	0		1	1	1			3	4	3	3	4	4	3	4	3	3	4	4	5	5	4	4	4
1248	B	25	2	4	2	1	5	4	1	2	5	3	1	4	3	3	4	4	3	4	2	3	3	2	2	0		0				3		6	2	3	3	3	3	3	3	3	4	5	5	4	4	5	3
1249	B	25	1	2	1	1	5	1	2	1	5	2	3	5	2	3	5	5	2	5	2	3	3	2	3	0		1	1	1			0	4	6	5	5	4	5	4	5	5	5	4	4	4	5	4	4
1250	B	25	2	1	2	1	5	2	1	3	5	1	1	5	3	3	5	5	3	5	2	3	3	2	2	1	1	1	1	1			4	4	2	3	3	3	3	3	3	3	4	5	5	4	4	5	3
[truncated: 77 more columns]
